# Supplementary material for: Aryltrifluoromethylative cyclization of unactivated alkenes by the use of PhICF3Cl under catalyst-free conditions
Source: Royal Society of Chemistry journal article supplement (doi:10.1039/c8ob03189d), 2019-01-01

## SUPPORTING INFORMATION

---

### Supporting Information

## Aryltrifluoromethylative Cyclization of Unactivated Alkenes by the Use of $\text{PhIClCF}_3$ under Catalyst-Free Condition

Jia Guo,<sup>a</sup> Cong Xu,<sup>b</sup> Xiaowei Liu,<sup>a</sup> and Mang Wang<sup>\*,a,c</sup>

<sup>a</sup> Jilin Province Key Laboratory of Organic Functional Molecular Design & Synthesis, College of Chemistry, Northeast Normal University, 5268 Renmin Street, Changchun (China)

<sup>b</sup> National Engineering Laboratory for Druggable Gene and Protein Screening, School of Life Sciences, Northeast Normal University, 2555 Jingyue Street, Changchun (China)

<sup>c</sup> State Key Laboratory of Elemento-Organic Chemistry, Nankai University, Weijin Road 94, Tianjin (China).  
E-mail: wangm452@nenu.edu.cn.

### *Table of Contents*

|                                                       |    |
|-------------------------------------------------------|----|
| I. General Information .....                          | 2  |
| II. Screen of Reaction Conditions .....               | 2  |
| III. Procedures for the synthesis of substrates ..... | 4  |
| IV. Synthetic Procedures and Analytical Data .....    | 9  |
| V. Mechanistic Study .....                            | 12 |
| VI. References.....                                   | 13 |
| VIII. NMR Spectra.....                                | 14 |

# SUPPORTING INFORMATION

## I. General Information

All reagents were purchased from commercial sources and used without treatment, unless otherwise indicated. PIFA and TMSCF<sub>3</sub> were purchased from Energy Chemical Co. Ltd., Anhydrous MeCN, THF (Tetrahydrofuran), DMF (N, N-dimethylformamide), 1,4-dioxane were purchased from Innochem Co. Ltd., DCM (dichloromethane) was distilled over CaH<sub>2</sub> before use. The products were purified by column chromatography over silica gel (particle size 300-400 mesh ASTM, purchased from Taizhou, China). <sup>1</sup>H NMR, <sup>13</sup>C NMR spectra were recorded at 25 °C on a Bruker 600 MHz or Varian 500 MHz, 400 MHz, and 151 MHz or 125 MHz spectrometer, respectively by using TMS as internal standard. <sup>19</sup>F-NMR were recorded at 25 °C on a Bruker 565 MHz or Varian 470 MHz spectrometer by using (trifluoromethyl)benzene (δ -63.2 ppm) as external standard. Data for <sup>1</sup>H, <sup>13</sup>C, <sup>19</sup>F were recorded as follows: chemical shift (δ, ppm), multiplicity (s = singlet, d = doublet, t = triplet, q = quartet, m = multiplet, dd = doublet of doublets, dt = doublet of triplets, dq = doublet of quartets, td = triplet of doublets). High-resolution mass spectra (HRMS) were obtained using a Bruker micro TOF II focus spectrometer (ESI). Melting points were uncorrected. PhICF<sub>3</sub>Cl reagent was prepared according to literature procedures.<sup>[1]</sup>

## II. Screen of Reaction Conditions

Table S1. Screen of solvents.<sup>[a]</sup>

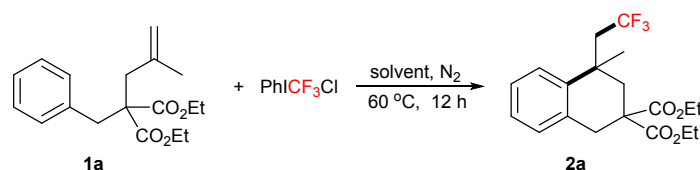

| Entry | Solvent     | Yield of <b>2a</b> [%] <sup>[b]</sup> |
|-------|-------------|---------------------------------------|
| 1     | MeCN        | 25                                    |
| 2     | NMP         | 31                                    |
| 3     | THF         | 44                                    |
| 4     | 1,4-dioxane | 73                                    |
| 5     | DCM         | 78                                    |
| 6     | DMF         | 85                                    |

[a] Reaction conditions: **1a** (0.1 mmol), PhICF<sub>3</sub>Cl (0.15 mmol), solvent (1 mL).

[b] <sup>19</sup>F NMR yields using PhCF<sub>3</sub> as an internal standard.

Table S2. Screen of temperature.<sup>[a]</sup>

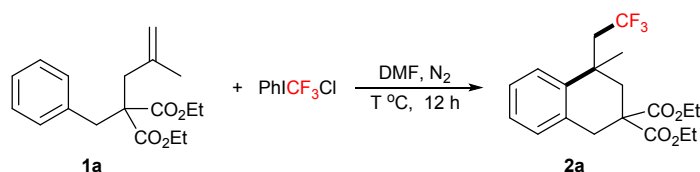

| Entry | T [°C] | Yield of <b>2a</b> [%] <sup>[b]</sup> |
|-------|--------|---------------------------------------|
| 1     | 30     | 18                                    |
| 2     | 40     | 78                                    |
| 3     | 50     | 88                                    |
| 4     | 60     | 98                                    |

[a] Reaction conditions: **1a** (0.1 mmol), PhICF<sub>3</sub>Cl (0.15 mmol), DMF (1 mL).

[b] <sup>19</sup>F NMR yields using PhCF<sub>3</sub> as an internal standard.

Table S3. Screen of time.<sup>[a]</sup>

# SUPPORTING INFORMATION

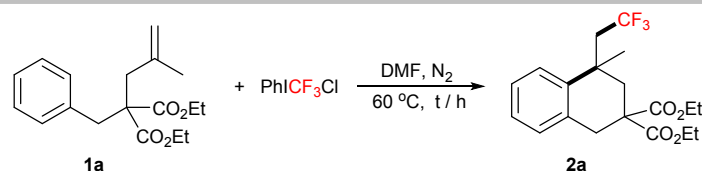

| Entry | t   | Yield of <b>2a</b> [%] <sup>[b]</sup> |
|-------|-----|---------------------------------------|
| 1     | 2h  | 32                                    |
| 2     | 4h  | 55                                    |
| 3     | 6h  | 68                                    |
| 4     | 8h  | 79                                    |
| 5     | 10h | 87                                    |
| 6     | 12h | 98                                    |

[a] Reaction conditions: **1a** (0.1 mmol),  $\text{PhICF}_3\text{Cl}$  (0.15 mmol), DMF (1 mL).

[b]  $^{19}\text{F}$  NMR yields using  $\text{PhCF}_3$  as an internal standard.

**Table S4. Screen of reaction atmosphere.**<sup>[a]</sup>

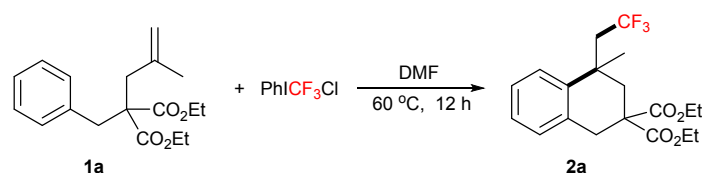

| Entry | $\text{N}_2$ or Air | Yield of <b>2a</b> [%] <sup>[b]</sup> |
|-------|---------------------|---------------------------------------|
| 1     | $\text{N}_2$        | 98                                    |
| 2     | Air                 | 51                                    |

[a] Reaction conditions: **1a** (0.1 mmol),  $\text{PhICF}_3\text{Cl}$  (0.15 mmol), DMF (1 mL).

[b]  $^{19}\text{F}$  NMR yields using  $\text{PhCF}_3$  as an internal standard.

**Table S5. Screen of the ratio of **1a** /  $\text{PhICF}_3\text{Cl}$ .**<sup>[a]</sup>

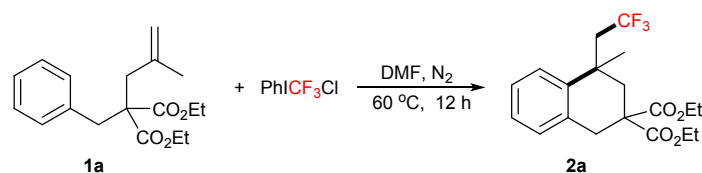

| Entry | <b>1a</b> : $\text{PhICF}_3\text{Cl}$ | Yield of <b>2a</b> [%] <sup>[b]</sup> |
|-------|---------------------------------------|---------------------------------------|
| 1     | 1 : 1.2                               | 87                                    |
| 2     | 1 : 1.5                               | 98                                    |
| 3     | 1 : 2.0                               | 98                                    |

[a] Reaction conditions: **1a** (0.1 mmol),  $\text{PhICF}_3\text{Cl}$  (x mmol), DMF (1 mL).

[b]  $^{19}\text{F}$  NMR yields using  $\text{PhCF}_3$  as an internal standard.

**Table S6. Catalyst-free trifluoromethylation-carbocyclizations using Togni's reagent.**<sup>[a]</sup>

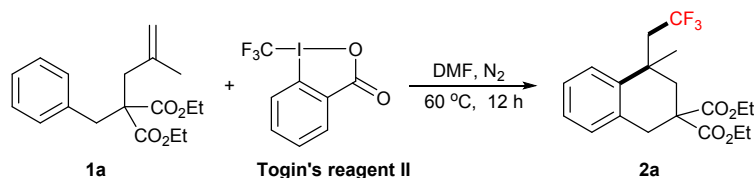

| <b>1a</b> | Yield of <b>2a</b> [%] <sup>[b]</sup> | Recovery of Togni's reagent II [%] <sup>[b]</sup> |
|-----------|---------------------------------------|---------------------------------------------------|
|           | 0                                     | 95                                                |

[a] Reaction conditions: **1a** (0.1 mmol), Togni's reagent II (0.15 mmol), DMF (1 mL).

[b]  $^{19}\text{F}$  NMR yields using  $\text{PhCF}_3$  as an internal standard.

**Table S7. Catalyst-free trifluoromethylation-carbocyclizations using Umemoto's reagent.**<sup>[a]</sup>

## SUPPORTING INFORMATION

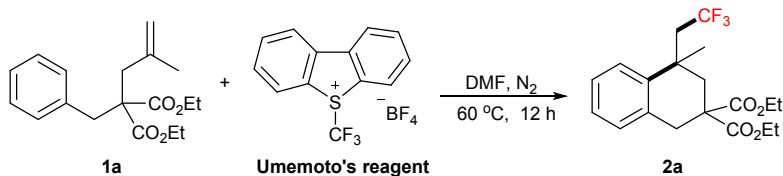

|           | Yield of <b>2a</b> [%] <sup>[b]</sup> | Recovery of <b>Umemoto's reagent</b> [%] <sup>[b]</sup> |
|-----------|---------------------------------------|---------------------------------------------------------|
| <b>1a</b> | 0                                     | 99                                                      |

[a] Reaction conditions: **1a** (0.1 mmol), **Umemoto's reagent II** (0.15 mmol), DMF (1 mL).

[b] <sup>19</sup>F NMR yields using PhCF<sub>3</sub> as an internal standard.

### III. Procedures for the synthesis of substrates

#### 1. Synthesis of substrates 1.

Substrates **1a-1q** were synthesized according to the literature, and the NMR spectroscopy were consistent with reported data.<sup>[2,3]</sup> Substrates **1c**, **1e-1i**, **1l-1n** were new compounds synthesized according to the literature.<sup>[2]</sup> The NMR spectroscopy were as follow:

Synthesis of substrates **1a-1k** (taking **1c** as an example):

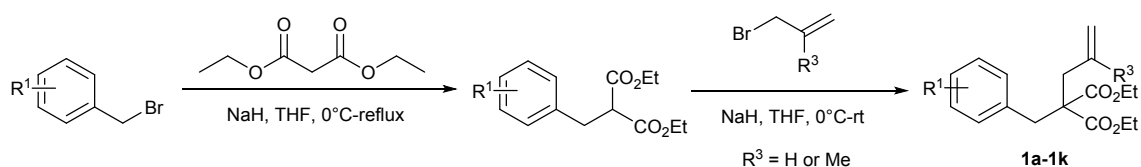

A 15 mL Schlenk tube was charged with a stir bar. The tube was evacuated and backfilled with N<sub>2</sub> (3 times). Diethyl malonate (0.92 mL, 6.0 mmol) was added drop-wise to a suspension of NaH (0.24 g, 60%, 6.0 mmol) in THF (5 mL) at 0 °C under N<sub>2</sub> and was stirred for 15 min. 1-(Bromomethyl)-4-methylbenzene (0.92 g, 5.0 mmol) was then added in one portion and the resulting milky mixture was stirred at reflux for 1 h. The reaction was then cooled and quenched by the addition of H<sub>2</sub>O. THF was removed under reduced pressure and the resulting crude was dissolved in Et<sub>2</sub>O and washed with water. The aqueous layer was extracted with Et<sub>2</sub>O (3 x 10 mL), and the combined organics were washed with brine, dried over anhydrous MgSO<sub>4</sub> and concentrated under reduce pressure. Residues were purified by silica column chromatography (eluent: petroleum ether/EtOAc = 15/1, v/v) to give 1.02 g (77%) of benzylated intermediate as a colourless oil. The NMR spectroscopy were consistent with reported data.<sup>[2]</sup>

A 15 mL Schlenk tube was charged with a stir bar. The tube was evacuated and backfilled with N<sub>2</sub> (3 times). NaH (0.06 g, 60%, 1.5 mmol) was dissolved in dry THF (5 mL) under N<sub>2</sub> atmosphere. The benzylated intermediate (0.27g, 1.0 mmol) was added slowly. The suspension was stirred 0.5 h at room temperature and 3-bromo-2-methylprop-1-ene (0.13 mL 1.5 mmol) was added. Two hours later, the reaction was quenched with sat. NH<sub>4</sub>Cl (10 mL). The reaction mixture was extracted with Et<sub>2</sub>O (3x10 mL) and brine (3x10 mL), dried over anhydrous MgSO<sub>4</sub> and concentrated under reduce pressure. Residues were purified by silica column chromatography (eluent: petroleum ether/EtOAc = 15/1, v/v) to give **1c** as a colourless oil.

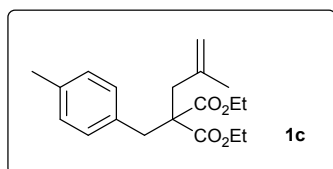

## SUPPORTING INFORMATION

**Diethyl-2-(2-methylallyl)-2-(4-methylbenzyl)malonate (1c).** 254.6 mg, 80% yield. Colourless oil.  $^1\text{H-NMR}$  (600 MHz,  $\text{CDCl}_3$ ):  $\delta$  = 7.03 (dd,  $J$  = 22.2 Hz, 7.8 Hz, 4H), 4.91 (s, 1H), 4.81 (s, 1H), 4.11 - 4.19 (m, 4H), 3.27 (s, 2H), 2.62 (s, 2H), 2.30 (s, 3H), 1.72 (s, 3H), 1.22 (t,  $J$  = 7.2 Hz, 6H).  $^{13}\text{C-NMR}$  (151 MHz,  $\text{CDCl}_3$ ):  $\delta$  = 171.2, 171.1, 141.2, 136.3, 133.3, 130.0, 130.0, 128.9, 128.8, 114.9, 61.2, 60.2, 58.5, 40.1, 38.4, 38.2, 23.8, 21.0, 13.9. HRMS (ESI): Calcd for  $[\text{C}_{19}\text{H}_{26}\text{O}_4, \text{M}+\text{Na}]^+$ : 341.1723, measured: 341.1730.

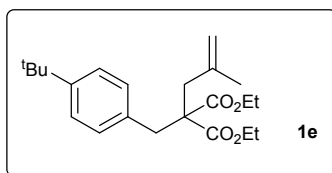

**Diethyl-2-(4-(tert-butyl)benzyl)-2-(2-methylallyl)malonate (1e).** 281.2 mg, 78% yield. Light yellow oil.  $^1\text{H-NMR}$  (600 MHz,  $\text{CDCl}_3$ ):  $\delta$  = 7.25 (d,  $J$  = 8.4 Hz, 2H), 7.06 (d,  $J$  = 8.4 Hz, 2H), 4.91 (t,  $J$  = 1.2 Hz, 1H), 4.81 (s, 1H), 4.09 - 4.17 (m, 4H), 3.27 (s, 2H), 2.64 (s, 2H), 1.73 (s, 3H), 1.28 (s, 9H), 1.20 (t,  $J$  = 7.2 Hz, 6H).  $^{13}\text{C-NMR}$  (151 MHz,  $\text{CDCl}_3$ ):  $\delta$  = 171.3 (2C), 149.6, 141.1, 133.3, 129.8 (2C), 125.0 (2C), 115.0, 61.2 (2C), 58.5, 40.3, 38.2, 34.4, 31.3 (3C), 23.8, 13.9 (2C). HRMS (ESI): Calcd for  $[\text{C}_{22}\text{H}_{32}\text{O}_4, \text{M}+\text{Na}]^+$ : 383.2193, measured: 383.2191.

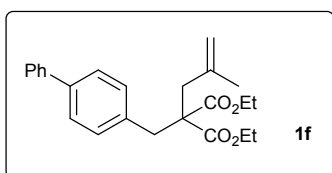

**Diethyl-2-([1,1'-biphenyl]-4-ylmethyl)-2-(2-methylallyl)malonate (1f).** 323.5 mg, 85% yield. Colourless oil.  $^1\text{H-NMR}$  (600 MHz,  $\text{CDCl}_3$ ):  $\delta$  = 7.56 (d,  $J$  = 8.4 Hz, 2H), 7.48 (d,  $J$  = 7.8 Hz, 2H), 7.42 (t,  $J$  = 7.8 Hz, 2H), 7.33 (d,  $J$  = 7.2 Hz, 1H), 7.21 (d,  $J$  = 7.8 Hz, 2H), 4.94 (s, 1H), 4.84 (s, 1H), 4.12 - 4.20 (m, 4H), 3.34 (s, 2H), 2.68 (s, 2H), 1.75 (s, 3H), 1.22 (t,  $J$  = 7.2 Hz, 6H).  $^{13}\text{C-NMR}$  (151 MHz,  $\text{CDCl}_3$ ):  $\delta$  = 171.2 (2C), 141.1, 140.9, 139.7, 135.6, 130.5 (2C), 128.7 (2C), 127.2, 127.0 (2C), 126.8 (2C), 115.0, 61.3 (2C), 58.5, 40.4, 38.4, 23.8, 14.0 (2C). HRMS (ESI): Calcd for  $[\text{C}_{24}\text{H}_{28}\text{O}_4, \text{M}+\text{Na}]^+$ : 403.1880, measured: 403.1868.

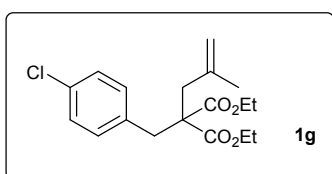

**Diethyl-2-(4-chlorobenzyl)-2-(2-methylallyl)malonate (1g).** 254.0 mg, 75% yield. White solid. mp: 46-47 °C.  $^1\text{H-NMR}$  (600 MHz,  $\text{CDCl}_3$ ):  $\delta$  = 7.54 (d,  $J$  = 8.4 Hz, 2H), 7.29 (d,  $J$  = 8.4 Hz, 2H), 4.94 (s, 1H), 4.80 (s, 1H), 4.08 - 4.18 (m, 4H), 3.31 (s, 2H), 2.66 (s, 2H), 1.71 (s, 3H), 1.20 (t,  $J$  = 7.2 Hz, 6H).  $^{13}\text{C-NMR}$  (151 MHz,  $\text{CDCl}_3$ ):  $\delta$  = 170.7 (2C), 142.5, 140.5, 131.8 (2C), 131.0 (2C), 115.5, 110.8, 61.5 (2C), 58.2, 41.0, 38.8, 23.5, 13.9 (2C). HRMS (ESI): Calcd for  $[\text{C}_{18}\text{H}_{23}\text{ClO}_4, \text{M}+\text{Na}]^+$ : 361.1177, measured: 361.1180.

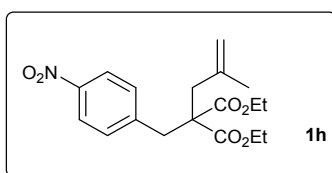

**Diethyl-2-(2-methylallyl)-2-(4-nitrobenzyl)malonate (1h).** 262.0 mg, 75% yield. White solid. mp: 38-39 °C.  $^1\text{H-NMR}$  (600 MHz,  $\text{CDCl}_3$ ):  $\delta$  = 8.11 (d,  $J$  = 8.4 Hz, 2H), 7.34 (d,  $J$  = 8.4 Hz, 2H), 4.95 (s, 1H), 4.81 (s, 1H), 4.09 - 4.19 (m, 4H), 3.36 (s, 2H), 2.67 (s, 2H),

## SUPPORTING INFORMATION

1.72 (s, 3H), 1.20 (t,  $J = 7.2$  Hz, 6H).  $^{13}\text{C-NMR}$  (151 MHz,  $\text{CDCl}_3$ ):  $\delta = 170.7$  (2C), 147.0, 144.6, 140.5, 131.1 (2C), 123.2 (2C), 115.5, 61.6 (2C), 58.2, 41.0, 38.6, 23.5, 13.9 (2C). HRMS (ESI): Calcd for  $[\text{C}_{18}\text{H}_{23}\text{NO}_6, \text{M}+\text{Na}]^+$ : 372.1418, measured: 372.1423.

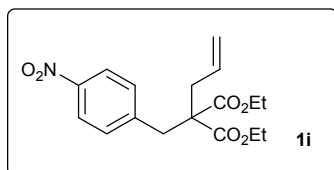

**Diethyl-2-allyl-2-(4-nitrobenzyl) malonate (1i).** 251.4 mg, 75 % yield. White solid. mp: 66-67 °C.  $^1\text{H-NMR}$  (600 MHz,  $\text{CDCl}_3$ ):  $\delta = 8.13$  (d,  $J = 8.4$  Hz, 2H), 7.31 (d,  $J = 8.4$  Hz, 2H), 5.69 - 5.76 (m, 1H), 5.16 - 5.21 (m, 2H), 4.13 - 4.23 (m, 4H), 3.32 (s, 2H), 2.58 (d,  $J = 7.2$  Hz, 2H), 1.24 (t,  $J = 7.2$  Hz, 6H).  $^{13}\text{C-NMR}$  (151 MHz,  $\text{CDCl}_3$ ):  $\delta = 170.2$  (2C), 147.1, 144.2, 132.0, 131.0 (2C), 123.4 (2C), 119.8, 61.6 (2C), 58.6, 38.1, 37.0, 14.0 (2C). HRMS (ESI): Calcd for  $[\text{C}_{17}\text{H}_{21}\text{NO}_6, \text{M}+\text{Na}]^+$ : 358.1261, measured: 358.1265.

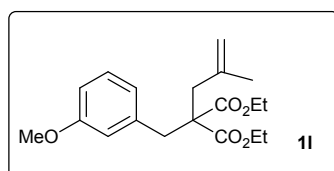

**Diethyl-2-(3-methoxybenzyl)-2-(2-methylallyl)malonate (1l).** 260.6 mg, 78 % yield. Colourless oil.  $^1\text{H-NMR}$  (600 MHz,  $\text{CDCl}_3$ ):  $\delta = 7.15$  (t,  $J = 7.8$  Hz, 1H), 6.76 (d,  $J = 8.4$  Hz, 1H), 6.71 (d,  $J = 9.0$  Hz, 2H), 4.92 (s, 1H), 4.82 (s, 1H), 4.11 - 4.19 (m, 4H), 3.76 (s, 3H), 3.28 (s, 2H), 2.65 (s, 2H), 1.73 (s, 3H), 1.22 (t,  $J = 7.2$  Hz, 6H).  $^{13}\text{C-NMR}$  (151 MHz,  $\text{CDCl}_3$ ):  $\delta = 171.2$  (2C), 159.3, 141.1, 137.9, 129.0, 122.5, 115.9, 114.9, 112.2, 61.3 (2C), 58.3, 55.1, 40.1, 38.6, 23.8, 14.0 (2C). HRMS (ESI): Calcd for  $[\text{C}_{19}\text{H}_{26}\text{O}_5, \text{M}+\text{Na}]^+$ : 357.1672, measured: 357.1679.

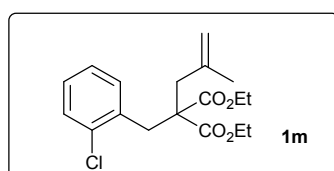

**Diethyl-2-(2-chlorobenzyl)-2-(2-methylallyl)malonate (1m).** **1m** can't be completely separated from the reaction mixture. 202.9 mg, 60 % yield. Colourless oil.  $^1\text{H-NMR}$  (600 MHz,  $\text{CDCl}_3$ ):  $\delta = 7.34 - 7.35$  (m, 1H), 7.30 - 7.32 (m, 1H), 7.12 - 7.17 (m, 2H), 4.89 (s, 1H), 4.77 (s, 1H), 4.07 - 4.18 (m, 4H), 3.50 (s, 2H), 2.73 (s, 2H), 1.72 (s, 3H), 1.17 (t,  $J = 7.2$  Hz, 6H).  $^{13}\text{C-NMR}$  (151 MHz,  $\text{CDCl}_3$ ):  $\delta = 171.1$  (2C), 141.1, 135.2, 134.9, 131.8, 129.4, 128.0, 126.4, 114.6, 61.4 (2C), 57.7, 41.4, 35.5, 23.9, 13.8 (2C). HRMS (ESI): Calcd for  $[\text{C}_{18}\text{H}_{23}\text{ClO}_4, \text{M}+\text{Na}]^+$ : 361.1177, measured: 361.1174.

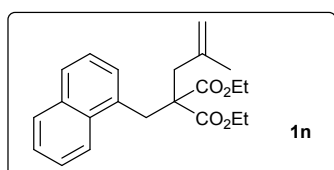

**Diethyl-2-(2-methylallyl)-2-(naphthalen-1-ylmethyl)malonate (1n).** 301.3 mg, 85% yield. Colourless oil.  $^1\text{H-NMR}$  (600 MHz,  $\text{CDCl}_3$ ):  $\delta = 8.07$  (d,  $J = 8.4$  Hz, 1H), 7.80 (d,  $J = 9.6$  Hz, 1H), 7.71 (d,  $J = 8.4$  Hz, 1H), 7.40 - 7.46 (m, 3H), 7.36 (t,  $J = 8.4$  Hz, 1H), 4.94

## SUPPORTING INFORMATION

(s, 1H), 4.86 (s, 1H), 3.96 - 4.02 (m, 2H), 3.87 - 3.93 (m, 2H), 3.83 (s, 2H), 2.76 (s, 2H), 1.73 (s, 3H), 1.05 (t,  $J = 7.2$  Hz, 6H).  $^{13}\text{C-NMR}$  (151 MHz,  $\text{CDCl}_3$ ):  $\delta = 171.4$  (2C), 141.4, 133.8, 133.2, 132.9, 128.7, 128.1, 127.5, 125.6, 125.4, 125.1, 124.0, 114.3, 61.3 (2C), 58.3, 41.1, 34.2, 24.0, 13.7 (2C). HRMS (ESI): Calcd for  $[\text{C}_{22}\text{H}_{26}\text{O}_4, \text{M}+\text{Na}]^+$ : 377.1723, measured: 377.1730.

Synthesis of substrates **1o-1q**:<sup>[3]</sup>

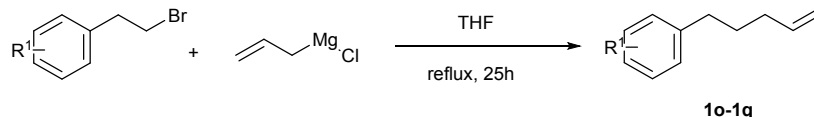

### 2. Synthesis of substrates **3**.

Substrates **3a-3e** were synthesized according to the literature, and the NMR spectroscopy were consistent with reported data.<sup>[2]</sup>

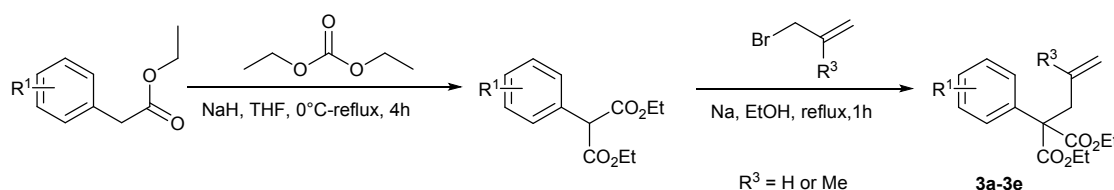

### 3. Synthesis of substrates **5**.

Substrates **5a-5i** were synthesized according to the literature, and the NMR spectroscopy were consistent with reported data.<sup>[4,5,6,7]</sup>

Substrates **5d-5f** were new compounds synthesized according to the literature.<sup>[5]</sup> The NMR spectroscopy were as follow:

Synthesis of substrates **5a-5c**:

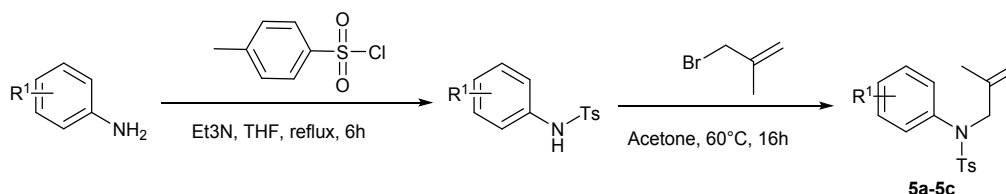

Synthesis of substrate **5d-5g** (taking **5d** as an example):

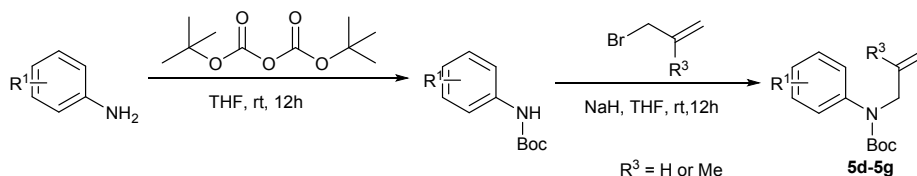

A solution of *p*-toluidine (0.54g, 5.0 mmol) and di-*tert*-butyl dicarbonate (1.28 mL, 6.0 mmol) in 20 mL of dry THF was stirred for 12 h at room temperature. The crude mixture was concentrated under reduced pressure, and purified by silica column chromatography (eluent: petroleum ether/EtOAc = 9/1, v/v) to give 0.88 g (85%) of *tert*-butyl *p*-tolylcarbamate as a white solid. The yield and NMR spectroscopy were consistent with reported data.<sup>[5]</sup>

A solution of *tert*-butyl *p*-tolylcarbamate (0.83 g, 4.0 mmol) and NaH (0.19 g, 60%, 4.8 mmol) in 15 mL of dry THF was stirred at 0 °C under  $\text{N}_2$  for 15 min. 3-Bromo-2-methylprop-1-ene (0.60 mL, 6.0 mmol) was added and the reaction was stirred at room temperature for 12 h. The reaction was quenched with water and extracted with ethyl acetate. The combined organic layers were rinsed with brine, dried over anhydrous  $\text{MgSO}_4$  and concentrated under reduced pressure. Residues were purified by silica column chromatography (eluent: petroleum ether/EtOAc = 15/1, v/v) to give **5d** as a colourless oil.

## SUPPORTING INFORMATION

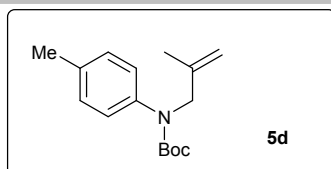

**Tert-butyl (2-methylallyl)(p-tolyl)carbamate (5d).** 835.7 mg, 80 % yield. Colourless oil.  $^1\text{H-NMR}$  (600 MHz,  $\text{CDCl}_3$ ):  $\delta$  = 7.10 - 7.13 (m, 4H), 4.83 (s, 1H), 4.80 (s, 1H), 4.14 (s, 2H), 2.31 (s, 3H), 1.74 (s, 3H), 1.44 (s, 9H).  $^{13}\text{C-NMR}$  (151 MHz,  $\text{CDCl}_3$ ):  $\delta$  = 154.8, 141.7, 140.3, 135.2, 129.1 (2C), 125.9 (2C), 111.3, 80.2, 55.9, 28.3 (3C), 20.9, 20.1. HRMS (ESI): Calcd for  $[\text{C}_{16}\text{H}_{23}\text{NO}_2, \text{M}+\text{Na}]^+$ : 284.1621, measured: 284.1630.

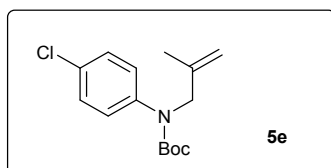

**Tert-butyl (4-chlorophenyl)(2-methylallyl)carbamate (5e).** 865.8 mg, 77 % yield. Colourless oil.  $^1\text{H-NMR}$  (600 MHz,  $\text{CDCl}_3$ ):  $\delta$  = 7.25 - 7.26 (m, 2H), 7.17 (d,  $J$  = 7.8 Hz, 2H), 4.86 (s, 1H), 4.78 (s, 1H), 4.14 (s, 2H), 1.74 (s, 3H), 1.44 (s, 9H).  $^{13}\text{C-NMR}$  (151 MHz,  $\text{CDCl}_3$ ):  $\delta$  = 154.4, 141.4, 130.9, 128.6, (2C) 127.2, 111.6, 80.7, 55.7, 28.2 (3C), 20.1. HRMS (ESI): Calcd for  $[\text{C}_{15}\text{H}_{20}\text{ClNO}_2, \text{M}+\text{Na}]^+$ : 304.1075, measured: 304.1084

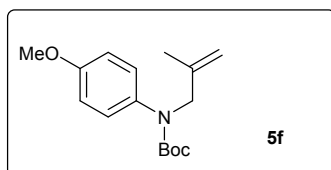

**Tert-butyl (4-methoxyphenyl)(2-methylallyl)carbamate (5f).** 909.1 mg, 82 % yield. Colourless oil.  $^1\text{H-NMR}$  (600 MHz,  $\text{CDCl}_3$ ):  $\delta$  = 7.13 (s, 2H), 6.82 (d,  $J$  = 8.4 Hz, 2H), 4.83 (s, 1H), 4.79 (s, 1H), 4.12 (s, 2H), 3.78 (s, 3H), 1.75 (s, 3H), 1.43 (s, 9H).  $^{13}\text{C-NMR}$  (151 MHz,  $\text{CDCl}_3$ ):  $\delta$  = 157.3, 155.0, 141.7, 135.8, 127.5 (2C), 113.7 (2C), 111.6, 80.1, 56.2, 55.4, 28.3 (3C), 20.1. HRMS (ESI): Calcd for  $[\text{C}_{16}\text{H}_{23}\text{NO}_3, \text{M}+\text{Na}]^+$ : 300.1570, measured: 300.1578.

Synthesis of substrate **5h**:<sup>[6]</sup>

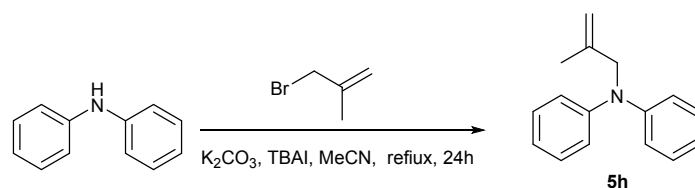

Synthesis of substrate **5i**:<sup>[7]</sup>

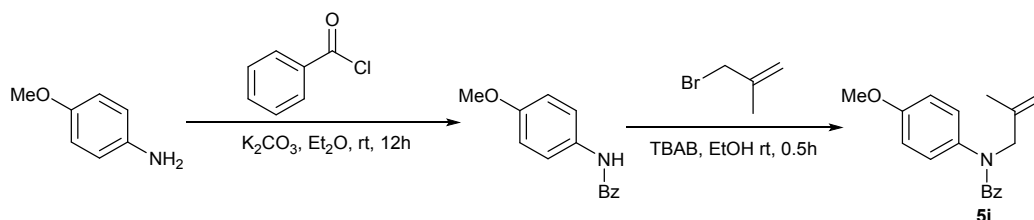

## IV. Synthetic Procedures and Analytical Data

Typical procedures for catalyst-free intramolecular aryltrifluoromethylation of unactivated alkenes (taking **1a** as an example):



## SUPPORTING INFORMATION

To a dried polytetrafluoroethylene (PTFE) sealed pressure tube was added **1a** (91.3 mg, 0.3 mmol),  $\text{PhICF}_3\text{Cl}$  (138.6 mg, 4.5 mmol) and anhydrous DMF (3.0 mL) in sequence under  $\text{N}_2$ . After the reaction mixture was stirred at 60 °C for 12 h,  $\text{PhCF}_3$  (30  $\mu\text{L}$ , 0.2436 mmol) was added as the internal standard and the NMR yield of **2a** was calculated from  $^{19}\text{F}$ -NMR integrals. Then the mixture was washed with water and brine, extracted by  $\text{CH}_2\text{Cl}_2$ . The combined organic phase was dried over anhydrous  $\text{MgSO}_4$  and concentrated under reduce pressure. The residue was purified by silica column chromatography (eluent: petroleum ether/EtOAc = 20/1 to 15/1, v/v) to give **2a** as a yellow oil.<sup>[8]</sup>

### Analytical data for compounds 2a-2o:

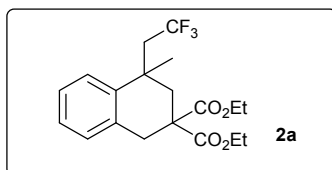

**Diethyl 4-methyl-4-(2,2,2-trifluoroethyl)-3,4-dihydronaphthalene-2,2(1H)-dicarboxylate (2a)**. 100.5 mg, 90% yield. Colourless oil.<sup>[8]</sup>  **$^1\text{H-NMR}$**  (600 MHz,  $\text{CDCl}_3$ ):  $\delta$  = 7.24 (d,  $J$  = 7.8 Hz, 1H), 7.19 - 7.22 (m, 1H), 7.14 - 7.17 (m, 2H), 4.06 - 4.24 (m, 4H), 3.32 (d,  $J$  = 16.2 Hz, 1H), 3.32 (d,  $J$  = 16.2 Hz, 1H), 2.65 (d,  $J$  = 15.0 Hz, 1H), 2.47 - 2.56 (m, 1H), 2.34 - 2.44 (m, 2H), 1.42 (s, 3H), 1.26 (t,  $J$  = 7.2 Hz, 3H), 1.19 (t,  $J$  = 7.2 Hz, 3H).  **$^{13}\text{C-NMR}$**  (151 MHz,  $\text{CDCl}_3$ ):  $\delta$  = 171.7, 171.2, 140.8, 133.2, 129.1, 126.9, 126.8, 126.4 (q,  $J$  = 277.5 Hz), 126.0, 61.7, 61.5, 52.5, 45.9 (q,  $J$  = 25.7 Hz), 39.7, 35.2, 35.1, 29.6 (q,  $J$  = 0.9 Hz), 13.9, 13.9.  **$^{19}\text{F-NMR}$**  (565 MHz,  $\text{CDCl}_3$ ):  $\delta$  = -58.8 (t,  $J$  = 11.3 Hz). HRMS (ESI): Calcd for  $[\text{C}_{19}\text{H}_{23}\text{F}_3\text{O}_4, \text{M}+\text{Na}]^+$ : 395.1441, measured: 395.1421.

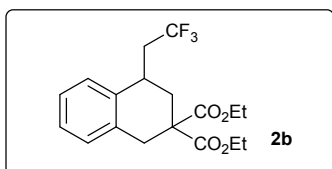

**Diethyl 4-(2,2,2-trifluoroethyl)-3,4-dihydronaphthalene-2,2(1H)-dicarboxylate (2b)**. 91.3 mg, 85% yield. Yellow oil.<sup>[8]</sup>  **$^1\text{H-NMR}$**  (600 MHz,  $\text{CDCl}_3$ ):  $\delta$  = 7.13 - 7.21 (m, 4H), 4.20 - 4.24 (m, 2H), 4.06 - 4.15 (m, 2H), 3.32 - 3.37 (m, 2H), 3.19 (d,  $J$  = 15.6 Hz, 1H), 2.84 (dd,  $J$  = 13.8 Hz, 6.0 Hz, 1H), 2.72 - 2.79 (m, 1H), 2.23 - 2.33 (m, 1H), 1.97 (dd,  $J$  = 13.8 Hz, 10.2 Hz, 1H), 1.27 (t,  $J$  = 7.2 Hz, 3H), 1.13 (t,  $J$  = 7.2 Hz, 3H).  **$^{13}\text{C-NMR}$**  (151 MHz,  $\text{CDCl}_3$ ):  $\delta$  = 171.5, 170.3, 136.2, 134.1, 129.3, 127.3 (q,  $J$  = 277.7 Hz), 126.9, 126.8, 126.7, 61.8, 61.4, 53.7, 40.9 (q,  $J$  = 27.3 Hz), 35.2, 34.8, 30.5 (q,  $J$  = 2.6 Hz), 14.0, 13.9.  **$^{19}\text{F-NMR}$**  (565 MHz,  $\text{CDCl}_3$ ):  $\delta$  = -63.5 (t,  $J$  = 10.7 Hz). HRMS (ESI): Calcd for  $[\text{C}_{18}\text{H}_{21}\text{F}_3\text{O}_4, \text{M}+\text{Na}]^+$ : 381.1284, measured: 381.1294.

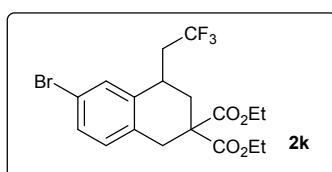

**Diethyl 6-bromo-4-(2,2,2-trifluoroethyl)-3,4-dihydronaphthalene-2,2(1H)-dicarboxylate (2k)**. 65.6 mg, 50% yield. Yellow oil.<sup>[8]</sup>  **$^1\text{H-NMR}$**  (600 MHz,  $\text{CDCl}_3$ ):  $\delta$  = 7.28 - 7.30 (m, 2H), 7.02 (d,  $J$  = 7.8 Hz, 1H), 4.22 (q,  $J$  = 7.2 Hz, 2H), 4.07 - 4.17 (m, 2H), 3.28 - 3.32

## SUPPORTING INFORMATION

(m, 2H), 3.11 (d,  $J = 16.2$  Hz, 1H), 2.82 (dd,  $J = 13.8$  Hz, 7.2 Hz, 1H), 2.68 - 2.76 (m, 1H), 2.24 - 2.33 (m, 1H), 1.95 (dd,  $J = 13.2$  Hz, 3.0 Hz, 1H), 1.27 (t,  $J = 7.2$  Hz, 3H), 1.15 (t,  $J = 7.2$  Hz, 3H).  $^{13}\text{C-NMR}$  (151 MHz,  $\text{CDCl}_3$ ):  $\delta = 171.2, 170.1, 138.5, 133.2, 130.9, 129.9, 129.8, 126.6$  (q,  $J = 277.8$  Hz), 120.5, 61.9, 61.6, 53.4, 40.6 (q,  $J = 27.6$  Hz), 34.7, 34.4, 30.5 (q,  $J = 2.3$  Hz), 14.0, 13.9.  $^{19}\text{F-NMR}$  (565 MHz,  $\text{CDCl}_3$ ):  $\delta = -63.4$  (t,  $J = 10.7$  Hz). HRMS (ESI): Calcd for  $[\text{C}_{18}\text{H}_{20}\text{BrF}_3\text{O}_4, \text{M}+\text{Na}]^+$ : 459.0389, measured: 459.0381.

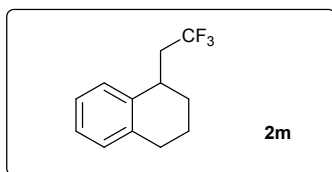

**1-(2,2,2-Trifluoroethyl)-1,2,3,4-tetrahydronaphthalene (2m).** **2m** was volatile and difficult to be isolated from the reaction mixture.  $^{19}\text{F-NMR}$  yield: 80%. Colorless oil. Its NMR spectroscopy were consistent with the literature data.<sup>[8]</sup>  $^1\text{H-NMR}$  (600 MHz,  $\text{CDCl}_3$ ):  $\delta = 6.99 - 7.06$  (m, 4H), 3.12 - 3.14 (m, 1H), 2.64 - 2.74 (m, 2H), 2.24 - 2.43 (m, 2H), 1.84 - 1.90 (m, 1H), 1.77 - 1.83 (m, 1H), 1.70 - 1.76 (m, 2H).  $^{19}\text{F-NMR}$  (565 MHz,  $\text{CDCl}_3$ ):  $\delta = -63.8$  (t,  $J = 11.3$  Hz).

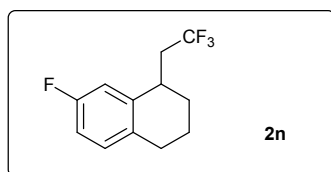

**7-Fluoro-1-(2,2,2-trifluoroethyl)-1,2,3,4-tetrahydronaphthalene (2n).** **2n** was volatile and difficult to be isolated from the reaction mixture.  $^{19}\text{F-NMR}$  yield: 71%. Colorless oil. Its NMR spectroscopy were consistent with the literature data.<sup>[8]</sup>  $^1\text{H-NMR}$  (600 MHz,  $\text{CDCl}_3$ ):  $\delta = 7.02 - 7.04$  (m, 1H), 6.82 - 6.85 (m, 2H), 3.16 - 3.20 (m, 1H), 2.67 - 2.78 (m, 2H), 2.33 - 2.48 (m, 2H), 1.92 - 1.97 (m, 1H), 1.77 - 1.87 (m, 3H).  $^{13}\text{C-NMR}$  (151 MHz,  $\text{CDCl}_3$ ):  $\delta = 161.1$  (d,  $J = 343.7$  Hz), 140.4, 132.6, 130.7 (d,  $J = 7.7$  Hz), 126.8 (q,  $J = 277.7$  Hz), 114.7 (d,  $J = 20.8$  Hz), 113.5 (d,  $J = 21.1$  Hz), 40.7 (q,  $J = 27.0$  Hz), 32.4, 28.6, 27.5, 19.1.  $^{19}\text{F-NMR}$  (565 MHz,  $\text{CDCl}_3$ ):  $\delta = -63.9$  (t,  $J = 10.8$  Hz, 3F), -117.0 (q,  $J = 7.1$  Hz, 1F).

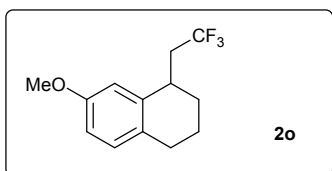

**7-Methoxy-1-(2,2,2-trifluoroethyl)-1,2,3,4-tetrahydronaphthalene (2o).** **2o** was volatile and difficult to be isolated from the reaction mixture.  $^{19}\text{F-NMR}$  yield: 89%. Colorless oil. Its NMR spectroscopy were consistent with the literature data.<sup>[8]</sup>  $^1\text{H-NMR}$  (600 MHz,  $\text{CDCl}_3$ ):  $\delta = 6.82 - 6.86$  (m, 1H), 6.72 (dd,  $J = 8.4$  Hz, 2.4 Hz, 1H), 6.66 (d,  $J = 2.4$  Hz, 1H), 3.78 (s, 3H), 3.15 - 3.19 (m, 1H), 2.65 - 2.75 (m, 2H), 2.32 - 2.50 (m, 2H), 1.90 - 1.96 (m, 1H), 1.83 - 1.87 (m, 1H), 1.73 - 1.80 (m, 2H).  $^{19}\text{F-NMR}$  (565 MHz,  $\text{CDCl}_3$ ):  $\delta = -63.9$  (t,  $J = 12.2$  Hz).

## SUPPORTING INFORMATION

### Analytical data for compounds 4a-4f:

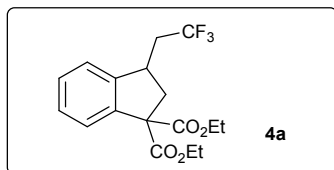

**Diethyl-3-(2,2,2-trifluoroethyl)-2,3-dihydro-1H-indene-1,1-dicarboxylate (4a).** 69.2 mg, 67% yield. Colourless oil.<sup>[8]</sup> **<sup>1</sup>H-NMR** (600 MHz, CDCl<sub>3</sub>):  $\delta$  = 7.61 (d,  $J$  = 7.2 Hz, 1H), 7.30 - 7.37 (m, 2H), 7.20 (d,  $J$  = 7.2 Hz, 1H), 4.26 (q,  $J$  = 7.2 Hz, 2H), 4.14 - 4.24 (m, 2H), 3.60 - 3.65 (m, 1H), 3.09 (dd,  $J$  = 13.8 Hz, 7.8 Hz, 1H), 2.66 - 2.75 (m, 1H), 2.45 (dd,  $J$  = 13.2 Hz, 7.2 Hz, 1H), 2.23 - 2.33 (m, 1H), 1.30 (t,  $J$  = 7.2 Hz, 3H), 1.24 (t,  $J$  = 7.2 Hz, 3H). **<sup>13</sup>C-NMR** (151 MHz, CDCl<sub>3</sub>):  $\delta$  = 170.5, 170.1, 144.8, 139.0, 129.0, 127.7, 127.0, 126.7 (q,  $J$  = 275.6 Hz), 123.4, 64.8, 61.9, 61.8, 40.6, 39.2 (q,  $J$  = 27.8 Hz), 37.0 (q,  $J$  = 2.6 Hz), 14.1, 14.0. **<sup>19</sup>F-NMR** (565 MHz, CDCl<sub>3</sub>):  $\delta$  = -64.4 (t,  $J$  = 10.7 Hz). HRMS (ESI): Calcd for [C<sub>17</sub>H<sub>19</sub>F<sub>3</sub>O<sub>4</sub>, M+Na]<sup>+</sup>: 367.1128, measured: 367.1135.

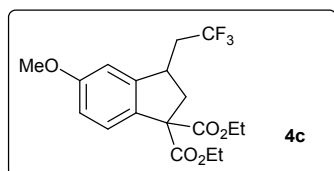

**Diethyl-5-methoxy-3-(2,2,2-trifluoroethyl)-2,3-dihydro-1H-indene-1,1-dicarboxylate (4c).** **4c** can't be completely separated from **3c**. **<sup>19</sup>F-NMR** yield: 72%. Colorless oil.<sup>[8]</sup> **<sup>1</sup>H-NMR** (600 MHz, CDCl<sub>3</sub>):  $\delta$  = 7.49 (d,  $J$  = 9.0 Hz, 1H), 6.85 - 6.87 (m, 1H), 6.70 (d,  $J$  = 2.4 Hz, 1H), 4.22 - 4.27 (m, 2H), 4.15 - 4.21 (m, 2H), 3.81 (s, 3H), 3.55 - 3.60 (m, 1H), 3.07 (dd,  $J$  = 13.8 Hz, 7.8 Hz, 1H), 2.62 - 2.71 (m, 1H), 2.45 (dd,  $J$  = 13.8 Hz, 7.8 Hz, 1H), 2.23 - 2.33 (m, 1H), 1.29 (t,  $J$  = 7.2 Hz, 3H), 1.24 (t,  $J$  = 7.2 Hz, 3H). **<sup>13</sup>C-NMR** (151 MHz, CDCl<sub>3</sub>):  $\delta$  = 170.7, 170.4, 160.7, 146.4, 131.0, 128.5 (q,  $J$  = 277.2 Hz), 127.7, 113.9, 108.6, 64.0, 61.8, 61.8, 55.5, 40.9, 39.1 (q,  $J$  = 28.7 Hz), 37.0 (q,  $J$  = 2.7 Hz), 14.1, 14.0. **<sup>19</sup>F-NMR** (565 MHz, CDCl<sub>3</sub>):  $\delta$  = -64.4 (t,  $J$  = 11.3 Hz). HRMS (ESI): Calcd for [C<sub>18</sub>H<sub>21</sub>F<sub>3</sub>O<sub>5</sub>, M+Na]<sup>+</sup>: 367.1128, measured: 367.1135.

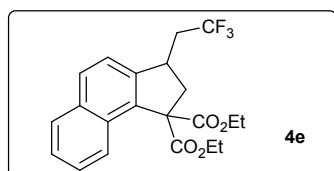

**Diethyl-3-(2,2,2-trifluoroethyl)-2,3-dihydro-1H-cyclopenta[a]naphthalene-1,1-dicarboxylate (4e).** 76.9 mg, 65% yield. Yellow oil.<sup>[8]</sup> **<sup>1</sup>H-NMR** (600 MHz, CDCl<sub>3</sub>):  $\delta$  = 7.85 (d,  $J$  = 7.8 Hz, 1H), 7.78 (d,  $J$  = 7.8 Hz, 1H), 7.53 (d,  $J$  = 7.2 Hz, 1H), 7.50 (t,  $J$  = 7.8 Hz, 1H), 7.45 (t,  $J$  = 7.2 Hz, 1H), 7.37 (d,  $J$  = 7.2 Hz, 1H), 4.33 (q,  $J$  = 7.2 Hz, 2H), 4.26 - 4.30 (m, 1H), 4.15 - 4.20 (m, 1H), 3.46 - 3.50 (m, 1H), 3.10 (dd,  $J$  = 13.2 Hz, 3.6 Hz, 1H), 2.97 - 3.06 (m, 1H), 2.51 (t,  $J$  = 12.0 Hz, 1H), 2.37 - 2.46 (m, 1H), 1.33 (t,  $J$  = 7.2 Hz, 3H), 1.26 (t,  $J$  = 7.2 Hz, 3H). **<sup>13</sup>C-NMR** (151 MHz, CDCl<sub>3</sub>):  $\delta$  = 171.3, 170.2, 134.7, 134.0, 130.2, 128.8, 128.6, 127.6, 127.0 (q,  $J$  = 275.7 Hz), 126.3, 125.5, 125.3, 122.3, 62.1, 62.1, 59.7, 38.1 (q,  $J$  = 27.6 Hz), 34.9, 30.4 (q,  $J$  = 2.4 Hz), 14.0, 13.9. **<sup>19</sup>F-NMR** (565 MHz, CDCl<sub>3</sub>):  $\delta$  = -62.8 (t,  $J$  = 11.3 Hz). HRMS (ESI): Calcd for [C<sub>21</sub>H<sub>21</sub>F<sub>3</sub>O<sub>4</sub>, M+Na]<sup>+</sup>: 417.1284, measured: 417.1291.

## SUPPORTING INFORMATION

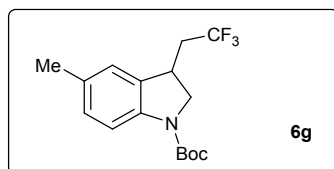

**Tert-butyl-5-methyl-3-(2,2,2-trifluoroethyl)indoline-1-carboxylate (6g).** 60.5 mg, 64% yield. Colorless oil.<sup>[8]</sup> <sup>1</sup>H-NMR (600 MHz, CDCl<sub>3</sub>): δ = 7.36 - 7.74 (br. 1H), 7.02 (d, *J* = 7.8 Hz, 1H), 6.94 (s, 1H), 4.20 (s, 1H), 3.74 (s, 1H), 3.57 - 3.61 (m, 1H), 2.56 - 2.65 (m, 1H), 2.26 - 2.35 (m, 4H), 1.56 (s, 9H). <sup>13</sup>C-NMR (151 MHz, CDCl<sub>3</sub>): δ = 152.2, 132.1, 129.0, 127.1, 126.5 (q, *J* = 277.5 Hz), 124.3, 124.2, 114.7, 81.4, 65.9, 53.8, 39.2 (q, *J* = 27.6 Hz), 28.5 (3C), 20.9. <sup>19</sup>F-NMR (470 MHz, CDCl<sub>3</sub>): δ = -64.8 (t, *J* = 11.3 Hz). HRMS (ESI): Calcd for [C<sub>16</sub>H<sub>20</sub>F<sub>3</sub>NO<sub>2</sub>, M+Na]<sup>+</sup>: 338.1338, measured: 338.1346.

### V. Mechanistic Study

**Experimental Procedures:** To a dried polytetrafluoroethene (PTFE) sealed pressure tube was added alkene **1h** (67.1 mg, 0.2 mmol), PhICF<sub>3</sub>Cl (92.4 mg, 0.3 mmol), TEMPO/BHT and anhydrous DMF (2 mL) in sequence under N<sub>2</sub>. The reaction mixture was stirred at 60 °C for 12 h, monitored by <sup>19</sup>F NMR using PhCF<sub>3</sub> (20 μL, 0.1564 mmol) as the internal standard.

**Table S8. Control experiments for trifluoromethylation of unactivated alkenes.<sup>[a]</sup>**

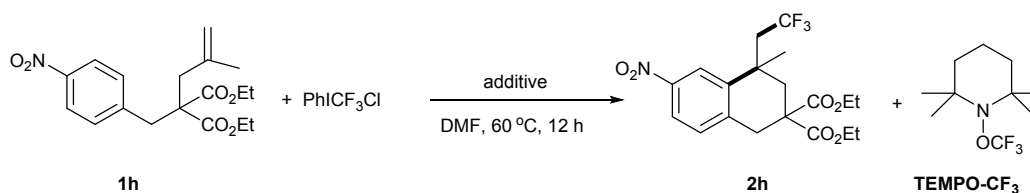

| Entry | additive | eq  | Yield of <b>2h</b> [%] <sup>[b]</sup> | TEMPO-CF <sub>3</sub> [%] <sup>[b]</sup> |
|-------|----------|-----|---------------------------------------|------------------------------------------|
| 1     | --       | --  | 91                                    | --                                       |
| 2     | TEMPO    | 1.5 | 59                                    | 0                                        |
| 3     | BHT      | 1.5 | 90                                    | --                                       |

[a] Reaction conditions: **1h** (0.2 mmol), PhICF<sub>3</sub>Cl (0.30 mmol), DMF (2 mL)

[b] <sup>19</sup>F NMR yields using PhCF<sub>3</sub> as an internal standard.

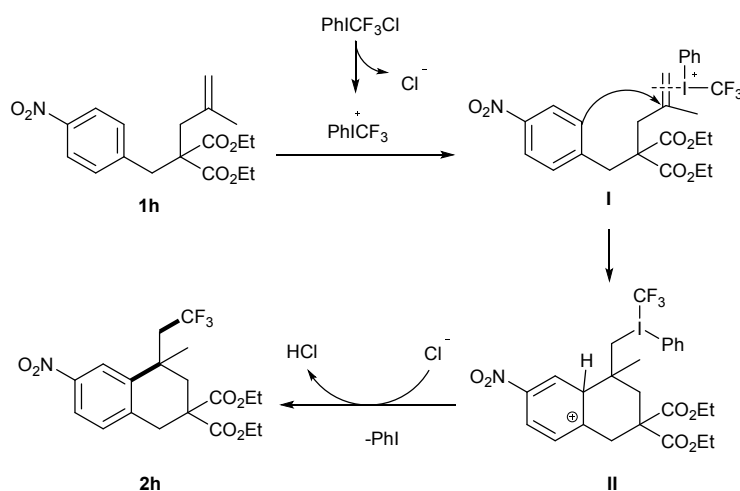

#### Plausible mechanistic:

Based on the above experimental results (**Table S7**), an ionic process is proposed as shown in **Scheme S1**. The unactivation of the alkene double bond of **1h** by [PhICF<sub>3</sub>]<sup>+</sup> affords iodonium complex I. Then exo-cyclization occurs via an attack of the aryl group affording

# SUPPORTING INFORMATION

---

cyclic intermediate **II**. Finally, the deprotonation of **II** gives trifluoromethylated product **2h** along with the elimination of PhI.

## VI. References

- [1]. C. Xu, X. Song, J. Guo, S. Chen, J. Gao, J. Jiang, F. Gao, Y. Li and M. Wang, *Org. Lett.*, 2018, **20**, 3933.
- [2]. a) D. Nečas, M. Turský and M. Katora, *J. Am. Chem. Soc.*, 2004, **126**, 10222; b) H. Zhang and K. Muñiz, *ACS Catal.*, 2017, **7**, 4122; c) Z. Zhang, H. Martinez and W. R. Dolbier, *J. Org. Chem.*, 2017, **82**, 2589; d) B. Cacciuttolo, S. Poulain-Martini and E. Duñach, *Eur. J. Org. Chem.*, 2011, **2011**, 3710; f) R. J. Armstrong, M. and D. Smith, *Angew. Chem. Int. Ed.*, 2014, **53**, 12822.
- [3]. H.-J. Zhong, B. R. Lee, J. W. Boyle, W. Wang, D.-L. Ma, P. W. H. Chan and C.-H. Leung, *Chem. Commun.*, 2016, **52**, 5788.
- [4]. a) K. Yuan, J. -F. Joulé, V. Dorcet and H. Doucet, *ACS Catal.*, 2016, **6**, 8121; b) X. Zhou and G. Dong, *Angew. Chem. Int. Ed.*, 2016, **55**, 15091.
- [5]. a) H. Lavrard and F. Popowycz, *Eur. J. Org. Chem.*, 2017, **2017**, 600; b) P. Mondal, L. Thander and S. K. Chattopadhyay, *Tetrahedron Letters*, 2012, **53**, 1328.
- [6]. P. Wipf and J. P. Maciejewski, *Org. Lett.*, 2008, **10**, 4383.
- [7]. a) P. G. Chirila, L. Skibinski, K. Miller, A. Hamilton and C. J. Whiteoak, *Adv. Synth. Catal.*, 2018, **360**, 2324; b) T. Arvind B, S. Narayan and S. Devanand, *Organic Chemistry: An Indian Journal*, 2010, **6**, 52.
- [8]. a) H. Egami, R. Shimizu, S. Kawamura and M. Sodeoka, *Angew. Chem. Int. Ed.*, 2013, **52**, 4000; b) S. Kawamura and M. Sodeoka, *Angew. Chem. Int. Ed.*, 2016, **55**, 8740.

## VIII. NMR Spectra

### 1. NMR Spectra of New Substrates

#### <sup>1</sup>H-NMR Spectra of **1c**

# SUPPORTING INFORMATION

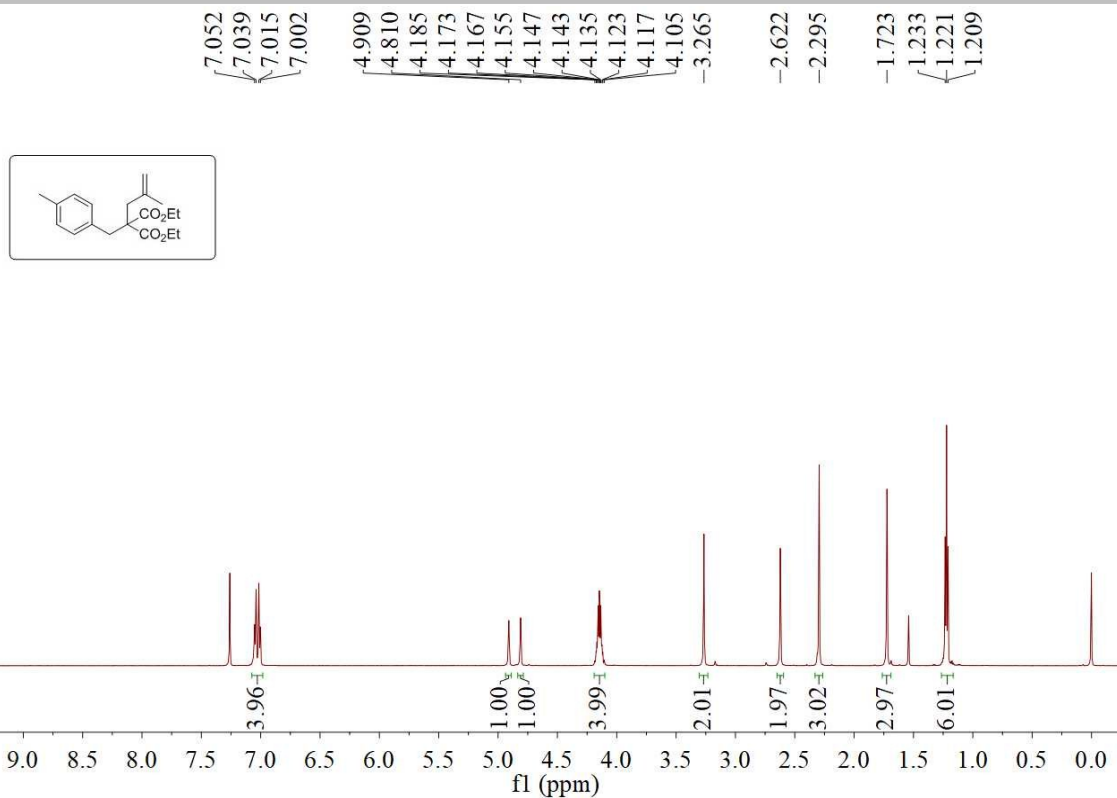

## <sup>13</sup>C-NMR Spectra of 1c

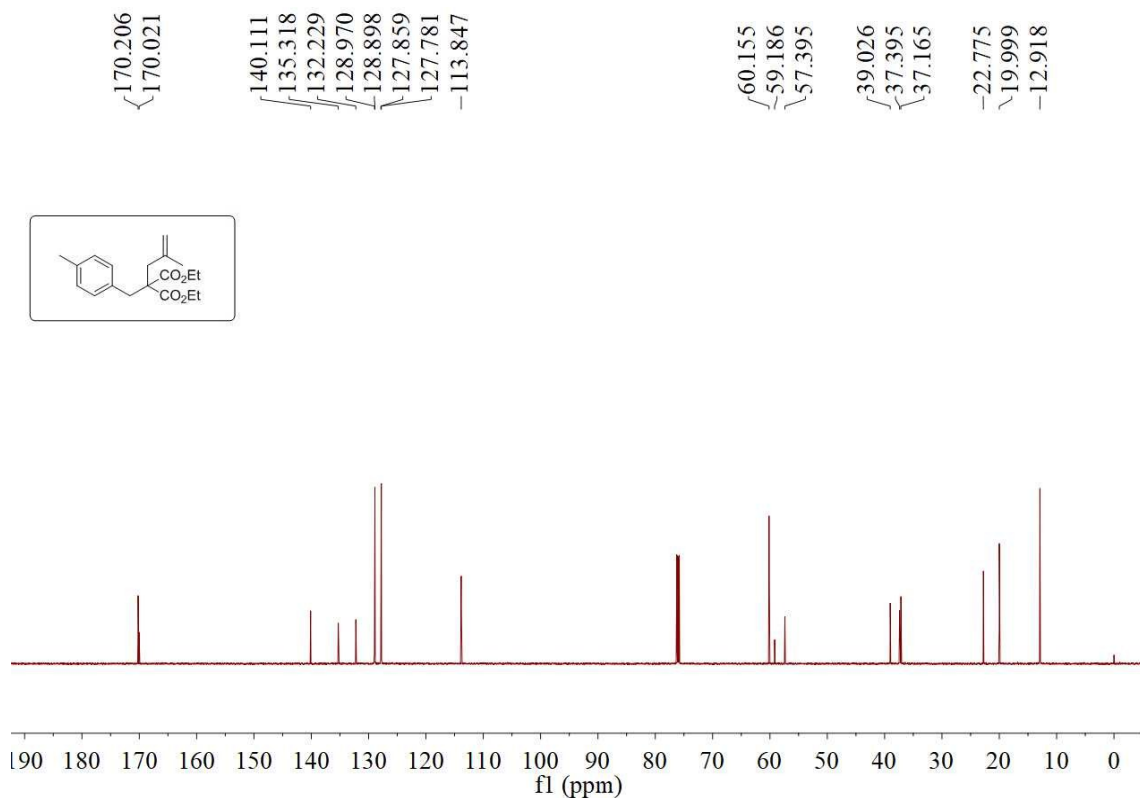

## <sup>1</sup>H-NMR Spectra of 1e

# SUPPORTING INFORMATION

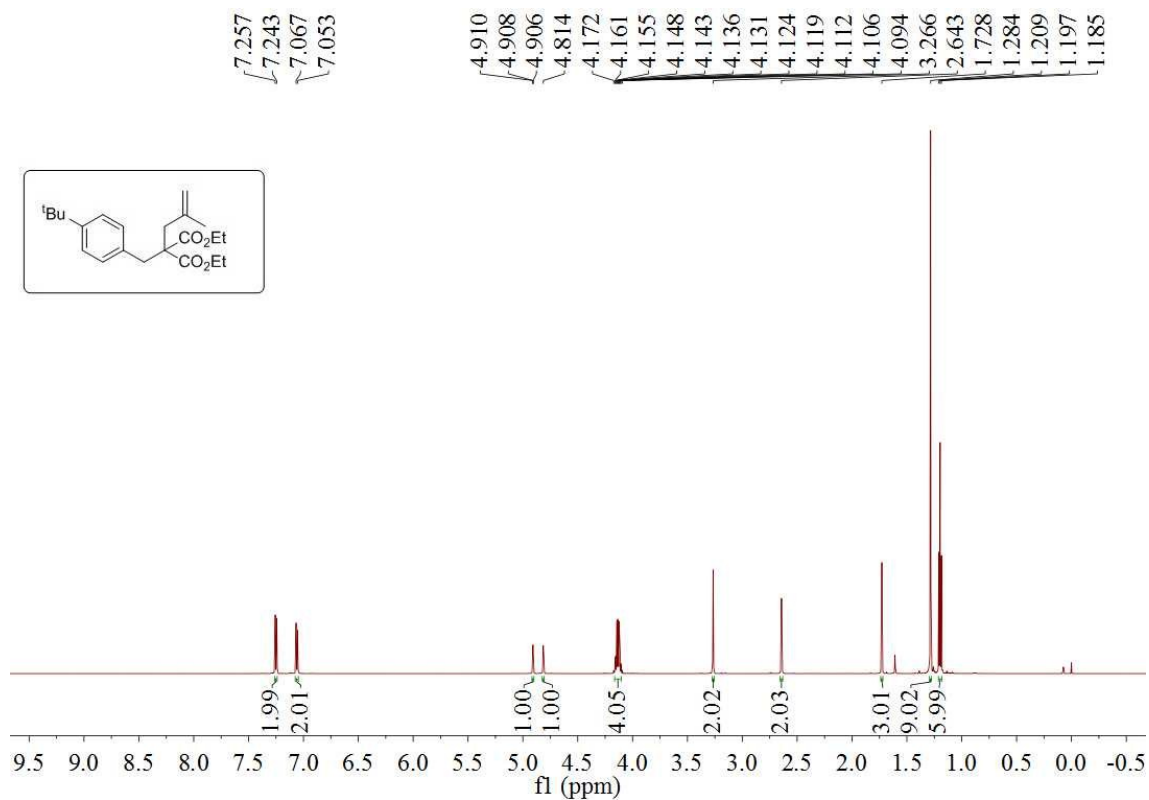

<sup>13</sup>C-NMR Spectra of 1e

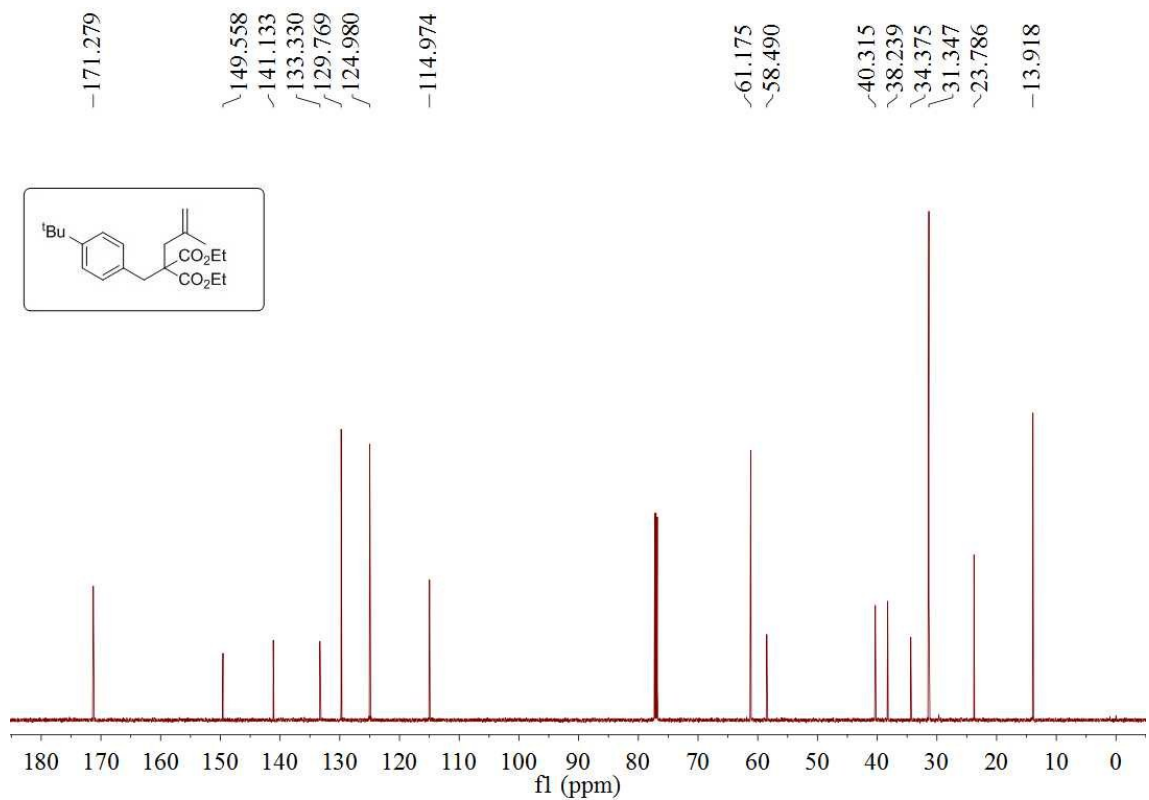

<sup>1</sup>H-NMR Spectra of 1f

# SUPPORTING INFORMATION

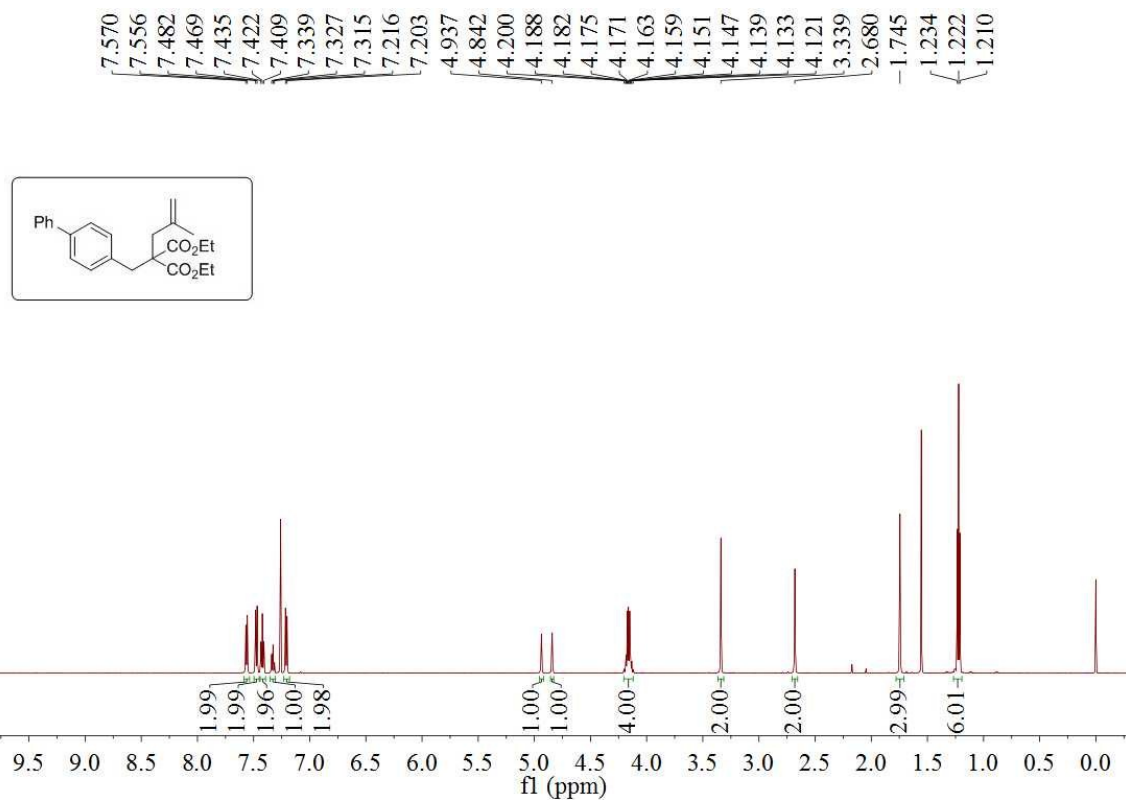

<sup>13</sup>C-NMR Spectra of 1f

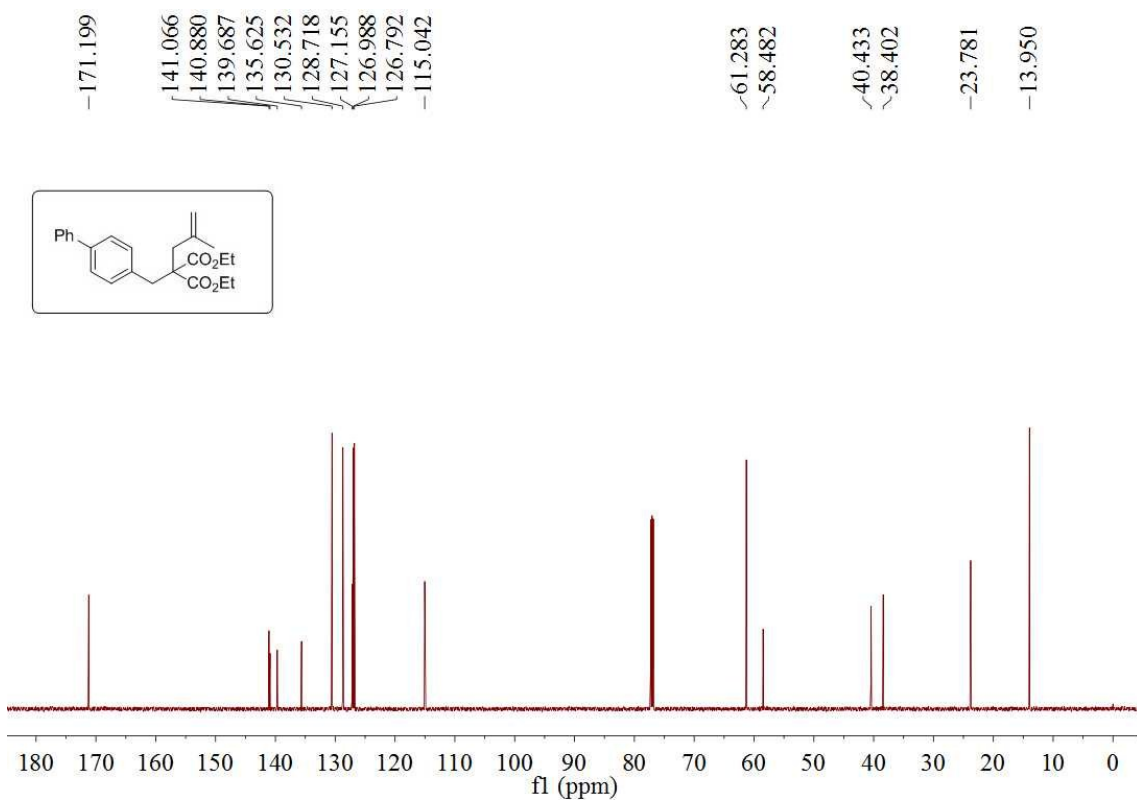

<sup>1</sup>H-NMR Spectra of 1g



# SUPPORTING INFORMATION

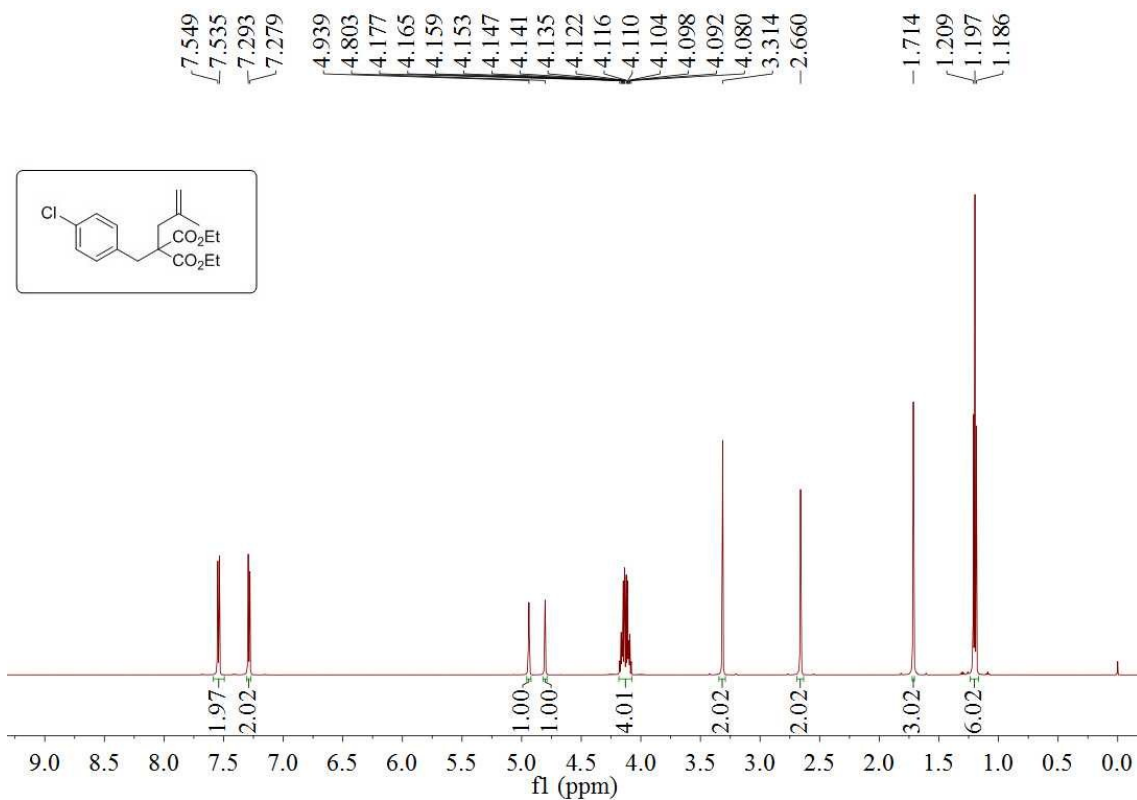

<sup>13</sup>C-NMR Spectra of 1g

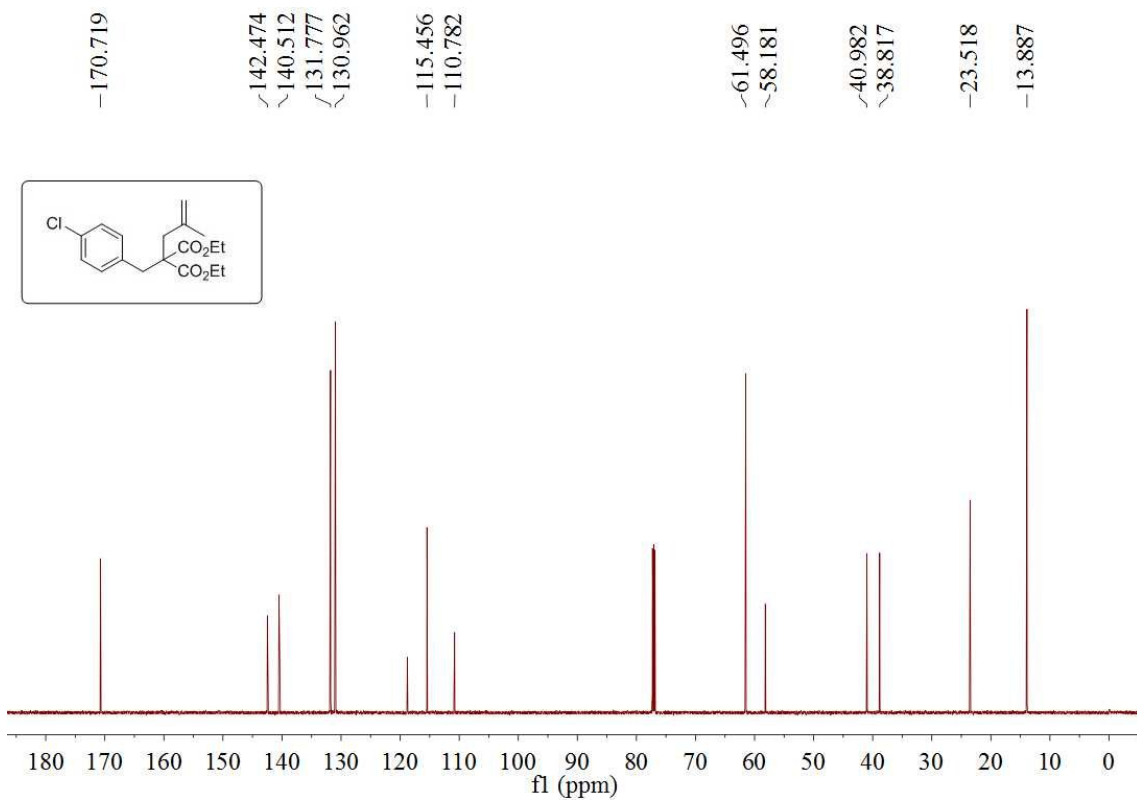

<sup>1</sup>H-NMR Spectra of 1h

# SUPPORTING INFORMATION

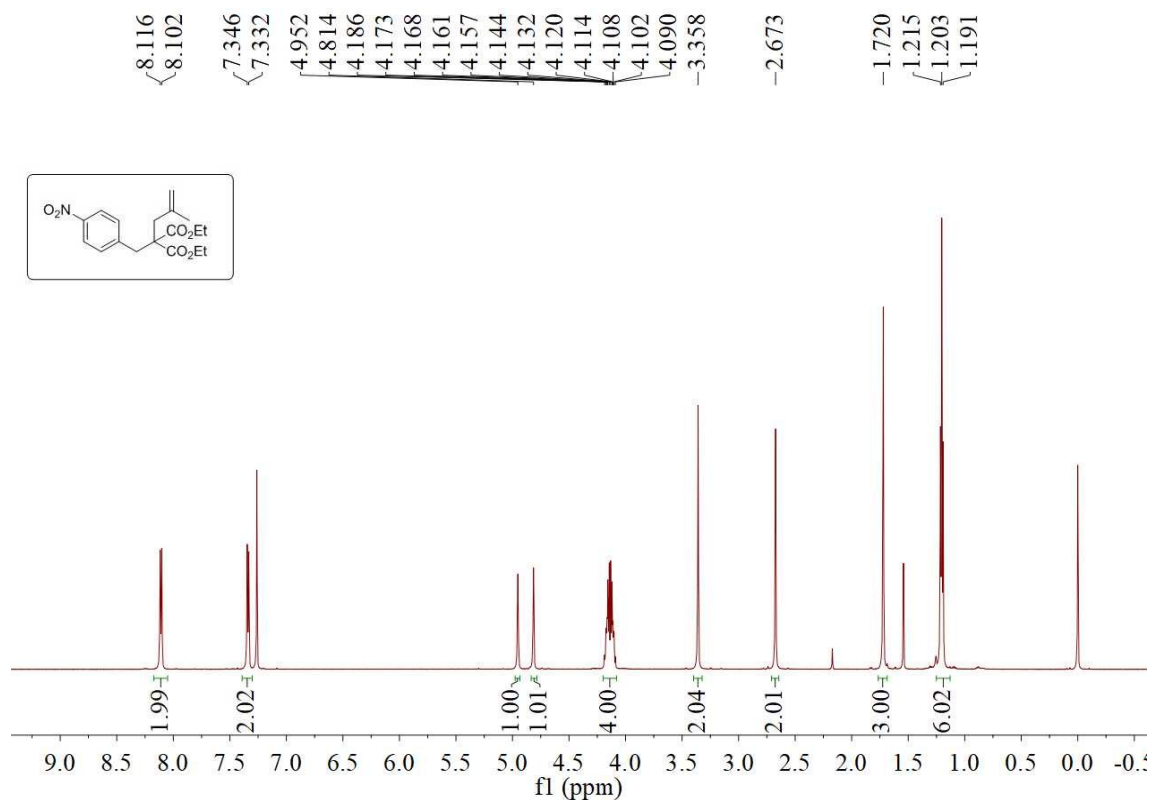

<sup>13</sup>C-NMR Spectra of 1h

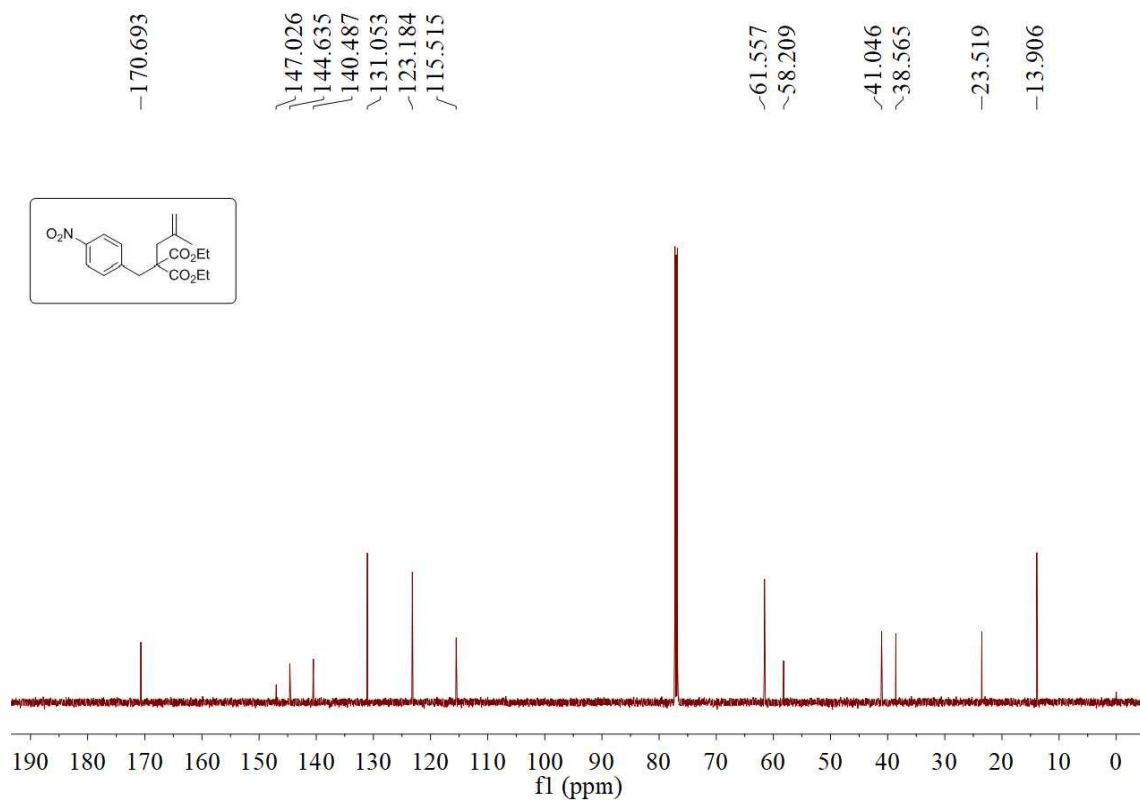

<sup>1</sup>H-NMR Spectra of 1i

# SUPPORTING INFORMATION

8.132  
8.118  
7.318  
7.304  
5.763  
5.751  
5.746  
5.735  
5.723  
5.710  
5.706  
5.694  
5.211  
5.192  
5.159  
4.230  
4.218  
4.212  
4.207  
4.201  
4.189  
4.177  
4.163  
4.157  
4.151  
4.147  
4.134  
3.315  
2.588  
2.576  
1.247  
1.235  
1.224

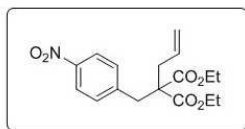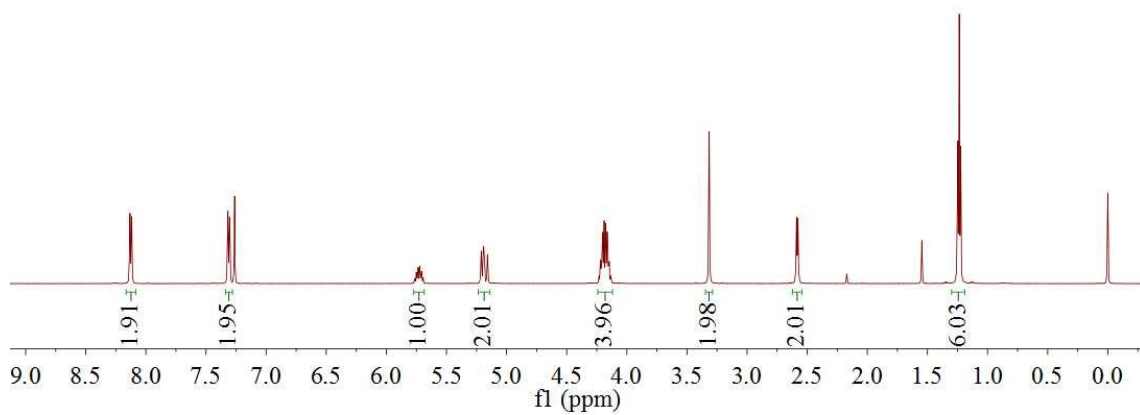

<sup>13</sup>C-NMR Spectra of 1i

170.235  
147.095  
144.181  
132.018  
130.977  
123.351  
119.811  
61.598  
58.627  
38.053  
37.011  
14.033

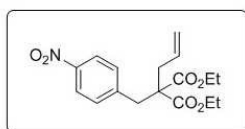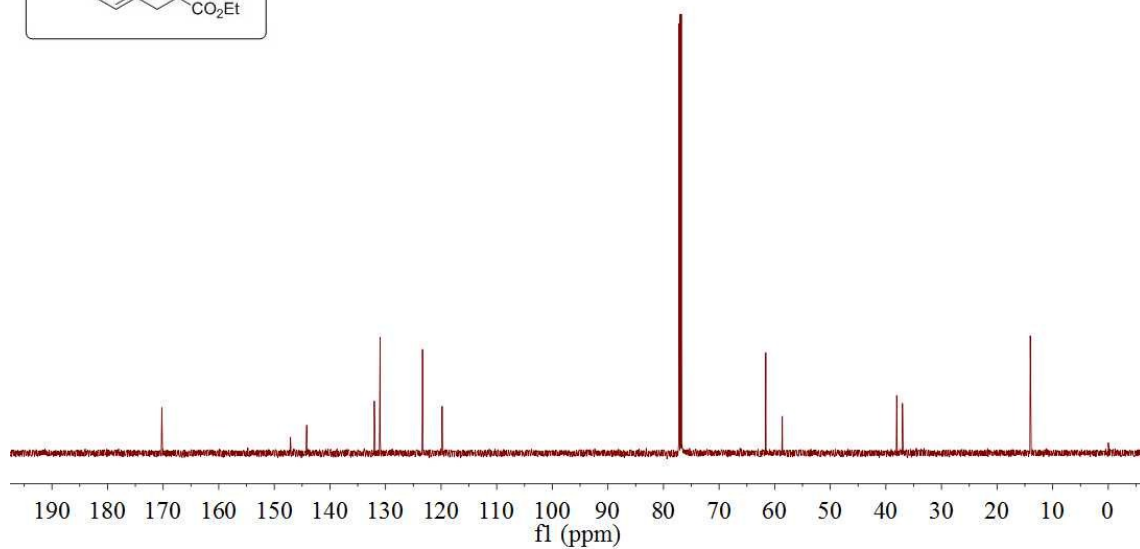

<sup>1</sup>H-NMR Spectra of 1i

# SUPPORTING INFORMATION

7.164  
7.151  
7.138  
6.762  
6.748  
6.718  
6.703  
4.918  
4.819  
4.191  
4.179  
4.173  
4.167  
4.164  
4.161  
4.152  
4.150  
4.140  
4.138  
4.129  
4.122  
4.111  
3.757  
3.281  
2.645  
-1.726  
-1.234  
-1.222  
-1.210

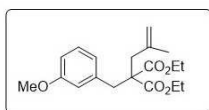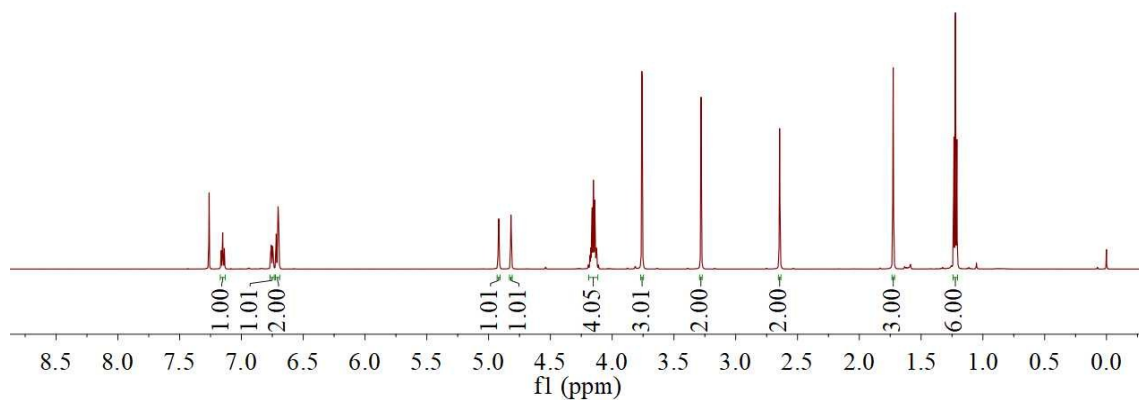

## <sup>13</sup>C-NMR Spectra of 1l

-171.161  
-159.319  
-141.101  
-137.947  
-129.024  
-122.453  
-115.903  
-114.948  
-112.199  
61.265  
58.327  
55.059  
40.079  
38.555  
-23.797  
-13.957

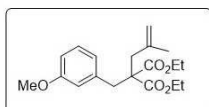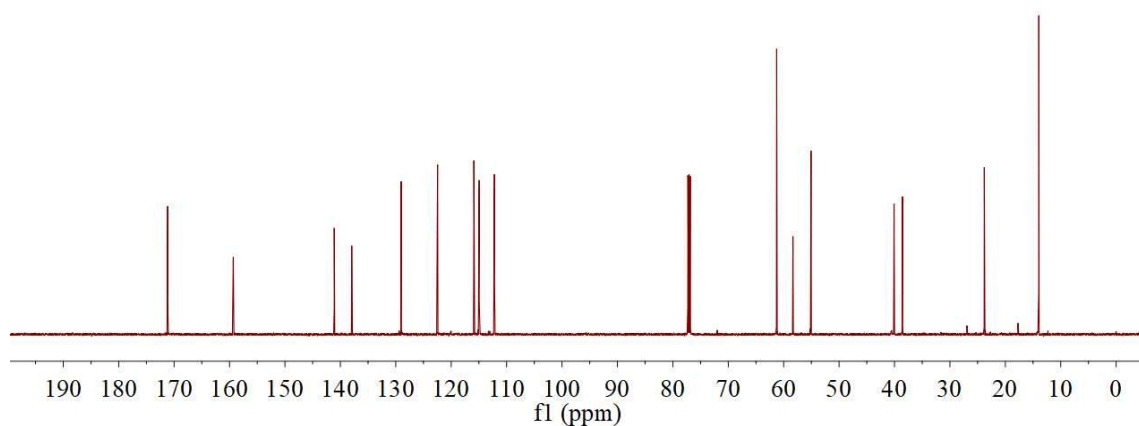

## <sup>1</sup>H-NMR Spectra of 1m

# SUPPORTING INFORMATION

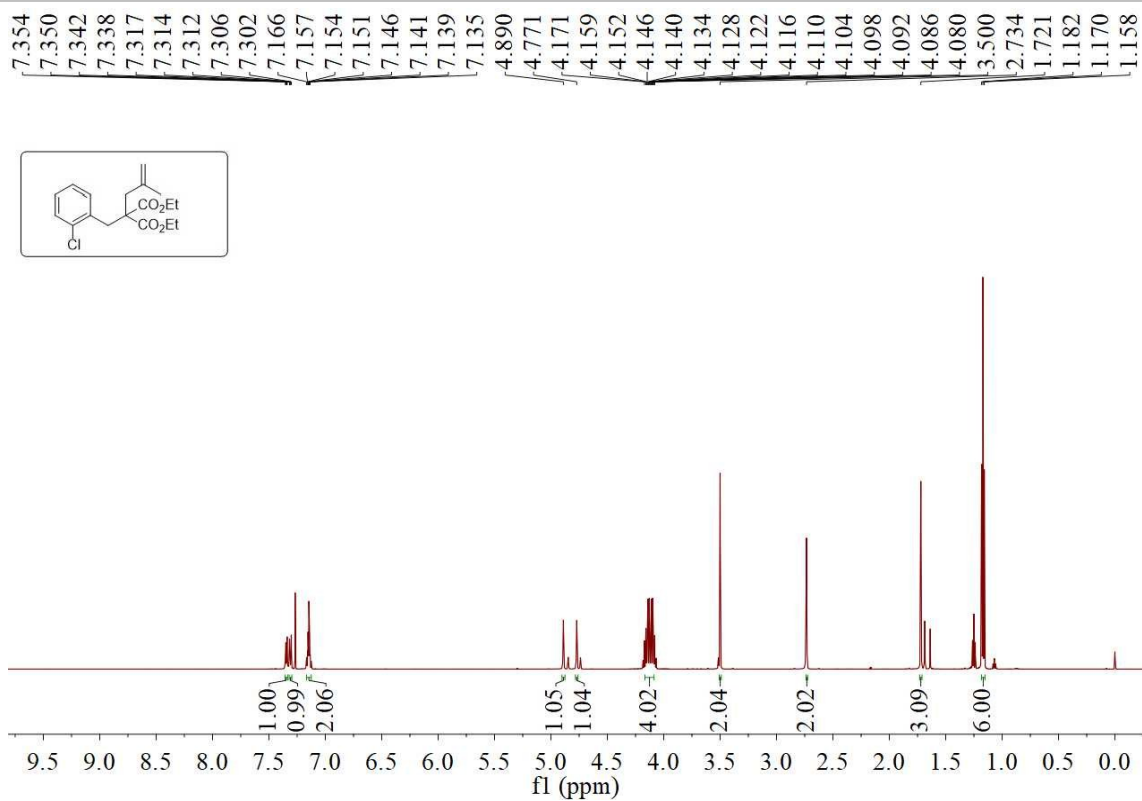

<sup>13</sup>C-NMR Spectra of 1m

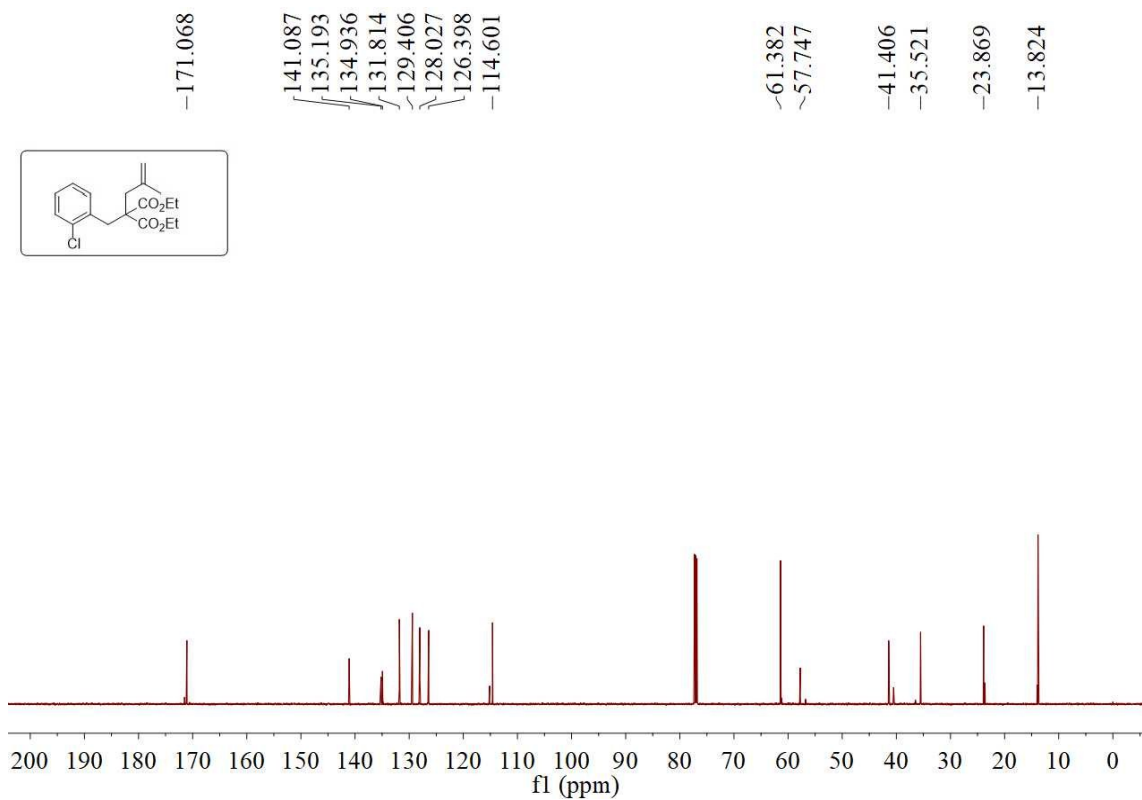

<sup>1</sup>H-NMR Spectra of 1n

# SUPPORTING INFORMATION

8.077  
8.063  
7.803  
7.787  
7.715  
7.701  
7.449  
7.446  
7.444  
7.436  
7.432  
7.430  
7.427  
7.417  
7.415  
7.376  
7.362  
7.350  
4.938  
4.862  
4.003  
3.997  
3.991  
3.985  
3.979  
3.973  
3.961  
3.928  
3.916  
3.910  
3.904  
3.898  
3.892  
3.886  
3.829  
2.759  
1.725  
1.057  
1.045  
1.033

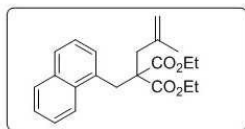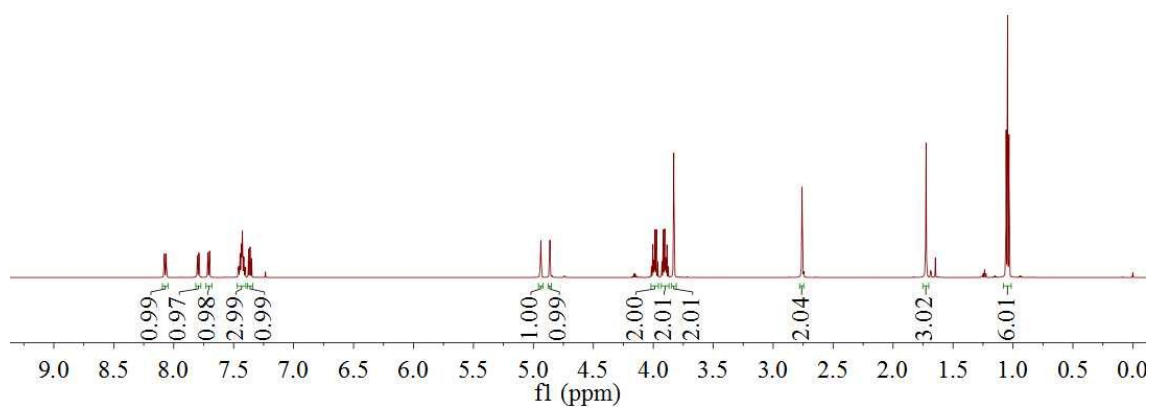

<sup>13</sup>C-NMR Spectra of 1n

-171.355  
-141.396  
-133.805  
-133.230  
-132.915  
-128.668  
-128.099  
-127.484  
-125.597  
-125.350  
-125.134  
-123.988  
-114.312  
-61.250  
-58.262  
-41.146  
-34.180  
-24.044  
-13.702

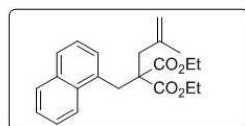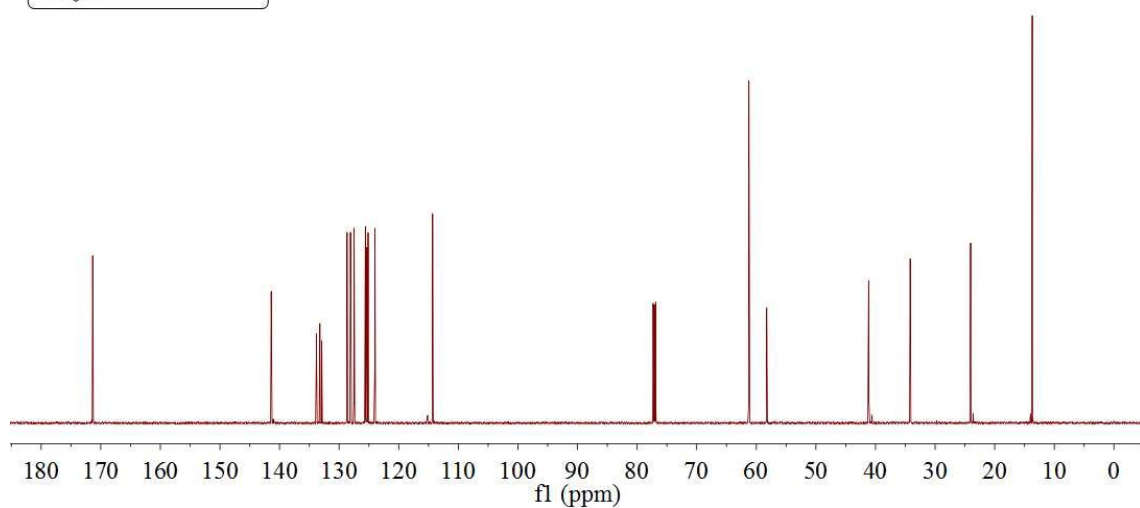

<sup>1</sup>H-NMR Spectra of 5d

# SUPPORTING INFORMATION

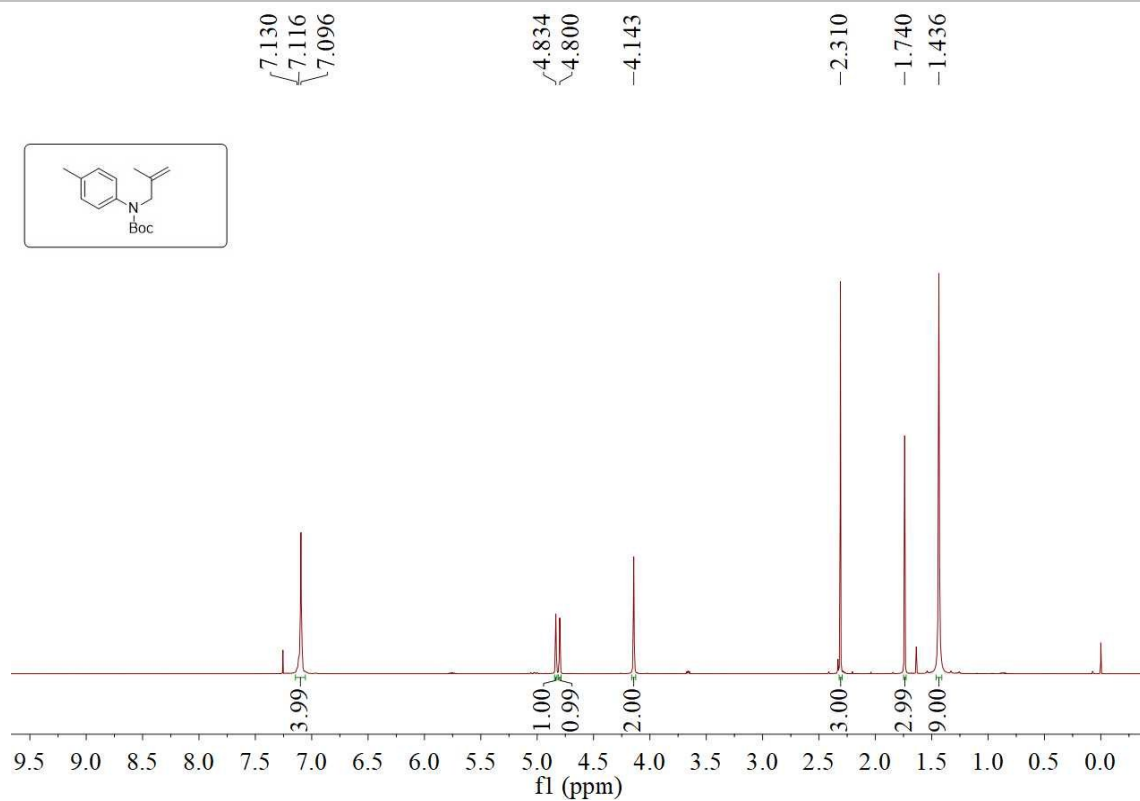

## <sup>13</sup>C-NMR Spectra of 5d

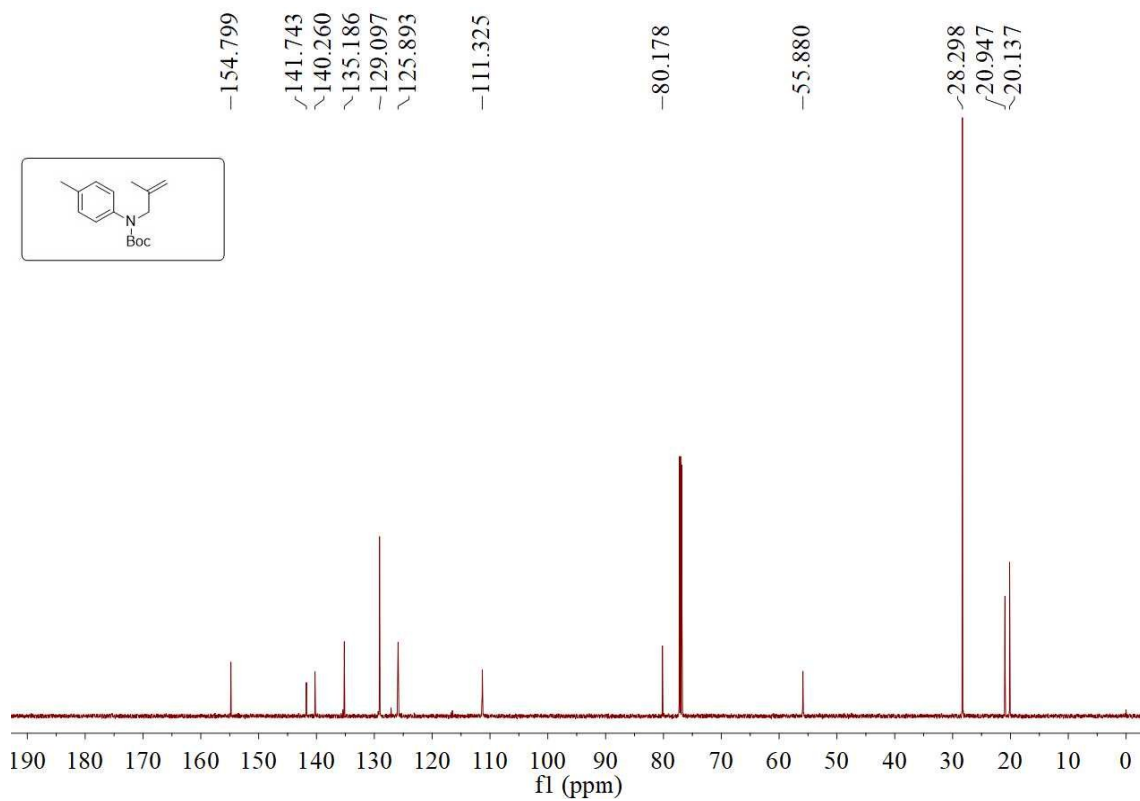

## <sup>1</sup>H-NMR Spectra of 5e

# SUPPORTING INFORMATION

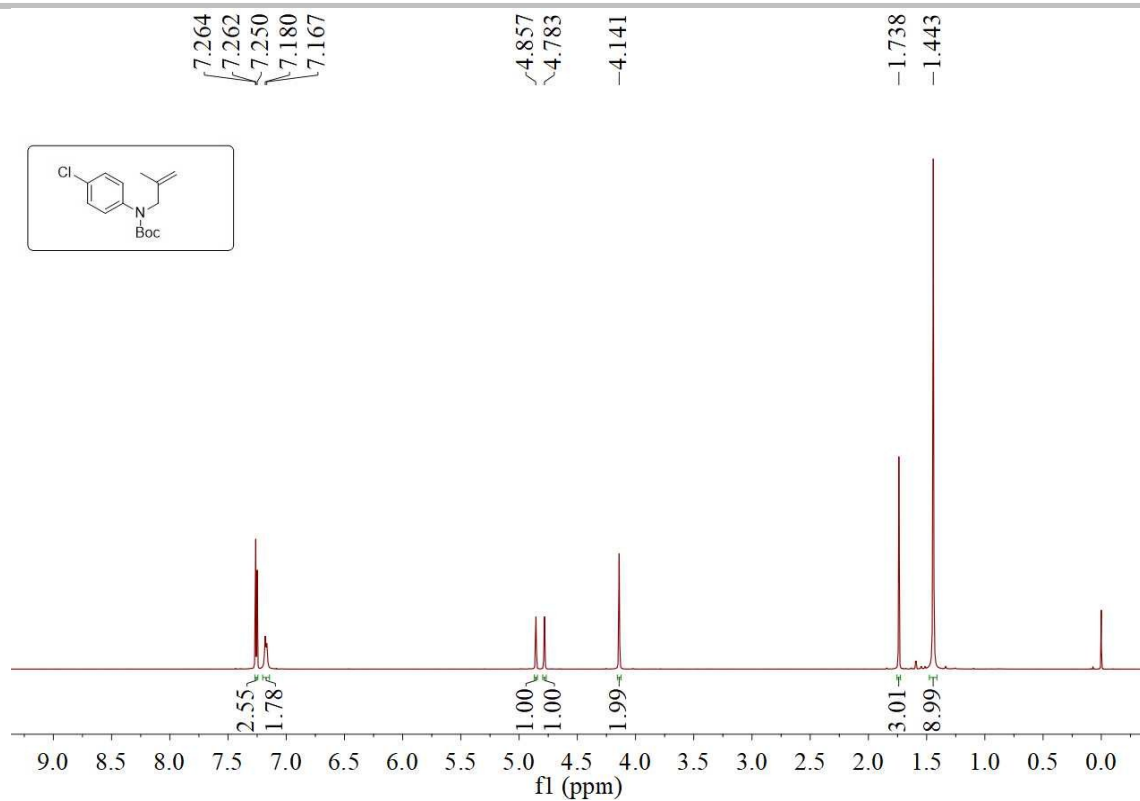

**<sup>13</sup>C-NMR Spectra of 5e**

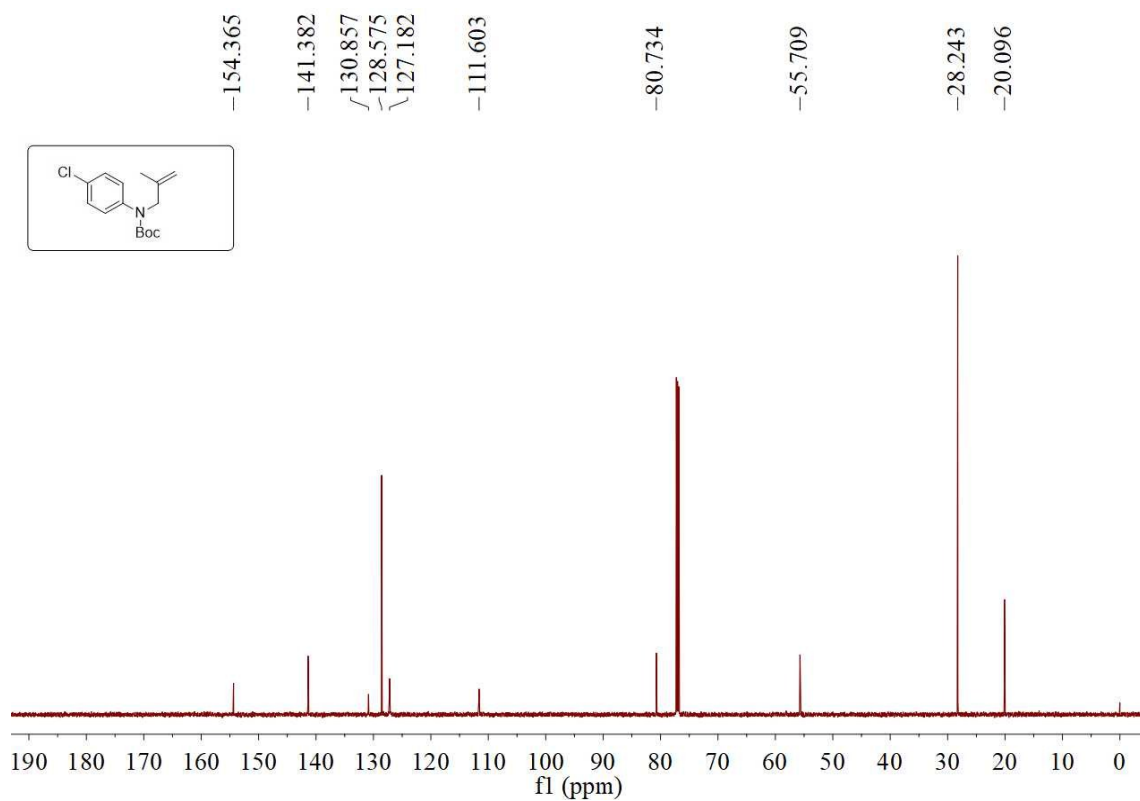

**<sup>1</sup>H-NMR Spectra of 5f**



# SUPPORTING INFORMATION

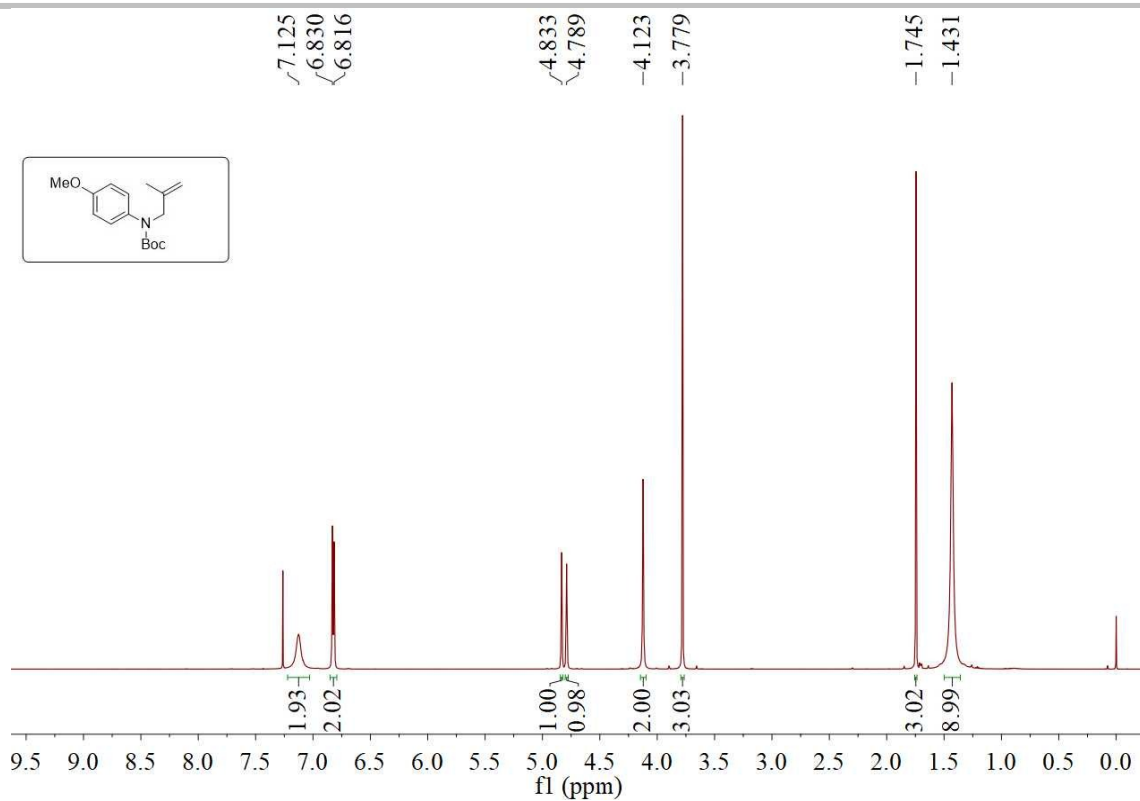

**<sup>13</sup>C-NMR Spectra of 5f**

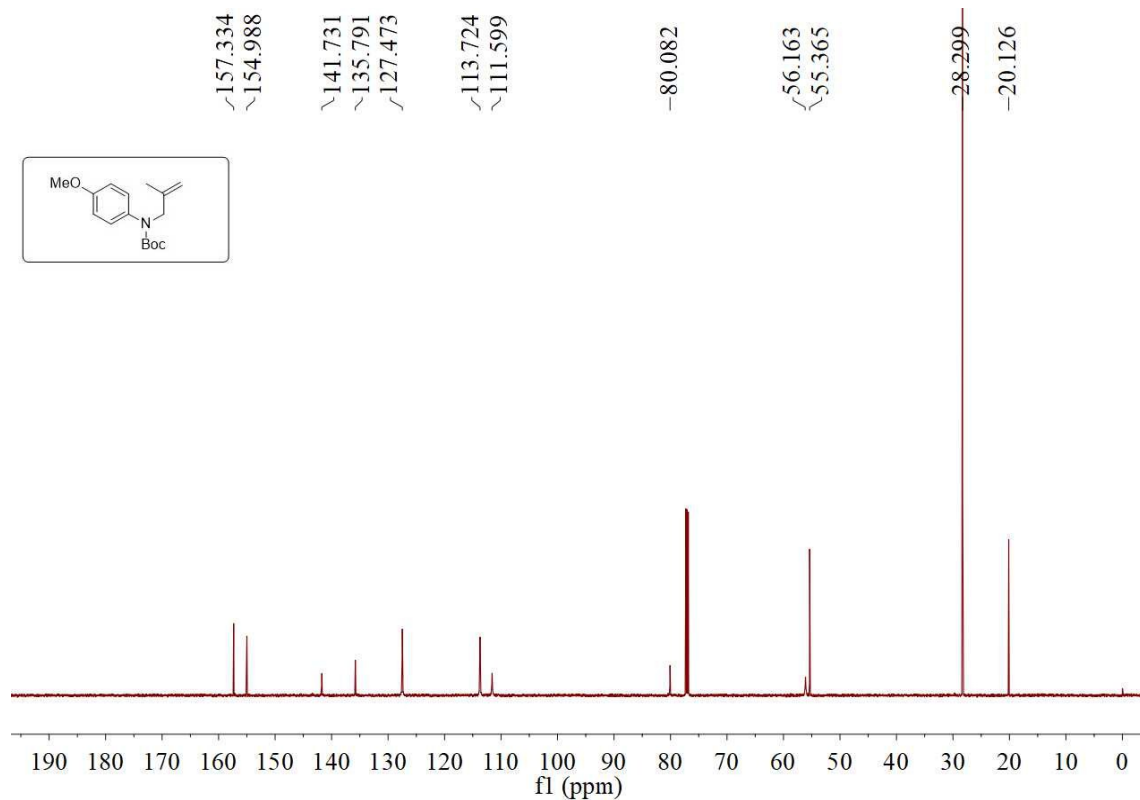

## 2. NMR Spectra of Products

### <sup>1</sup>H-NMR Spectra of 2a

# SUPPORTING INFORMATION

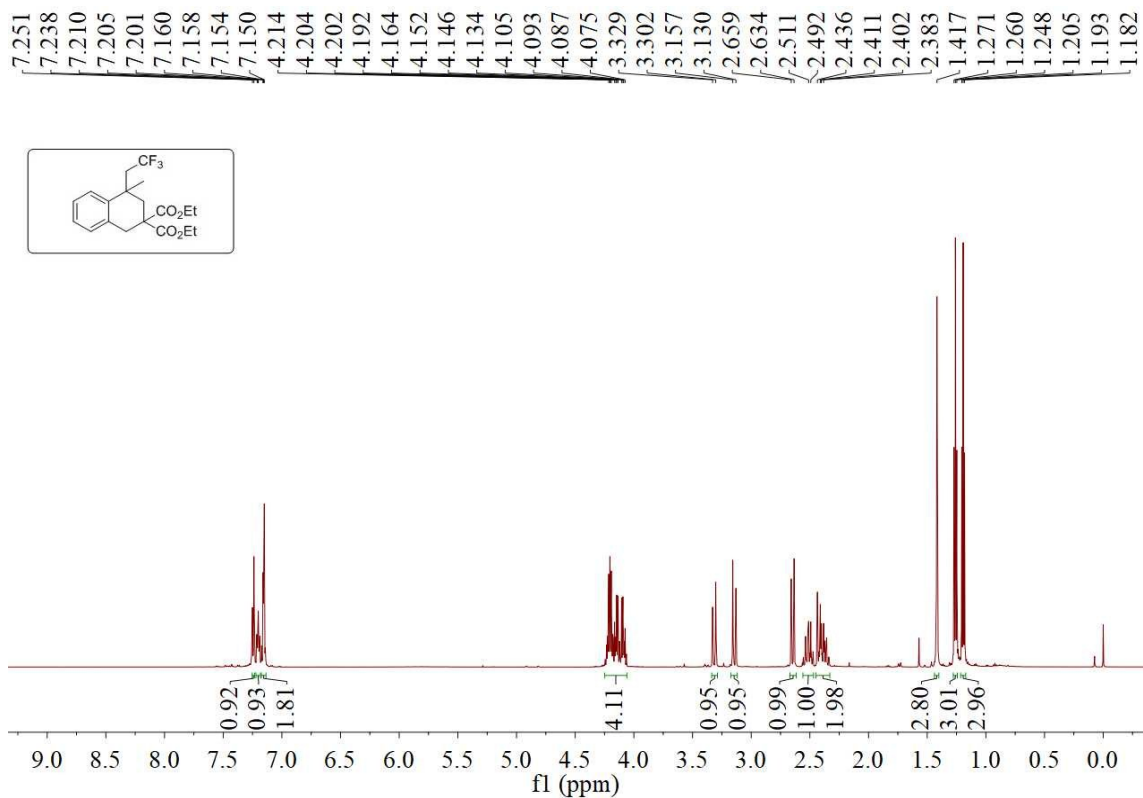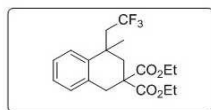

## <sup>13</sup>C-NMR Spectra of 2a

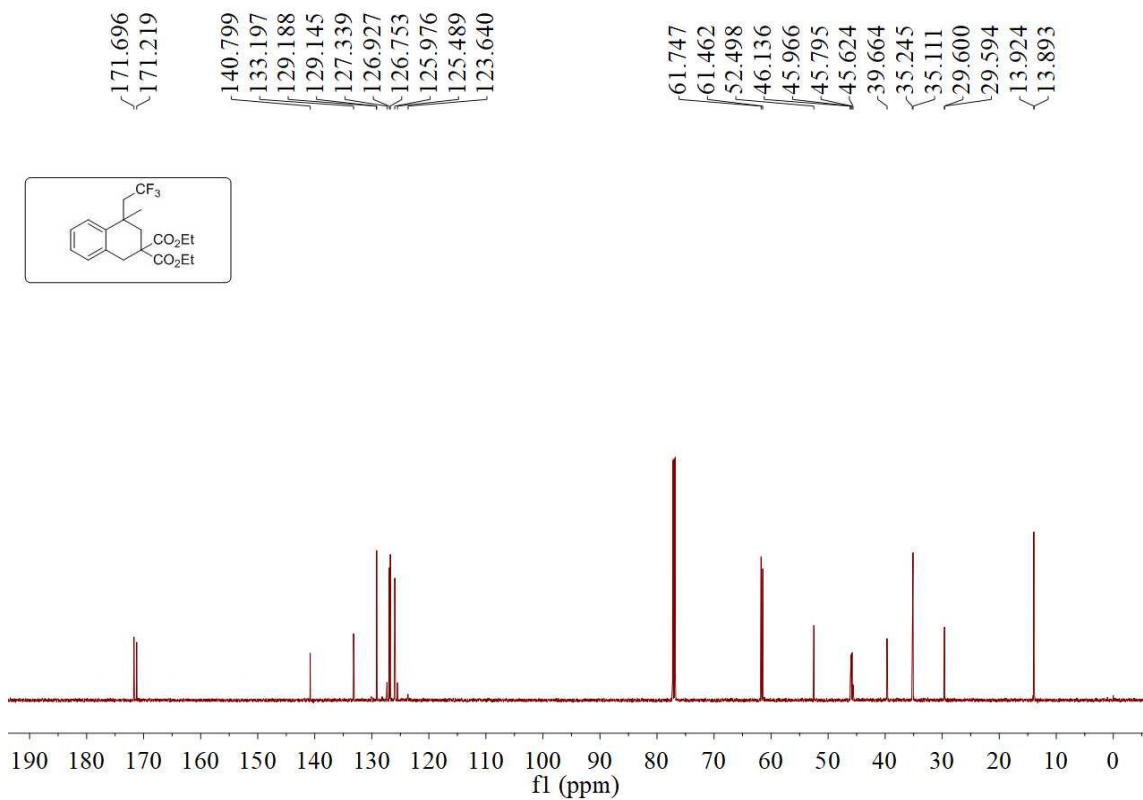

## <sup>19</sup>F-NMR Spectra of 2a

# SUPPORTING INFORMATION

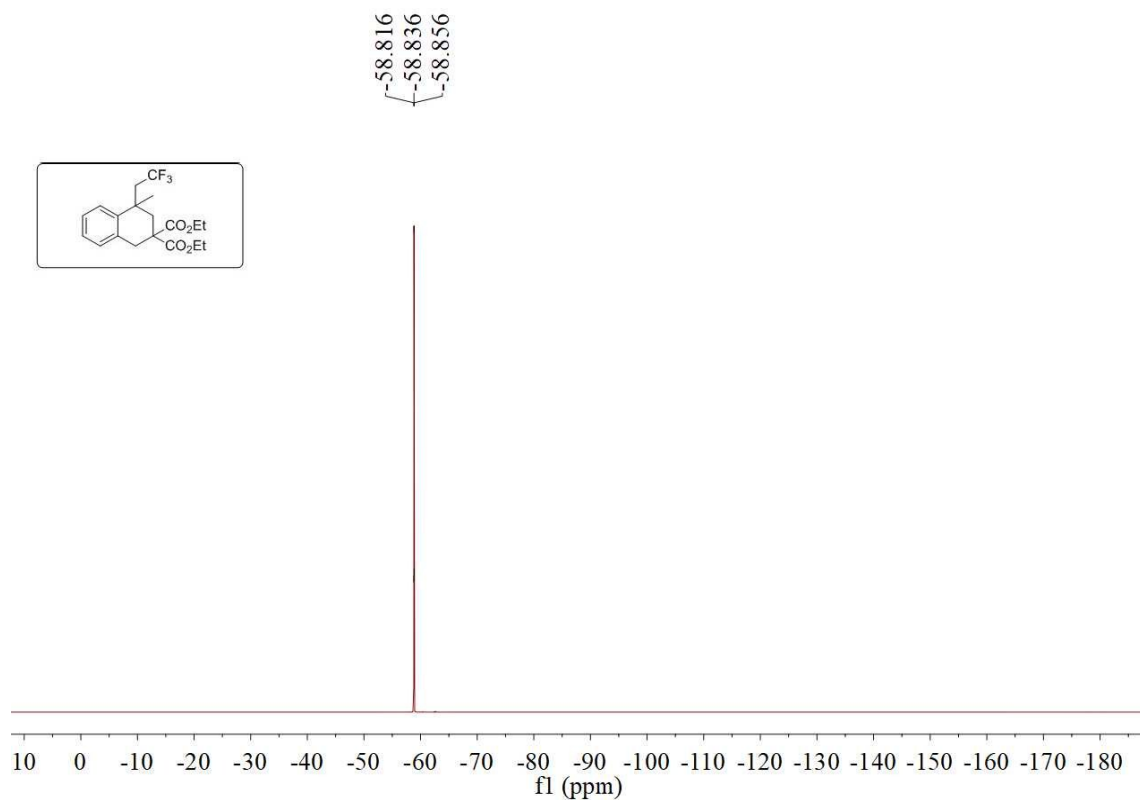

## $^1\text{H-NMR}$ Spectra of 2b

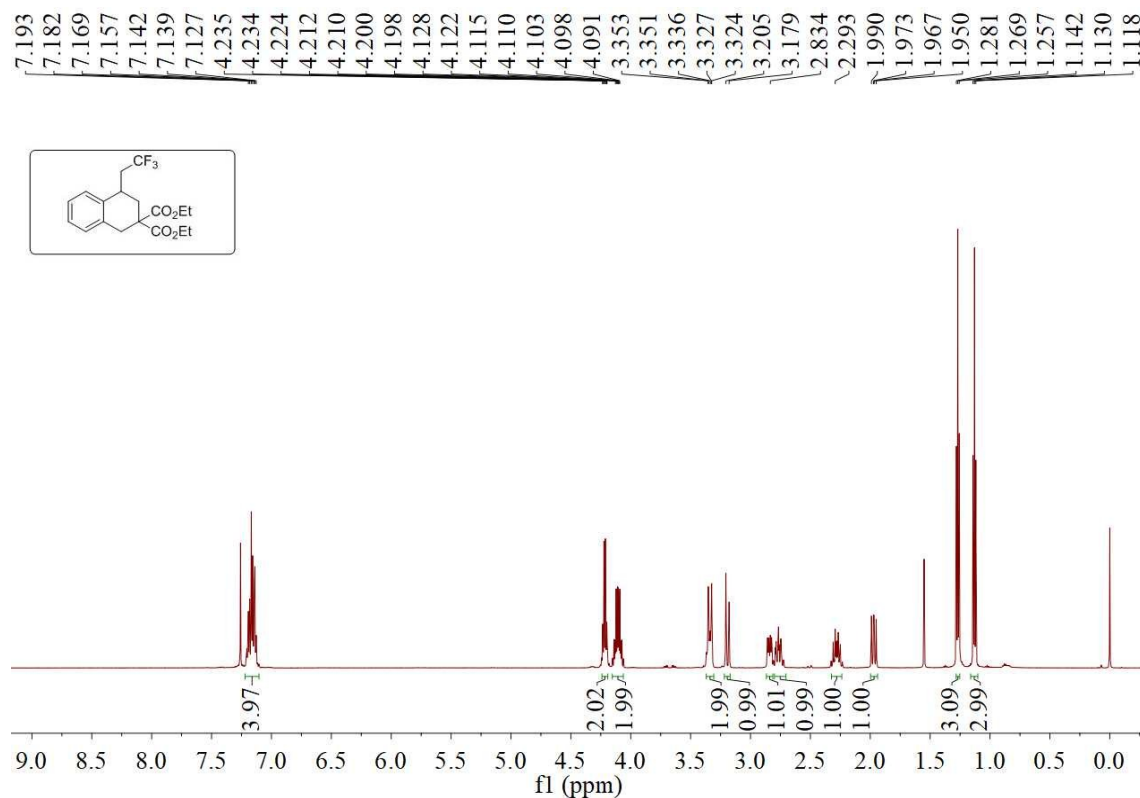

## $^{13}\text{C-NMR}$ Spectra of 2b

# SUPPORTING INFORMATION

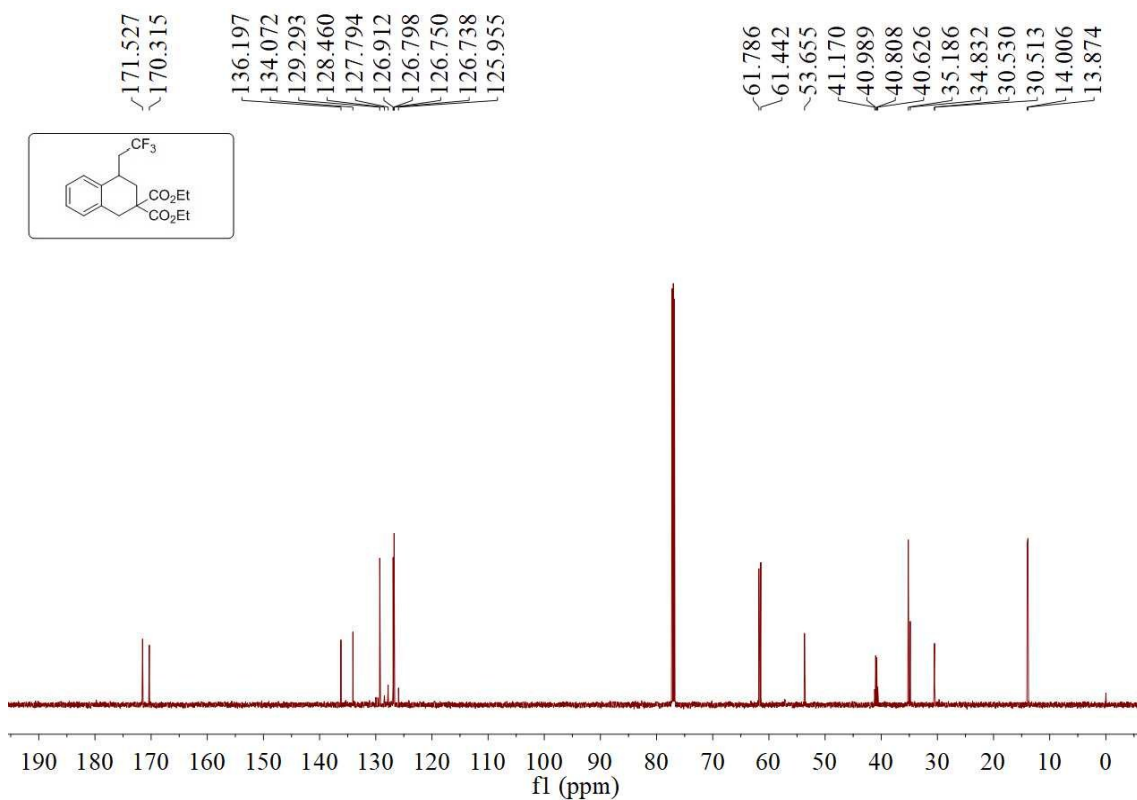

<sup>19</sup>F-NMR Spectra of 2b

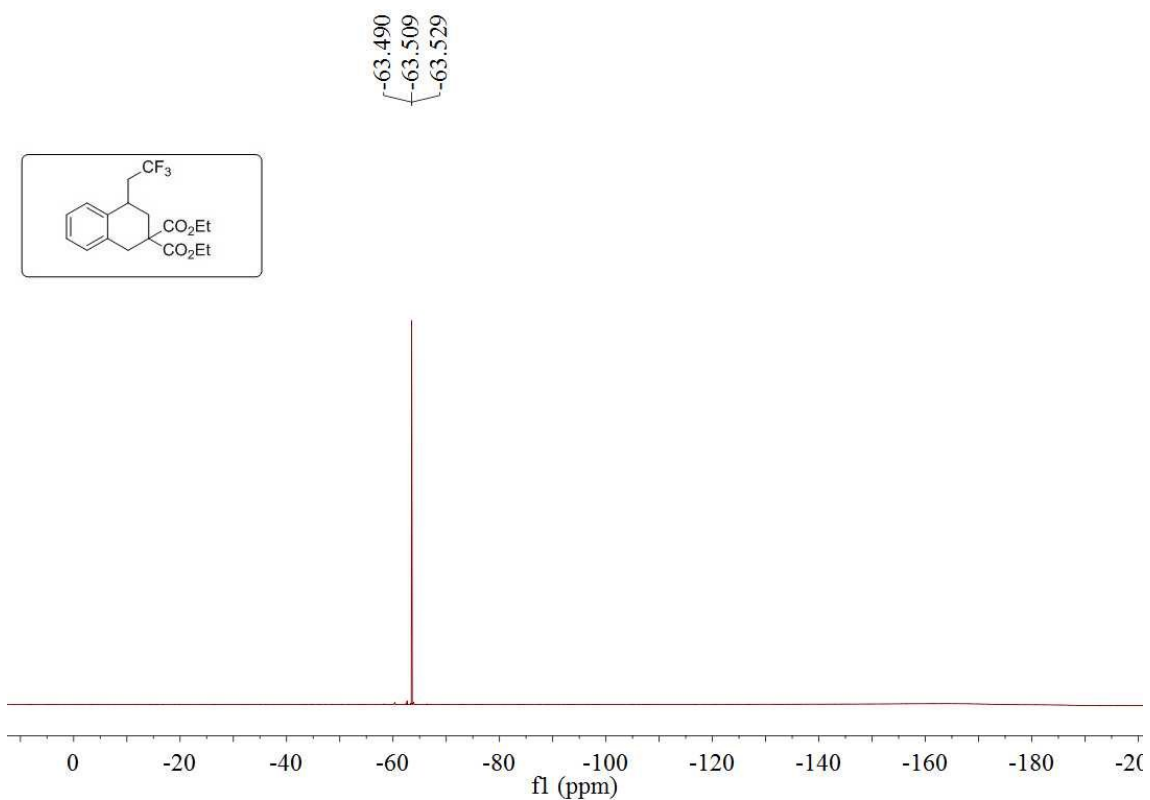

<sup>1</sup>H-NMR Spectra of 2c

# SUPPORTING INFORMATION

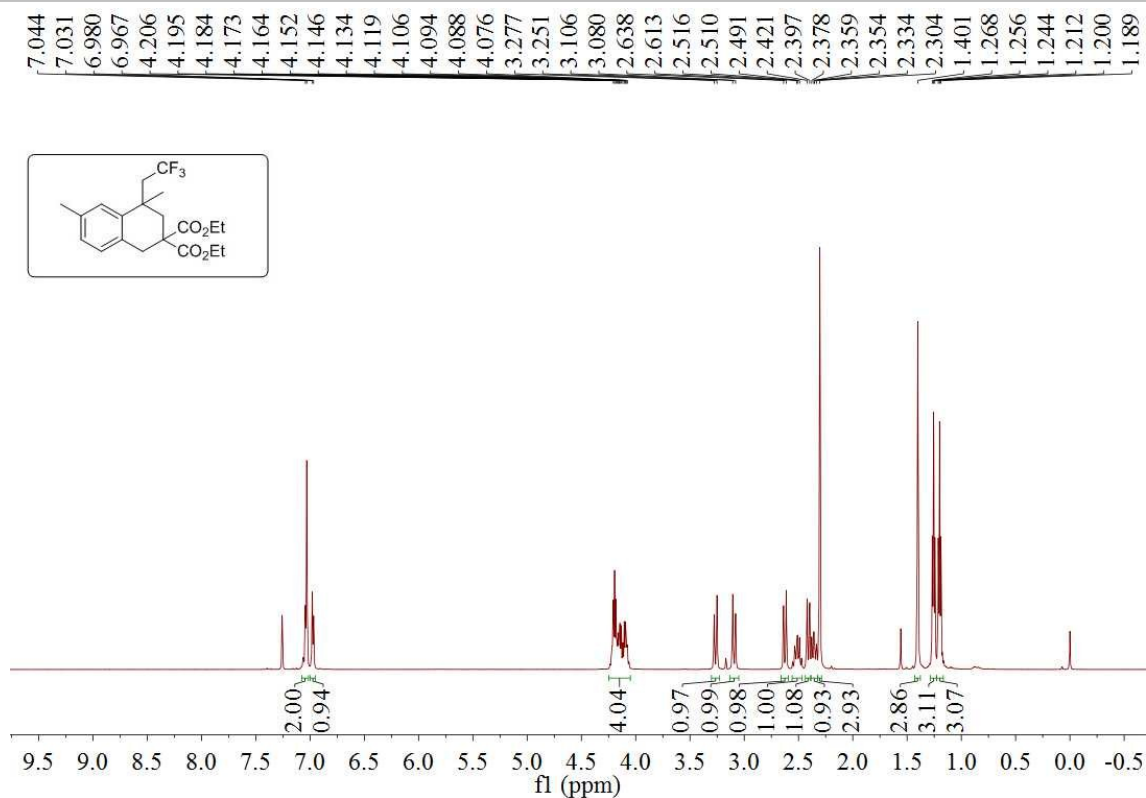

## <sup>13</sup>C-NMR Spectra of 2c

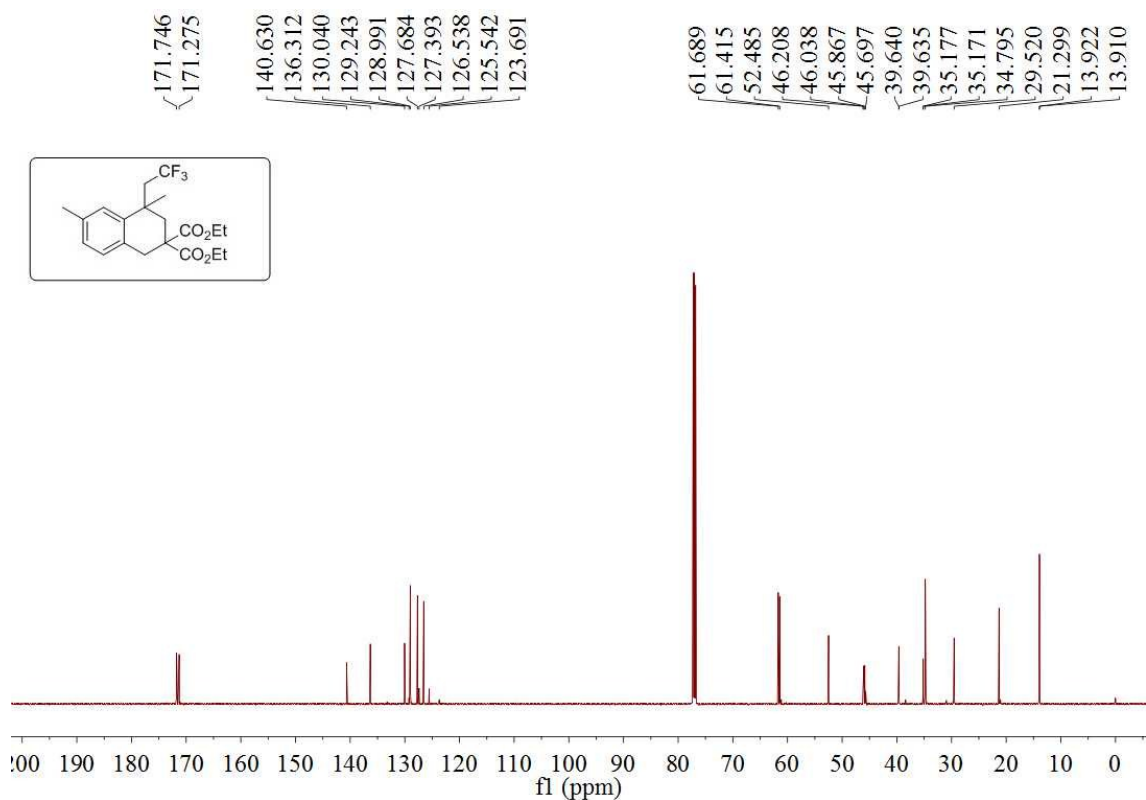

## <sup>19</sup>F-NMR Spectra of 2c

# SUPPORTING INFORMATION

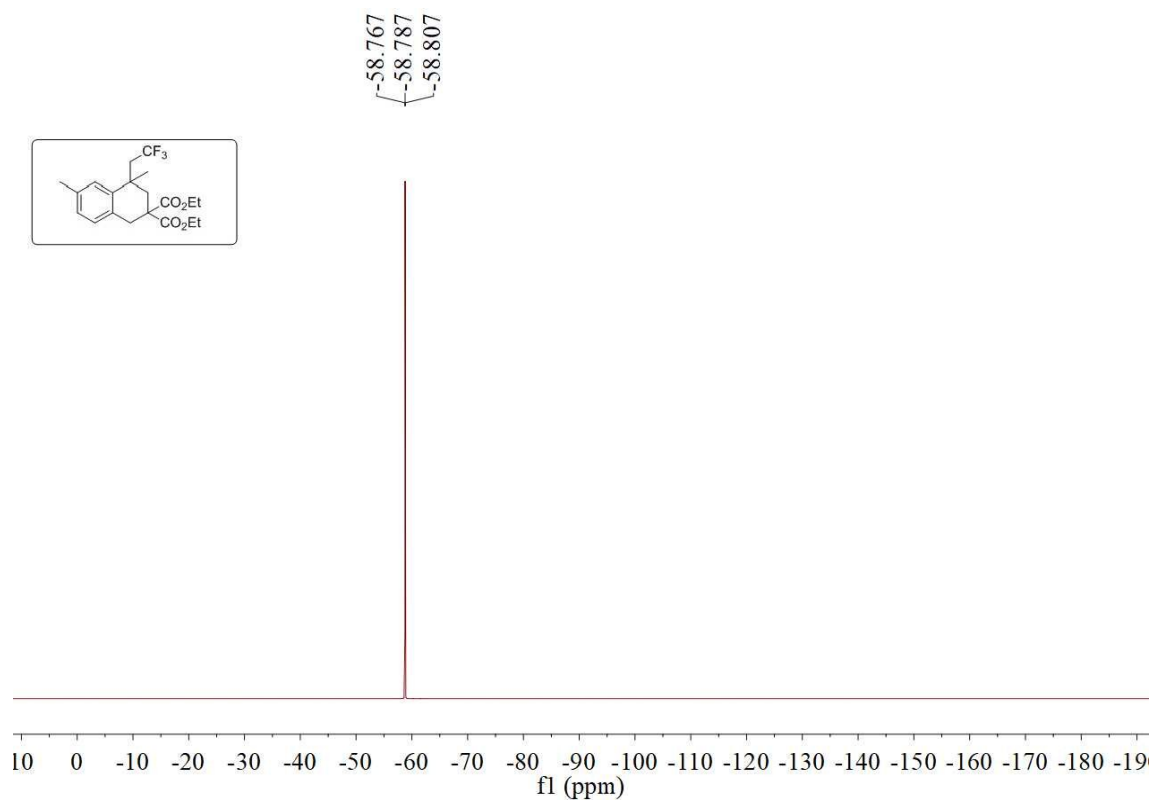

## $^1\text{H-NMR}$ Spectra of 2d

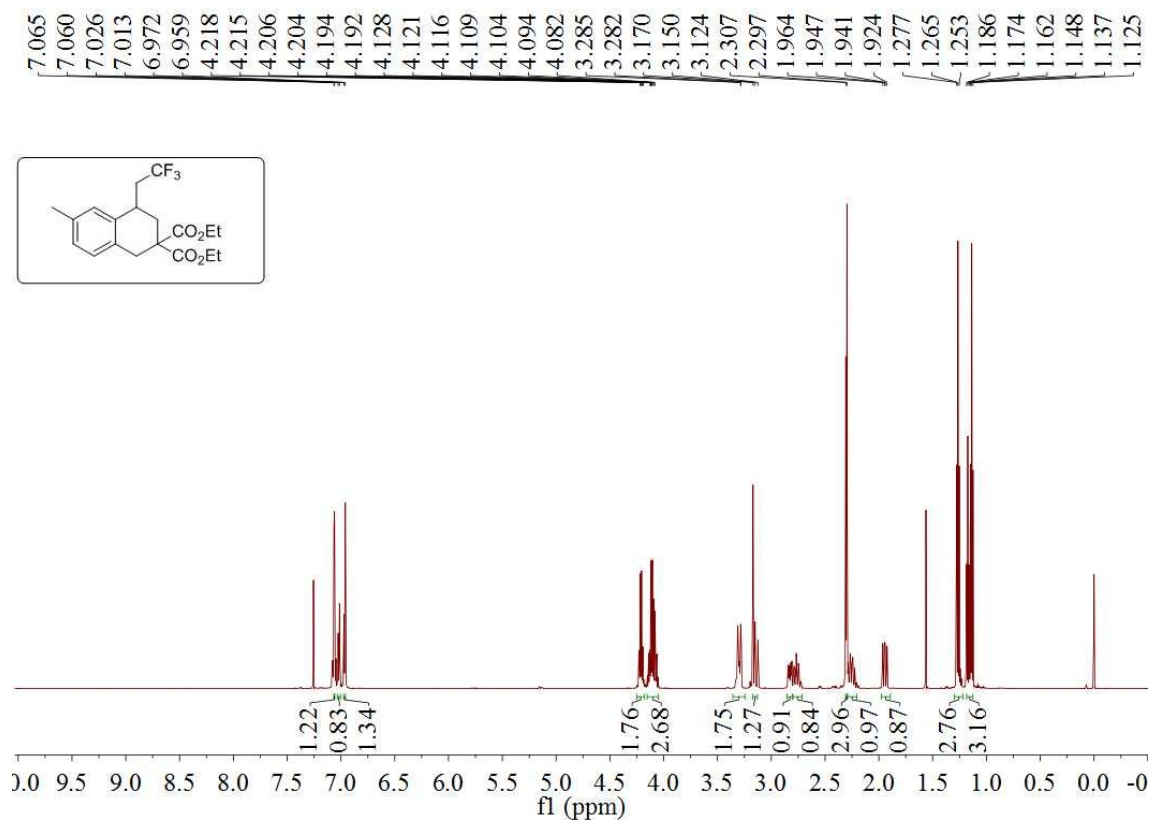

## $^{13}\text{C-NMR}$ Spectra of 2d

# SUPPORTING INFORMATION

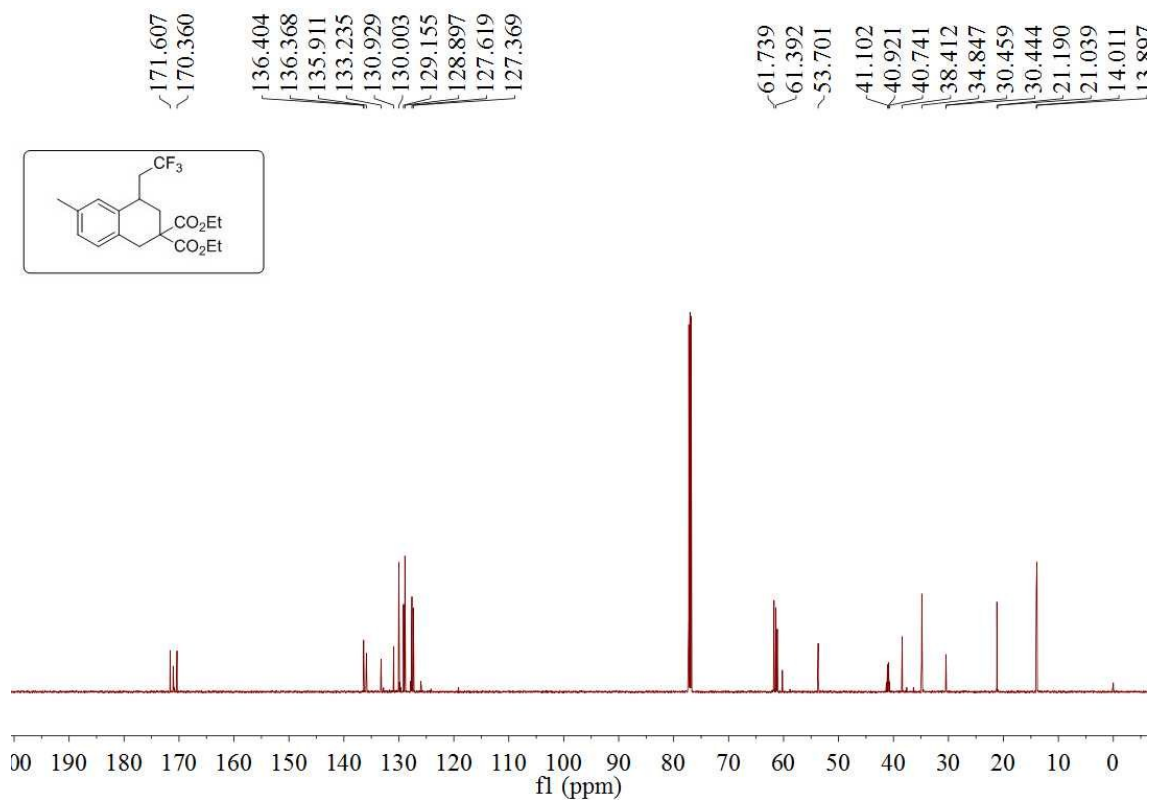

<sup>19</sup>F-NMR Spectra of 2d

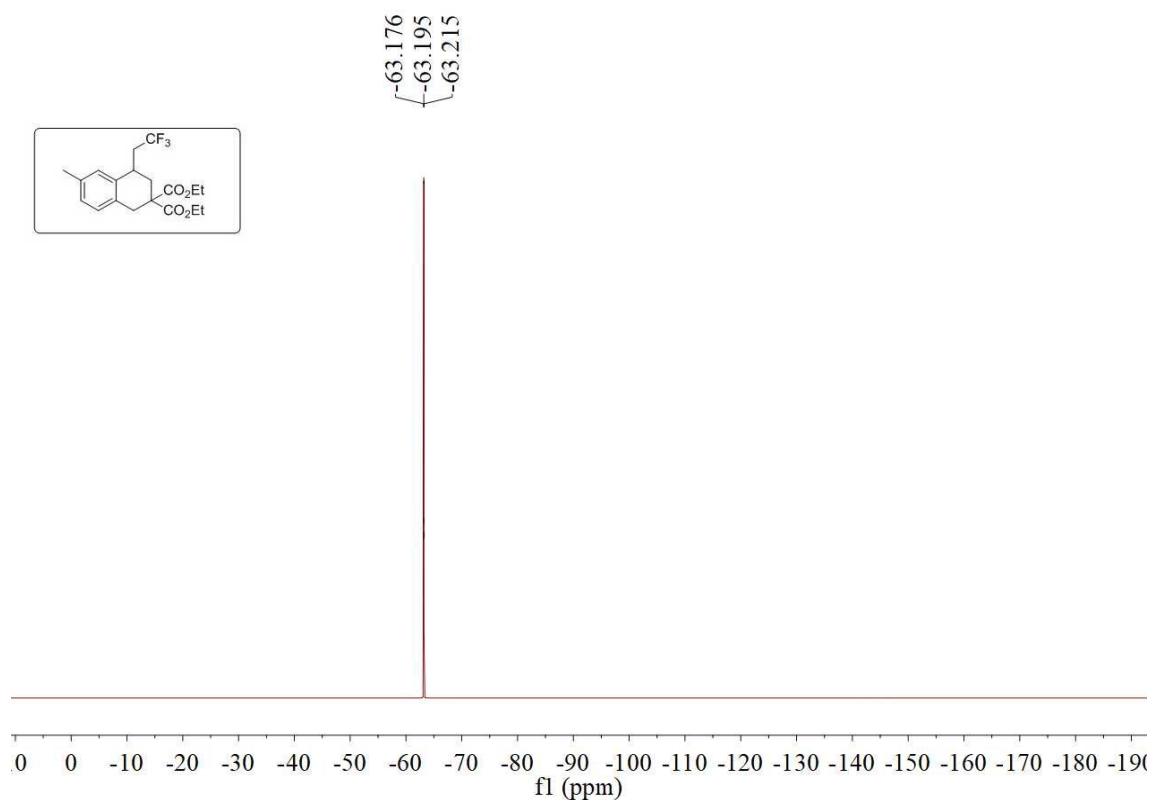

<sup>1</sup>H-NMR Spectra of 2e

# SUPPORTING INFORMATION

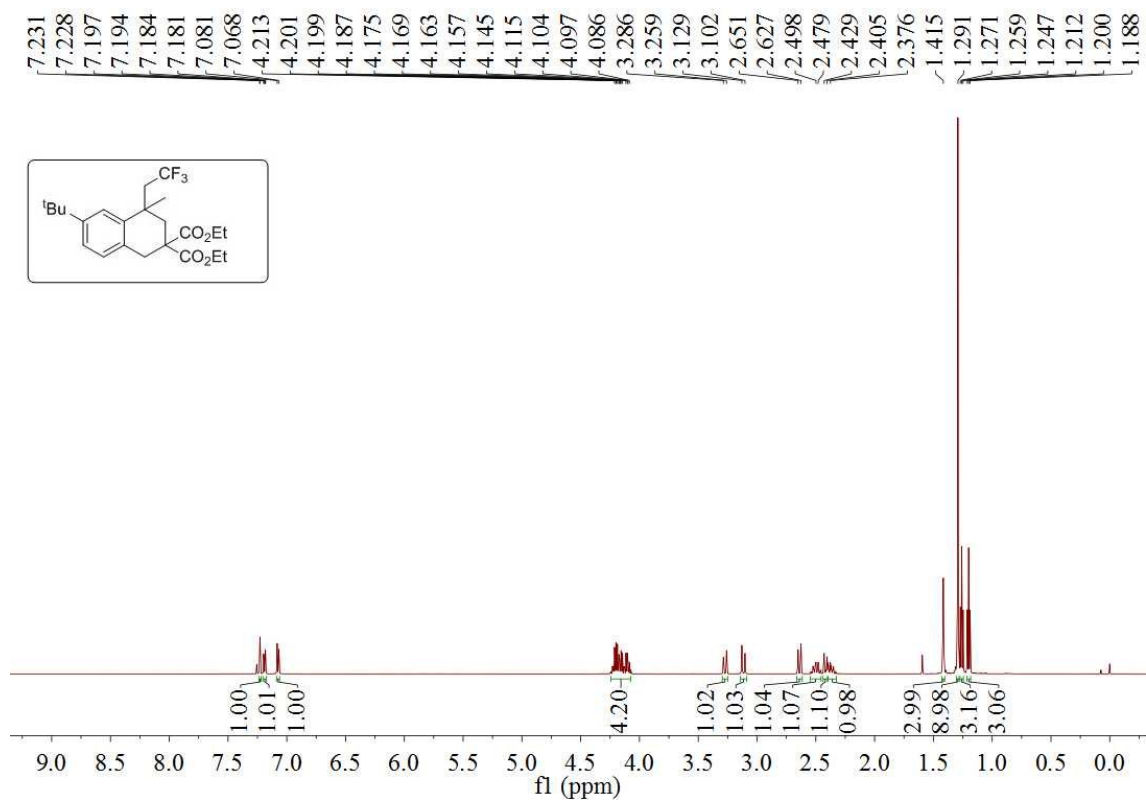

<sup>13</sup>C-NMR Spectra of 2e

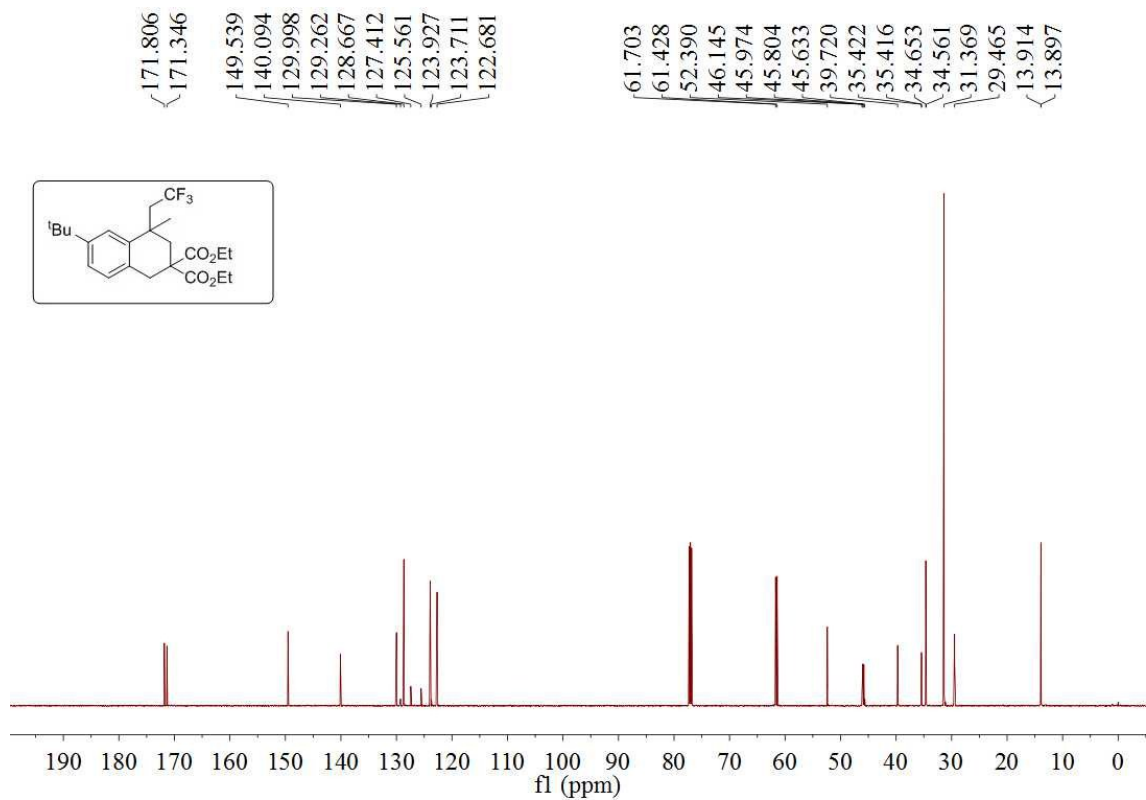

<sup>19</sup>F-NMR Spectra of 2e



# SUPPORTING INFORMATION

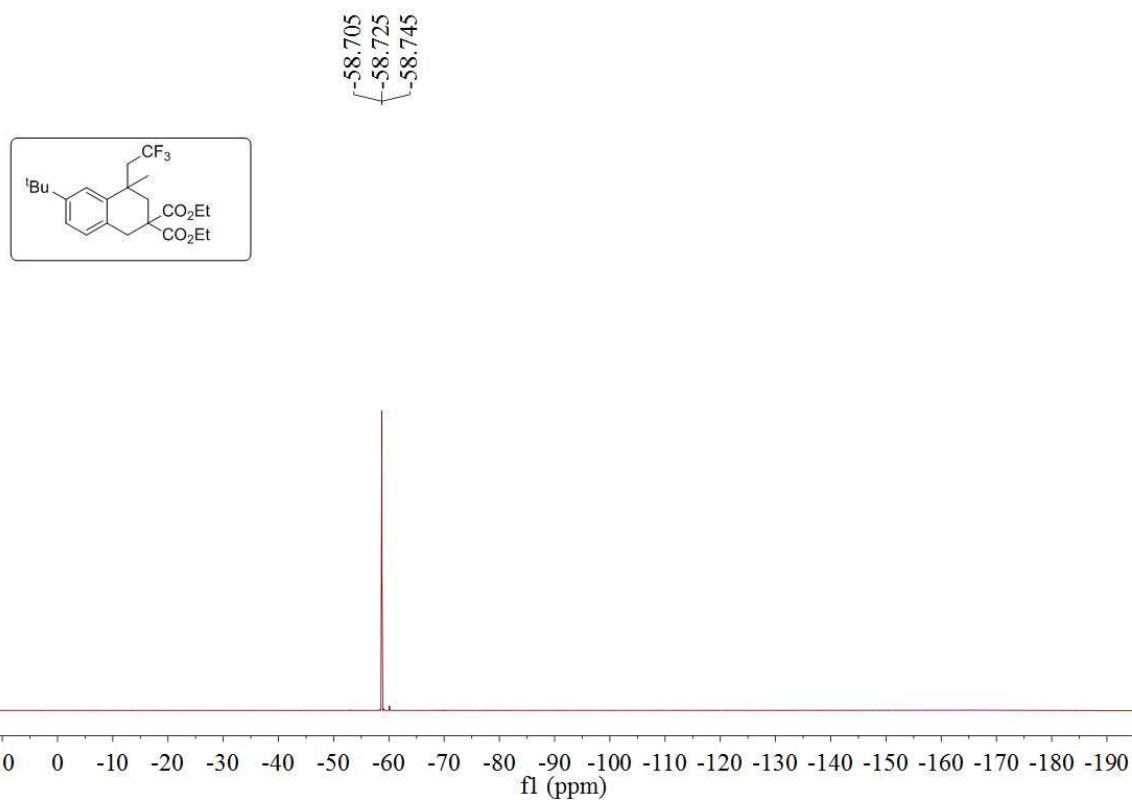

**<sup>1</sup>H-NMR Spectra of 2f**

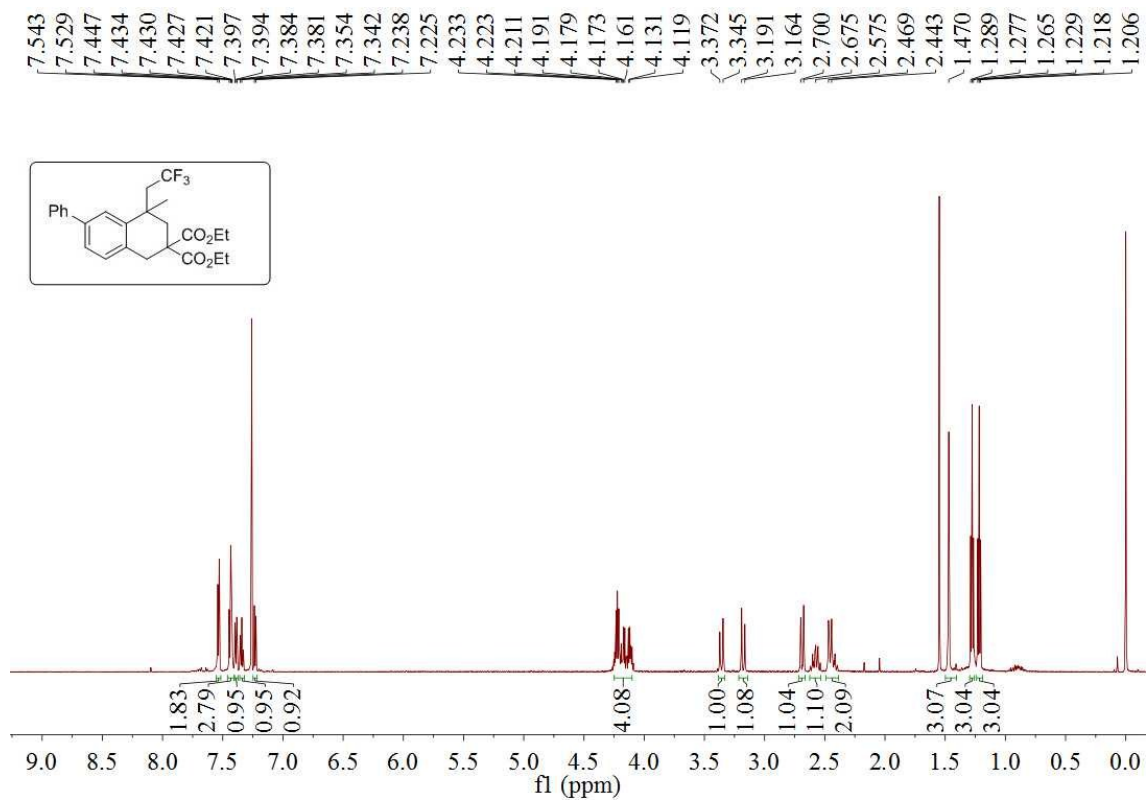

**<sup>13</sup>C-NMR Spectra of 2f**

# SUPPORTING INFORMATION

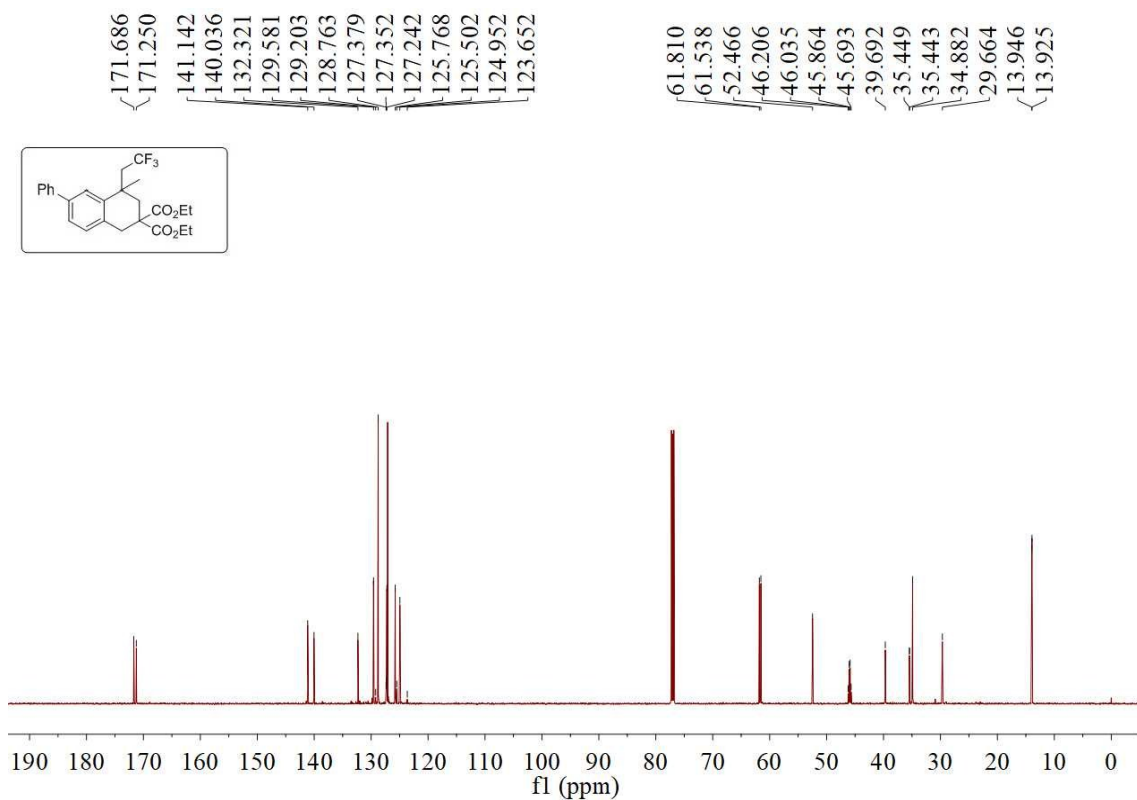

**<sup>19</sup>F-NMR Spectra of 2f**

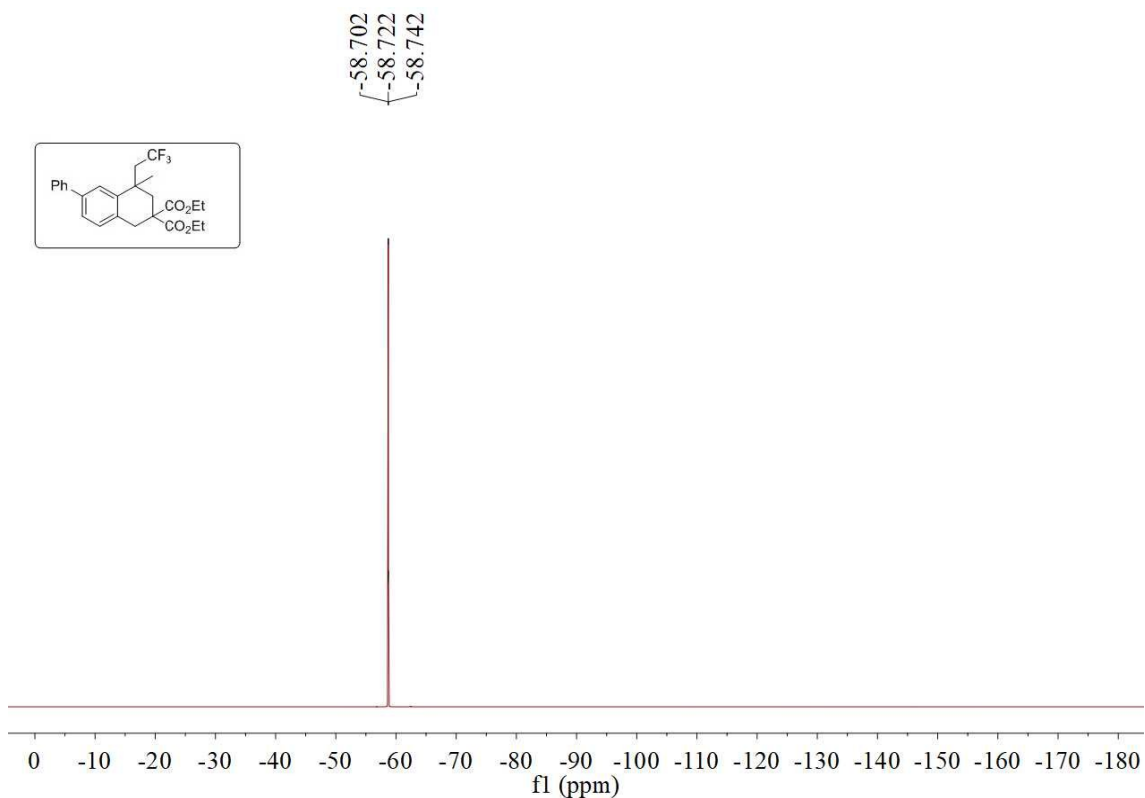

**<sup>1</sup>H-NMR Spectra of 2g**

# SUPPORTING INFORMATION

7.468  
7.466  
7.455  
7.453  
7.289  
7.276  
7.263  
4.245  
4.233  
4.232  
4.221  
4.210  
4.174  
4.168  
4.162  
4.156  
4.144  
4.111  
4.099  
4.093  
4.081  
3.401  
3.374  
3.159  
3.132  
2.687  
2.663  
2.492  
2.474  
2.429  
2.411  
2.403  
2.386  
1.427  
1.287  
1.275  
1.263  
1.214  
1.202  
1.190

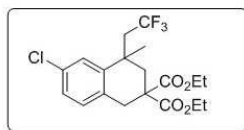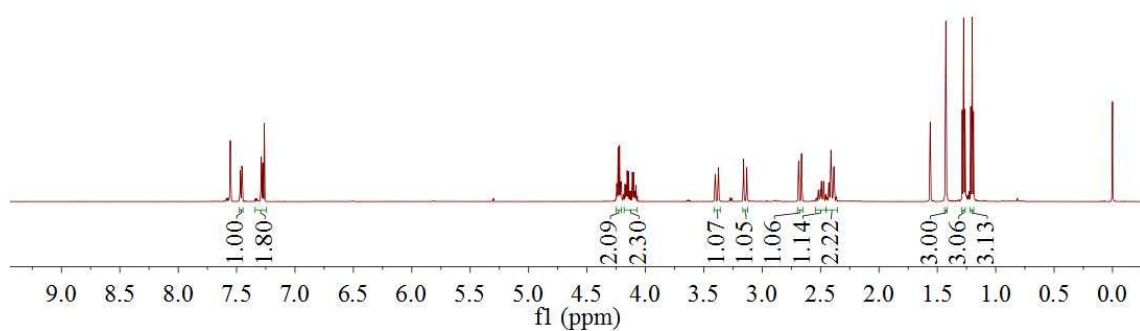

## <sup>13</sup>C-NMR Spectra of 2g

171.114  
170.772  
142.075  
139.349  
130.290  
130.143  
130.103  
128.712  
126.863  
125.014  
123.181  
110.969

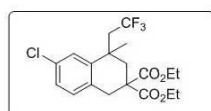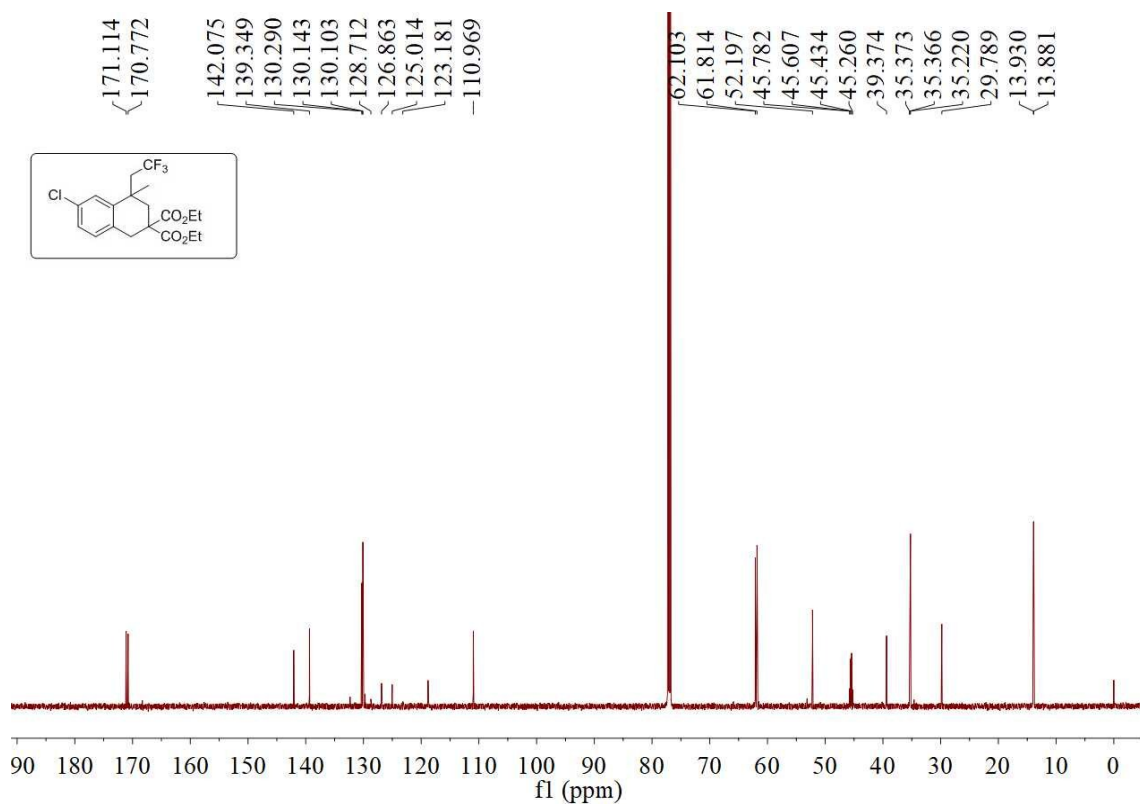

## <sup>19</sup>F-NMR Spectra of 2g

# SUPPORTING INFORMATION

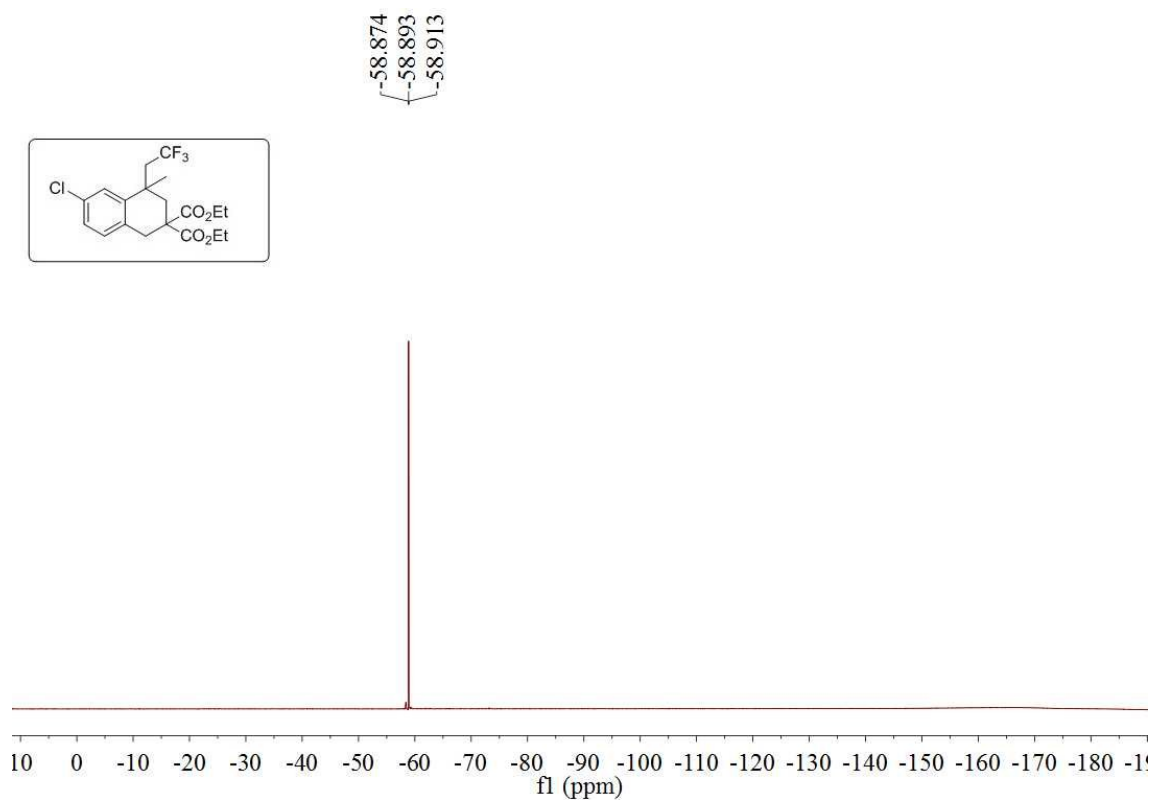

**<sup>1</sup>H-NMR Spectra of 2h**

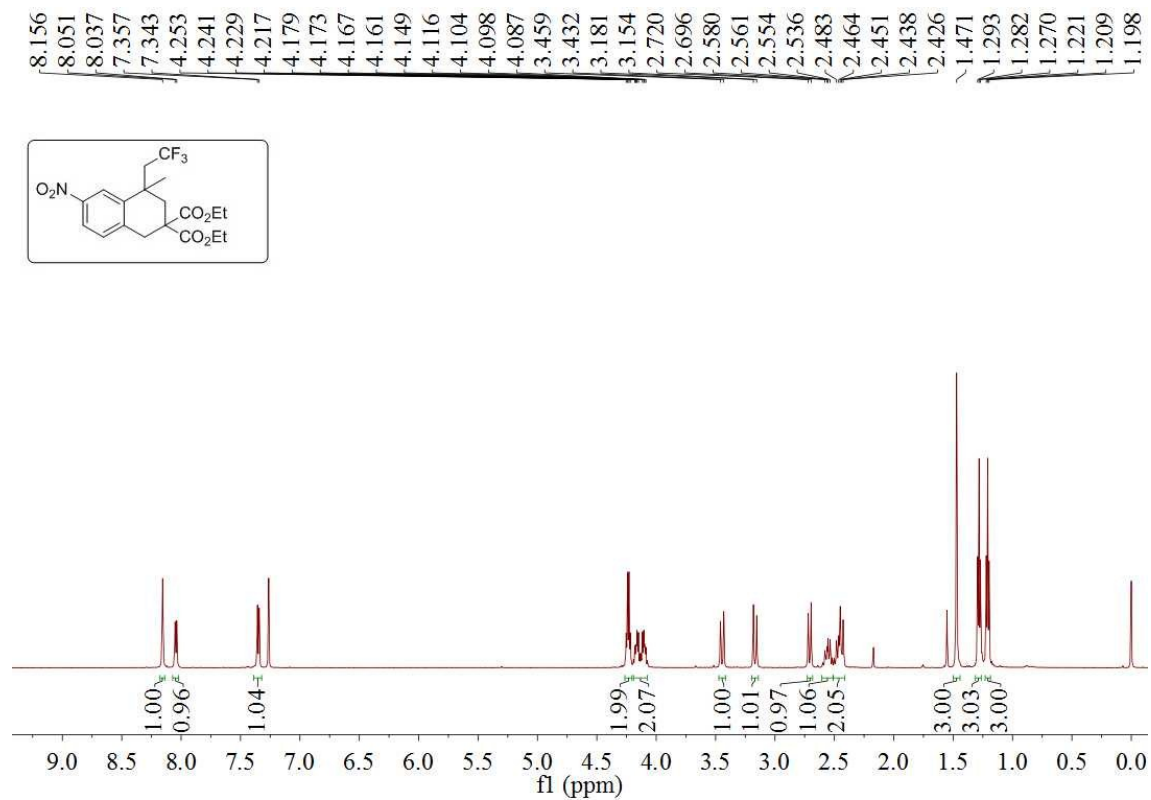

**<sup>13</sup>C-NMR Spectra of 2h**

# SUPPORTING INFORMATION

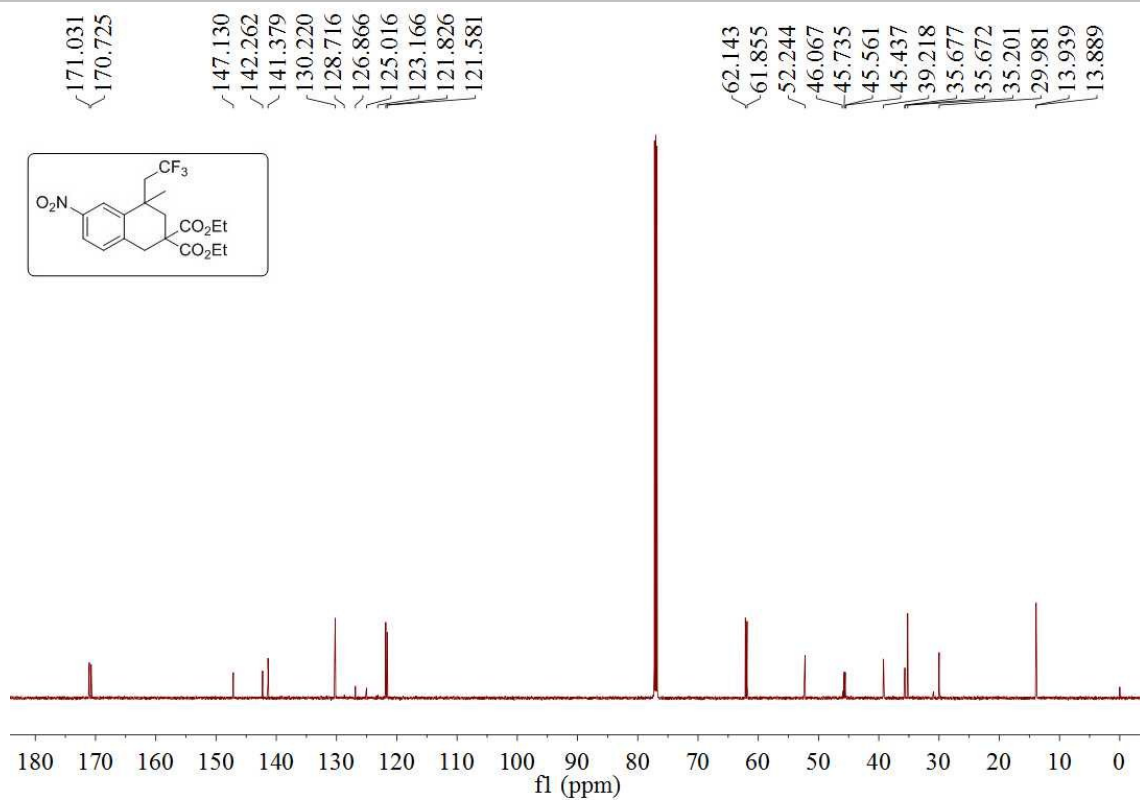

<sup>19</sup>F-NMR Spectra of 2h

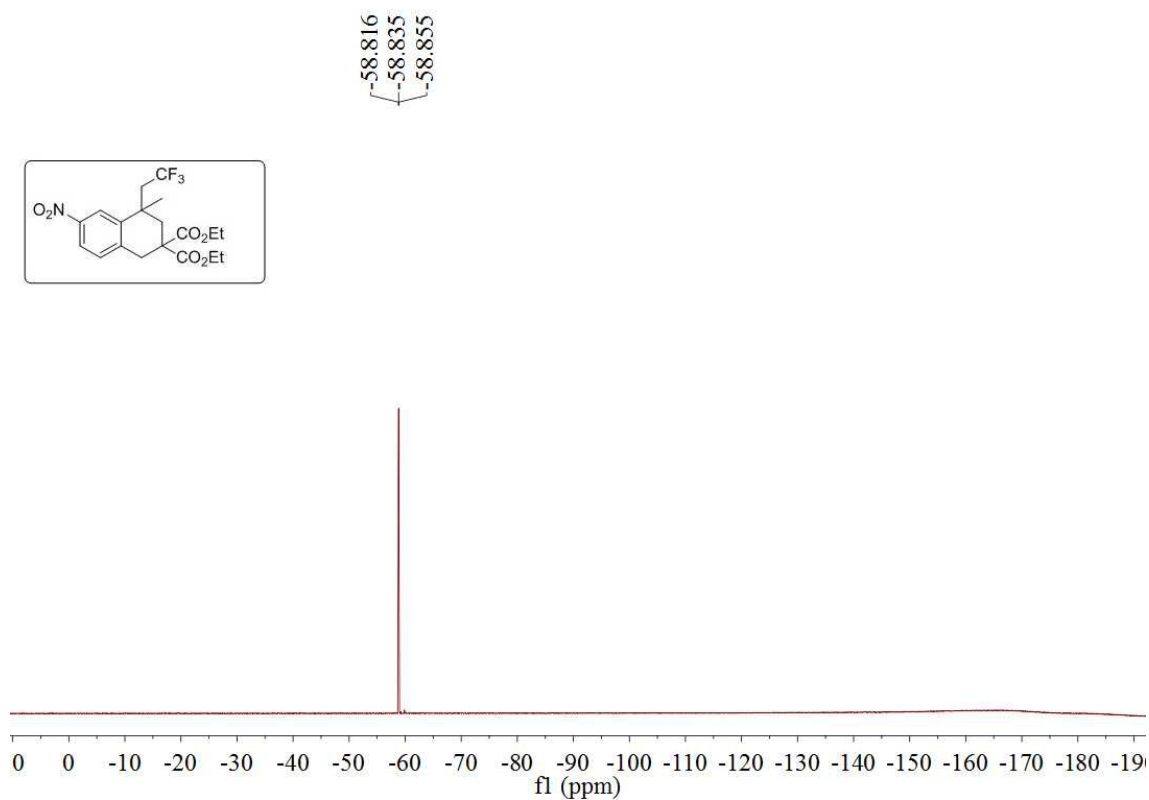

<sup>1</sup>H-NMR Spectra of 2i

# SUPPORTING INFORMATION

8.084  
8.047  
8.033  
7.342  
7.328  
4.255  
4.243  
4.231  
4.220  
4.176  
4.145  
4.132  
4.120  
4.115  
3.464  
3.436  
3.382  
3.368  
3.261  
3.233  
2.895  
2.885  
2.872  
2.862  
2.817  
2.798  
2.389  
2.381  
2.372  
2.364  
2.050  
2.032  
2.028  
2.010  
1.294  
1.282  
1.270  
1.184  
1.173  
1.161

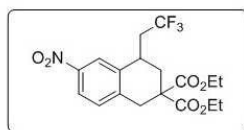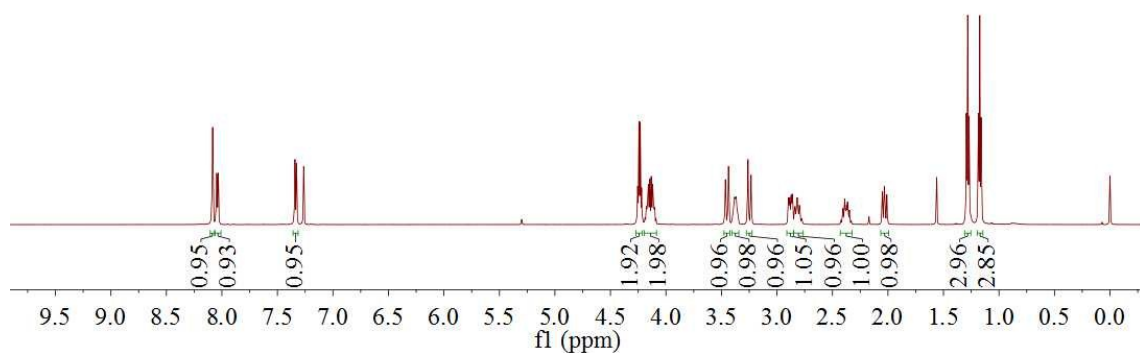

<sup>13</sup>C-NMR Spectra of 2i

170.800  
169.847  
147.003  
142.070  
137.923  
130.333  
127.356  
125.516  
123.676  
121.941  
121.866  
62.144  
61.880  
53.255  
40.408  
40.224  
40.039  
39.853  
35.219  
34.123  
30.782  
30.768  
13.991  
13.906

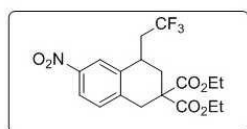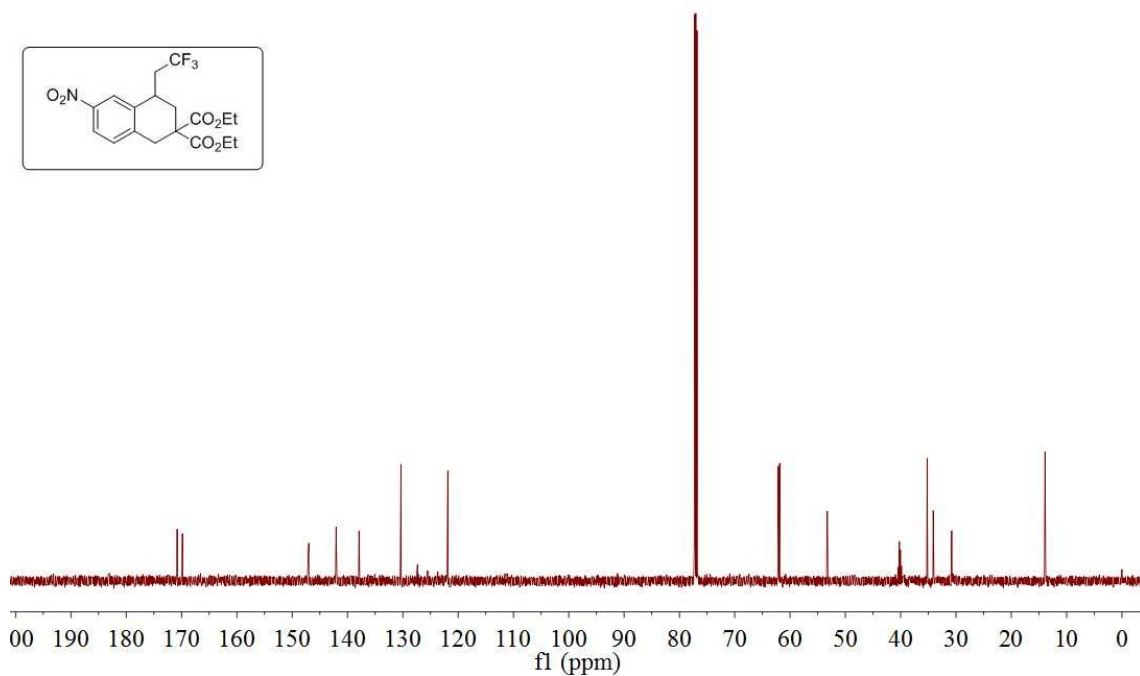

<sup>19</sup>F-NMR Spectra of 2i

# SUPPORTING INFORMATION

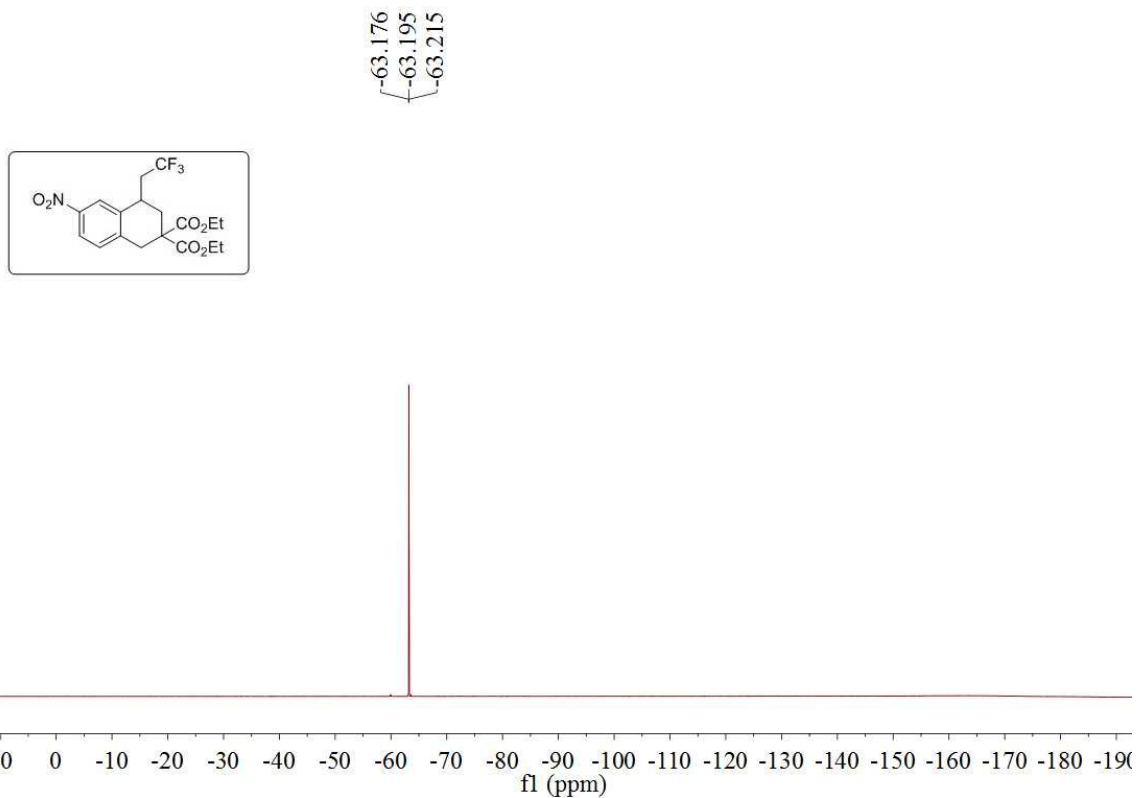

**<sup>1</sup>H-NMR Spectra of 2j**

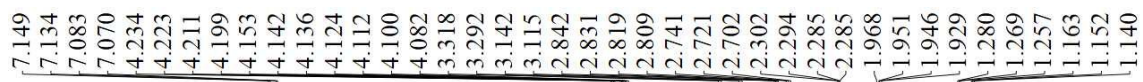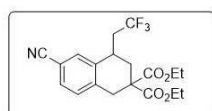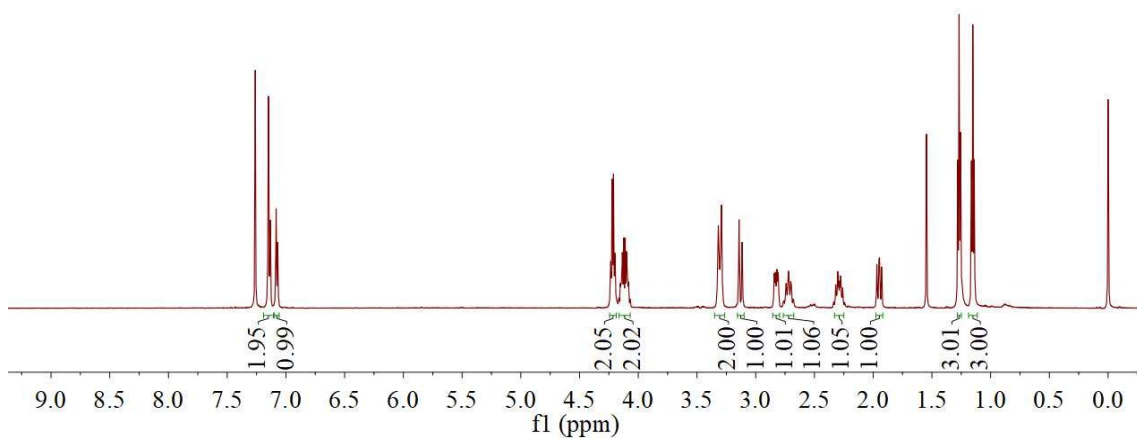

**<sup>13</sup>C-NMR Spectra of 2j**

# SUPPORTING INFORMATION

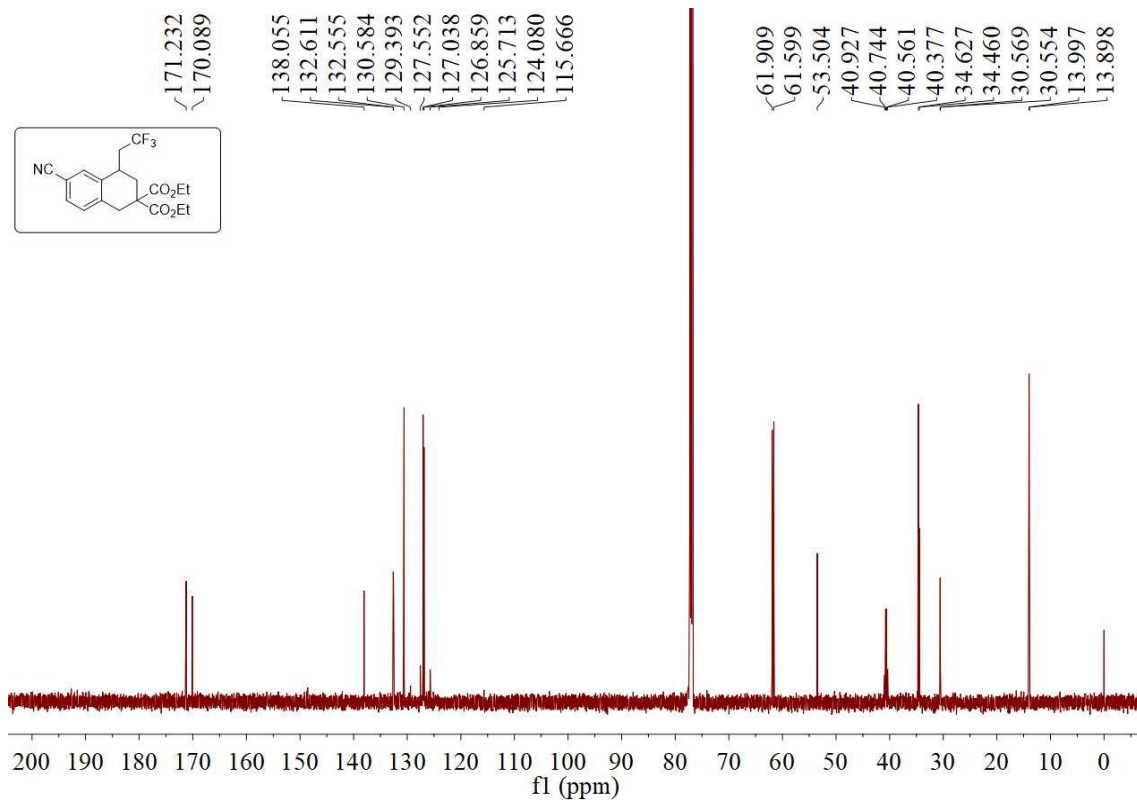

**<sup>19</sup>F-NMR Spectra of 2j**

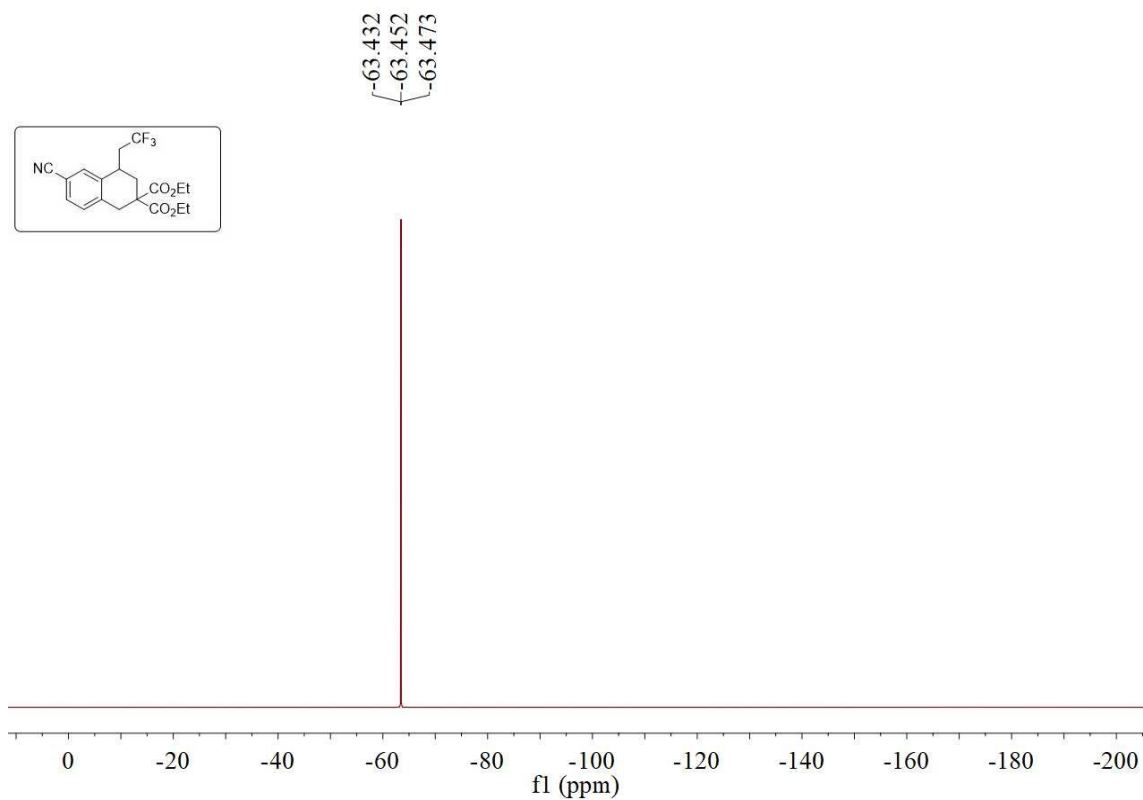

**<sup>1</sup>H-NMR Spectra of 2k**



# SUPPORTING INFORMATION

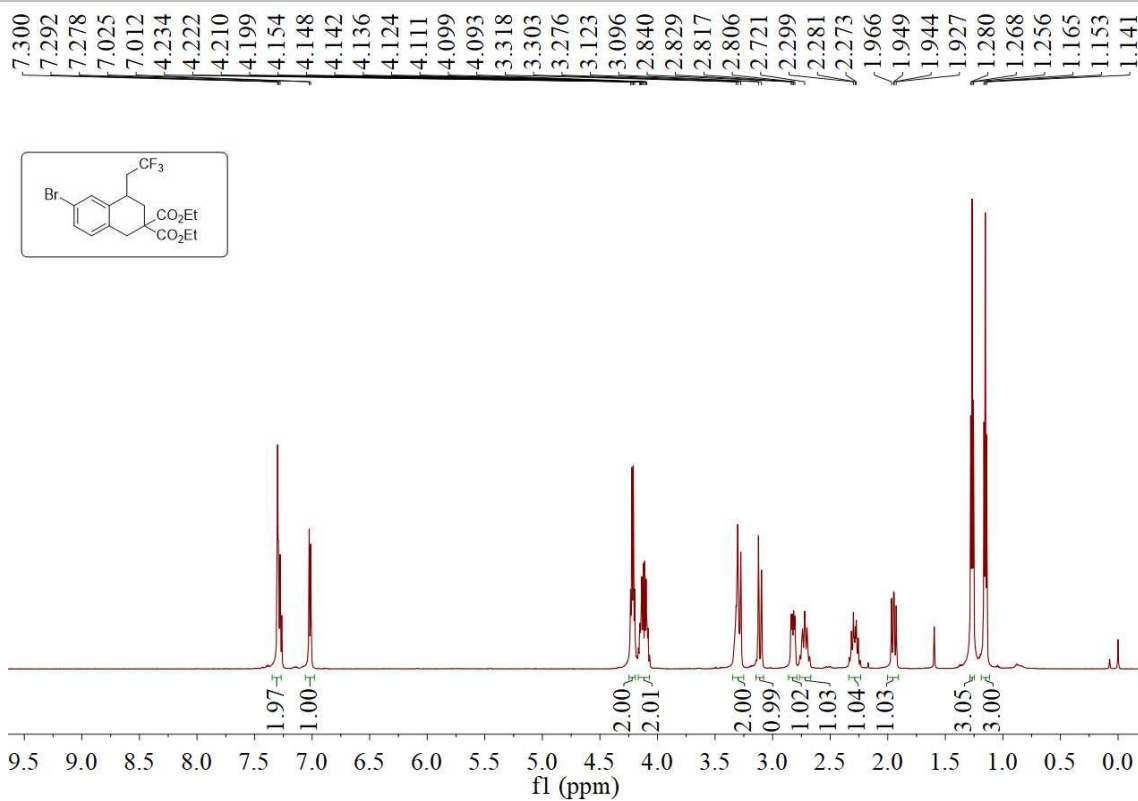

## <sup>13</sup>C-NMR Spectra of 2k

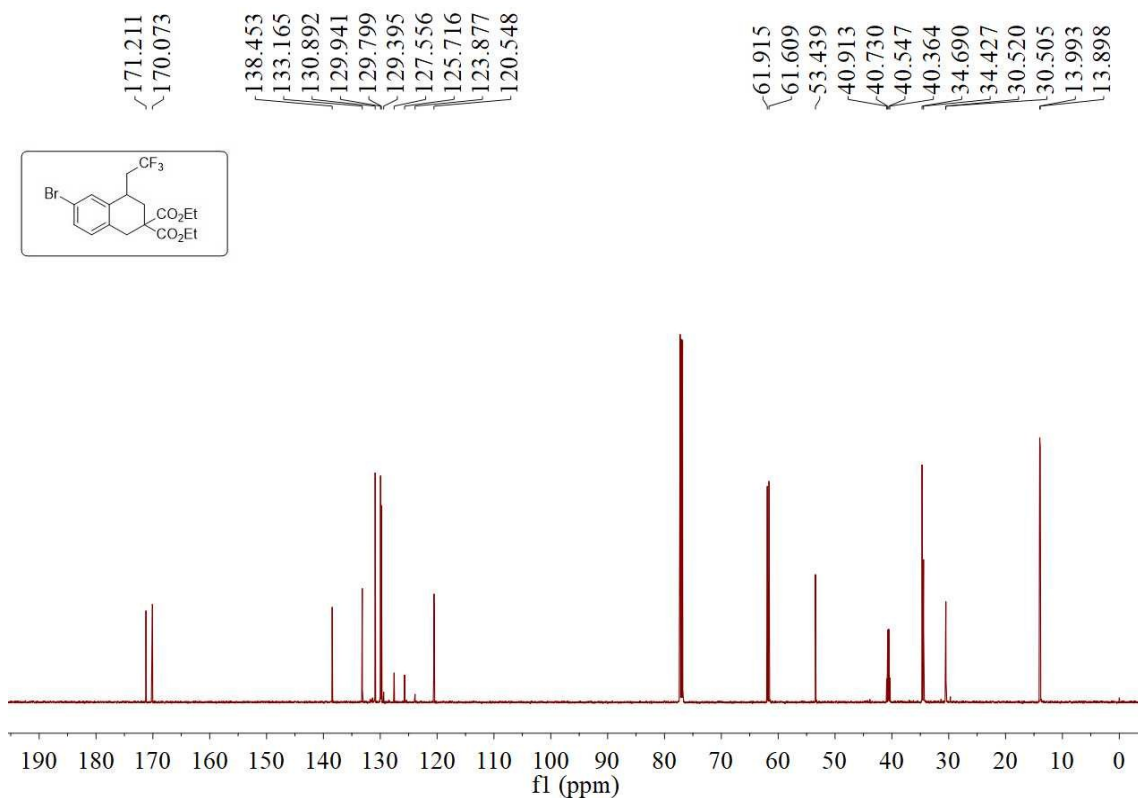

## <sup>19</sup>F-NMR Spectra of 2k

# SUPPORTING INFORMATION

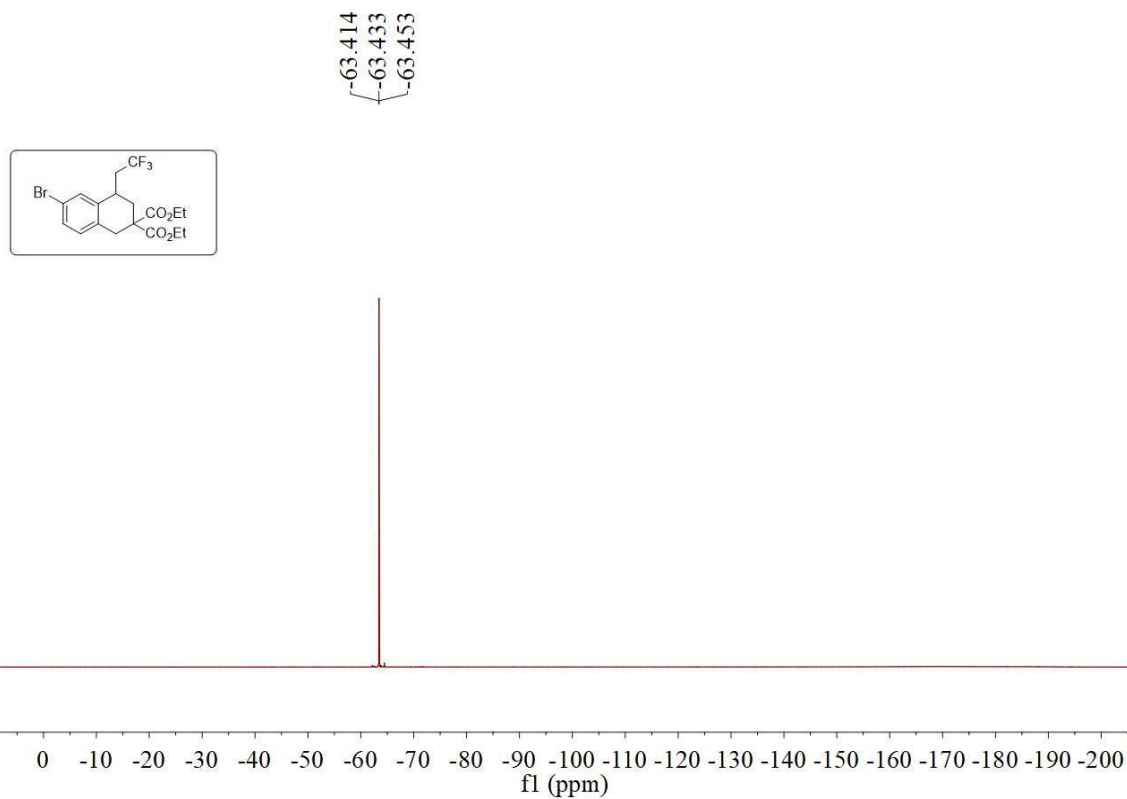

## <sup>1</sup>H-NMR Spectra of 2l

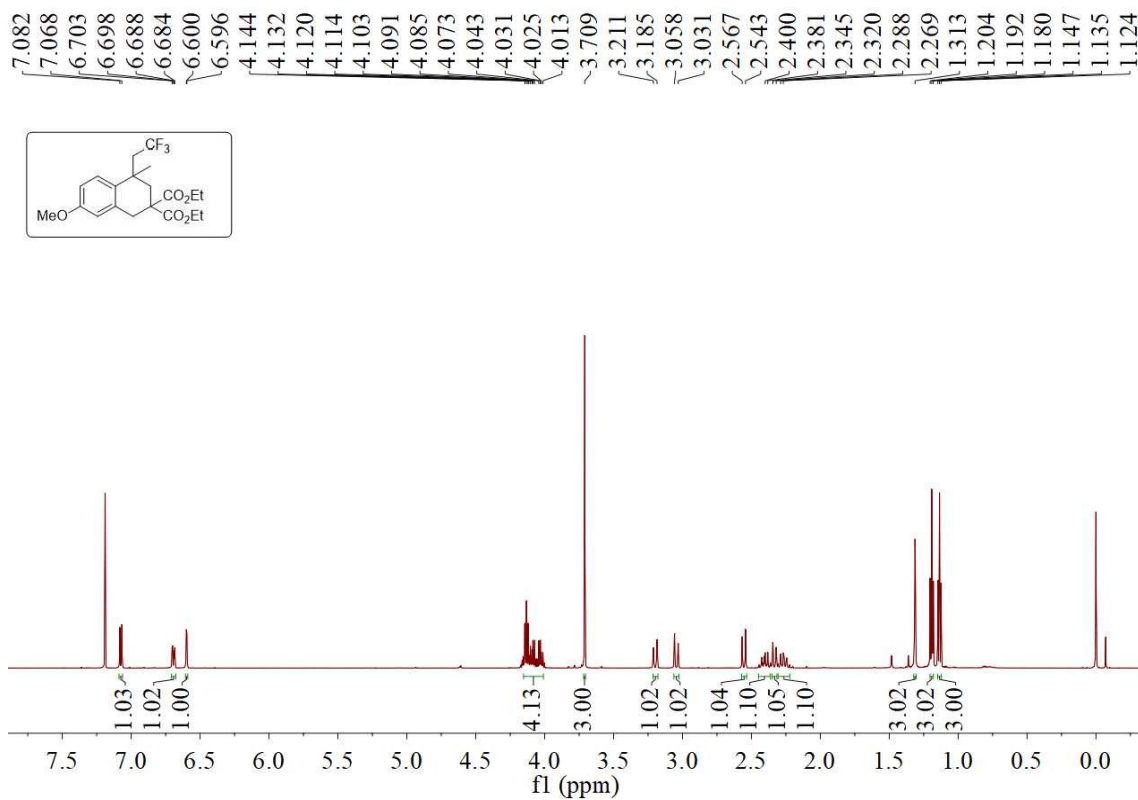

## <sup>13</sup>C-NMR Spectra of 2l

# SUPPORTING INFORMATION

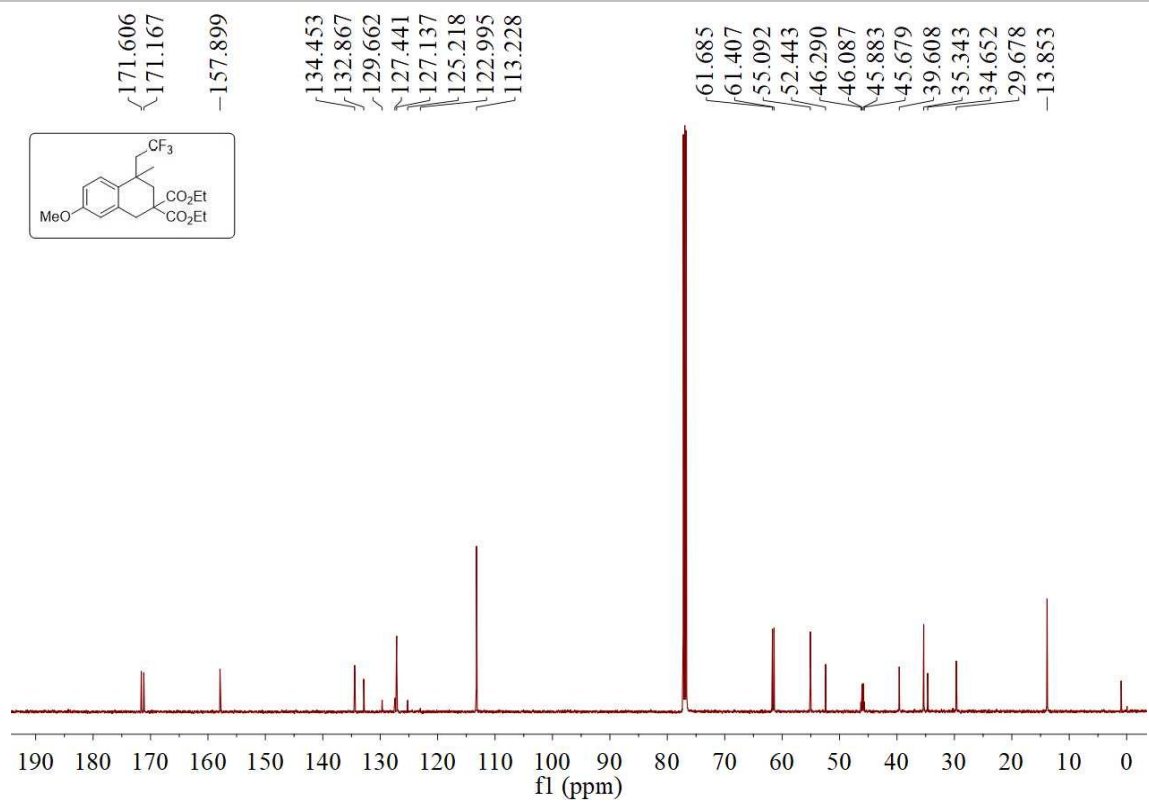

**<sup>19</sup>F-NMR Spectra of 2l**

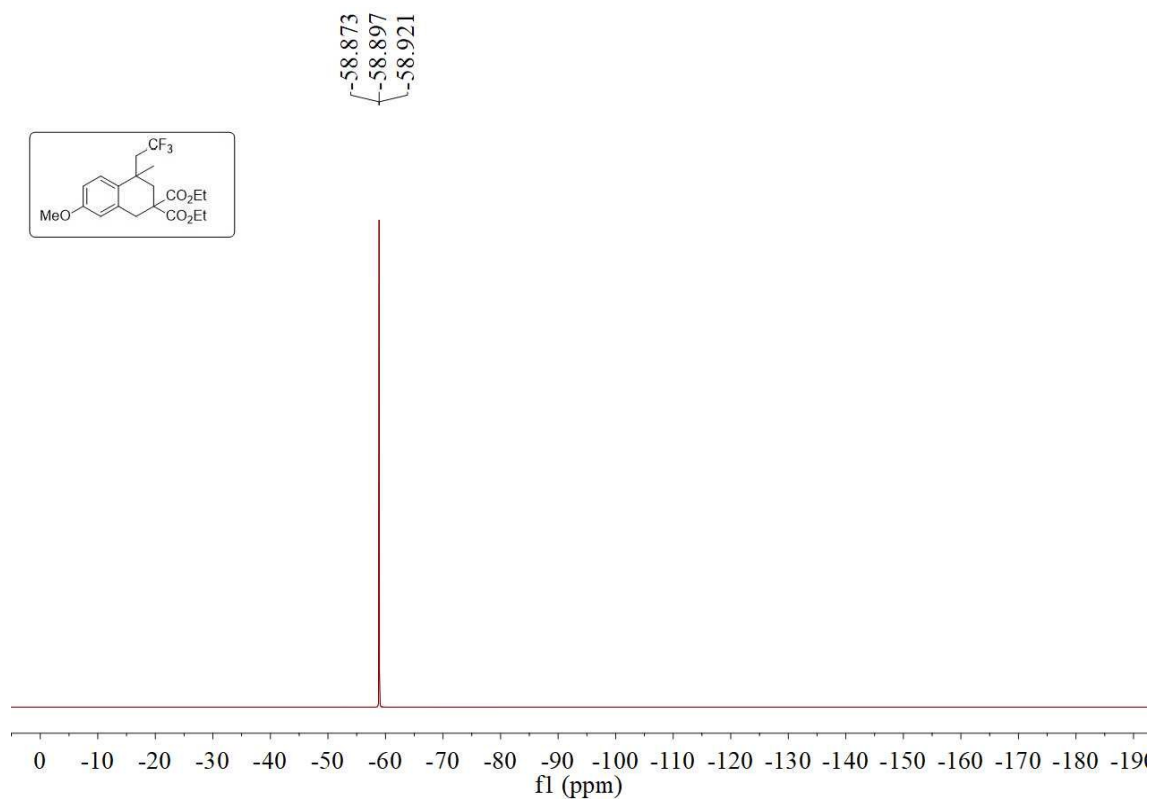

**<sup>1</sup>H-NMR Spectra of 2l**

# SUPPORTING INFORMATION

7.157  
7.144  
7.131  
6.800  
6.787  
6.731  
6.717  
4.215  
4.211  
4.203  
4.199  
4.191  
4.162  
4.150  
4.088  
4.077  
3.803  
3.340  
3.336  
3.314  
3.310  
3.000  
2.974  
2.781  
2.771  
2.761  
2.752  
2.730  
2.706  
2.400  
2.396  
2.376  
2.372  
1.401  
1.277  
1.266  
1.254  
1.220  
1.209  
1.197

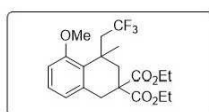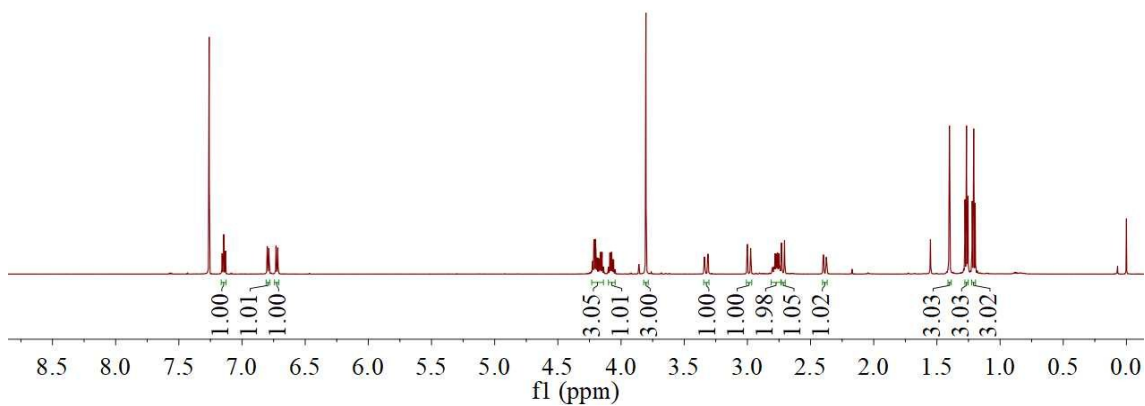

## <sup>13</sup>C-NMR Spectra of 2l

171.551  
171.157  
-158.097  
135.487  
129.712  
127.863  
127.614  
127.324  
126.013  
124.165  
121.976  
-109.562  
61.615  
61.252  
54.977  
51.830  
42.933  
42.766  
42.599  
42.432  
41.689  
41.677  
36.130  
35.233  
27.056  
13.956  
13.864

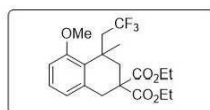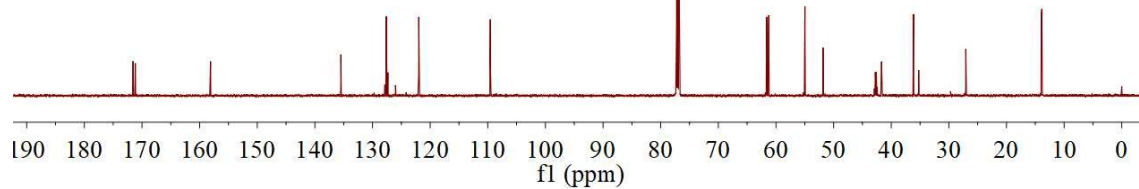

## <sup>19</sup>F-NMR Spectra of 2l

# SUPPORTING INFORMATION

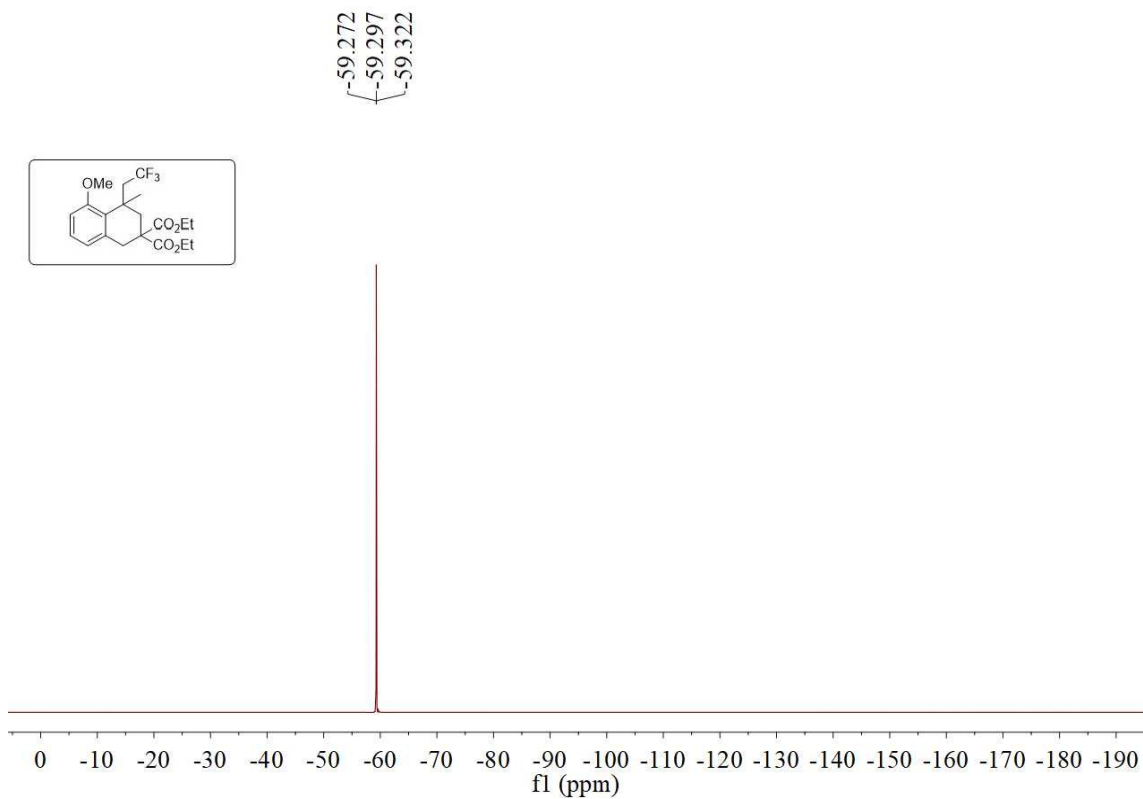

## $^1\text{H-NMR}$ Spectra of 2m

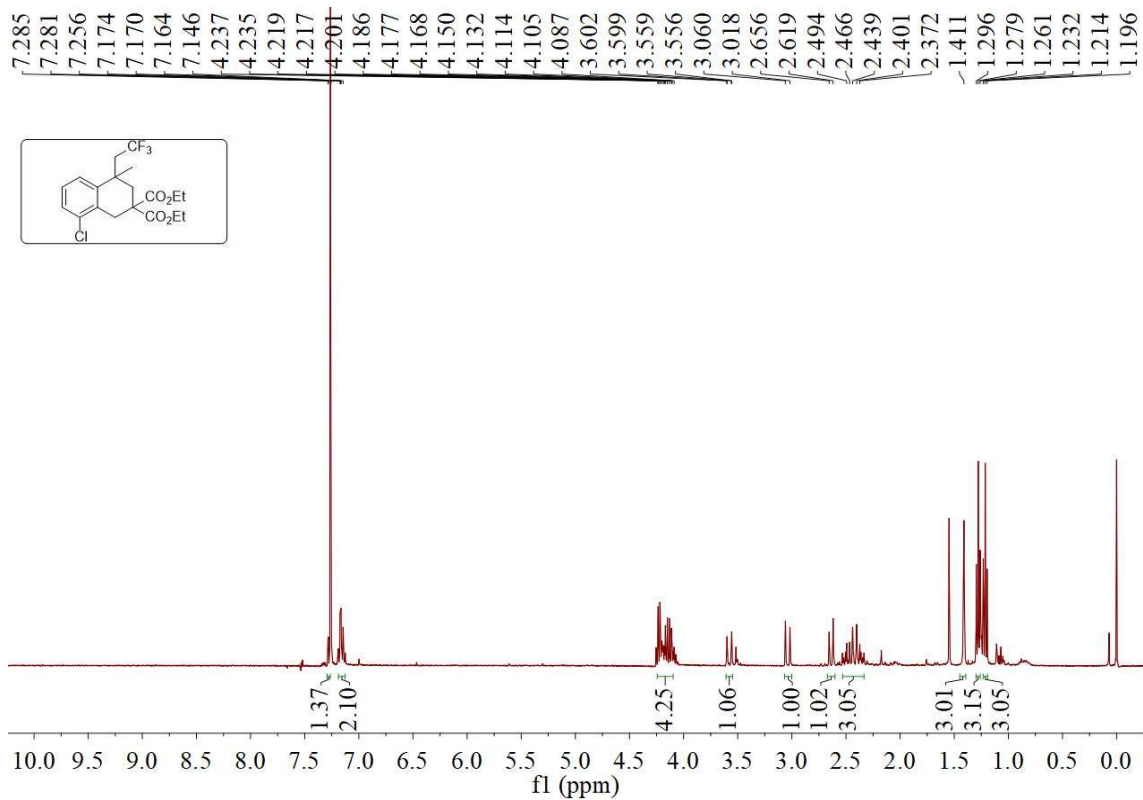

## $^{13}\text{C-NMR}$ Spectra of 2m

## SUPPORTING INFORMATION

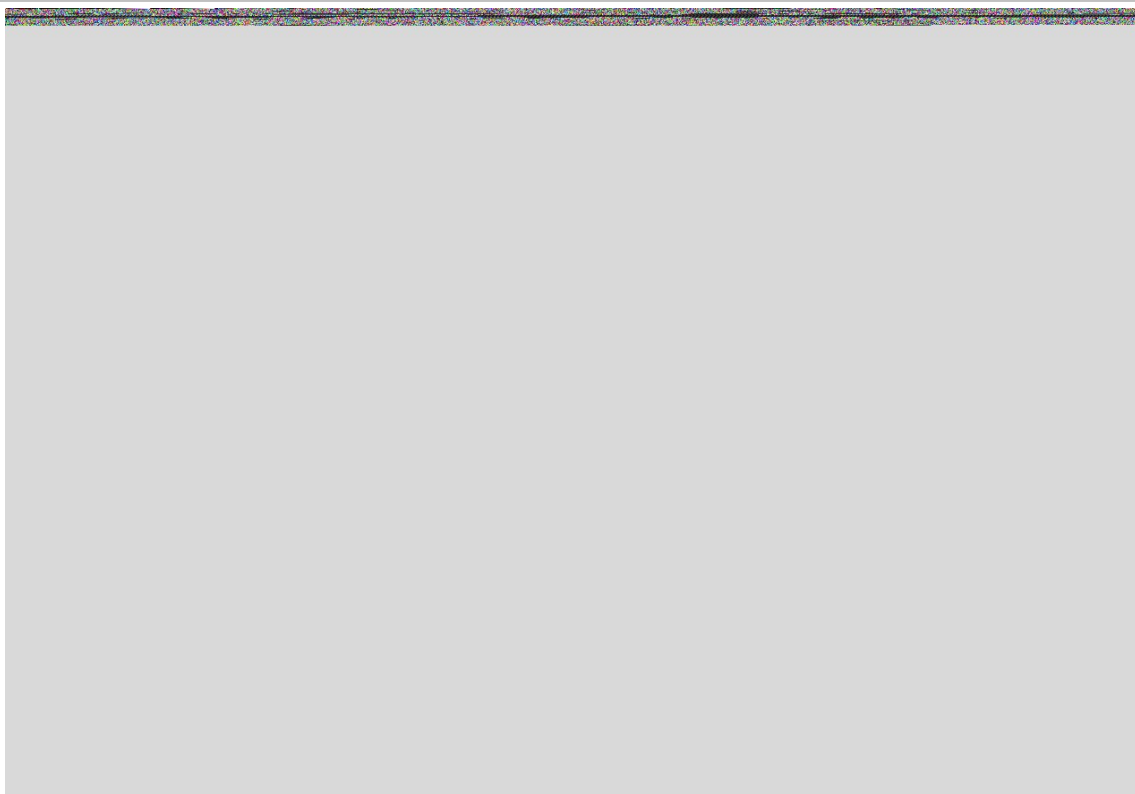

<sup>19</sup>F-NMR Spectra of 2m

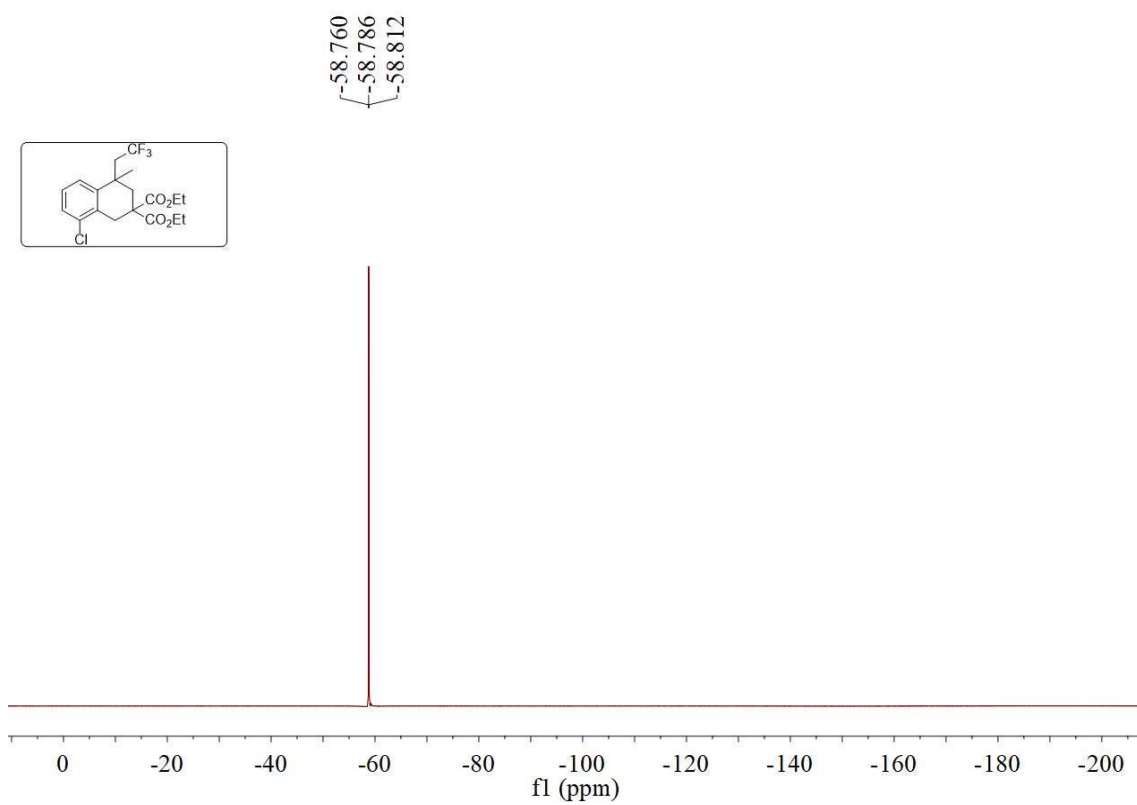

<sup>1</sup>H-NMR Spectra of 2n

# SUPPORTING INFORMATION

8.108  
8.094  
7.816  
7.802  
7.730  
7.715  
7.559  
7.547  
7.504  
7.492  
7.480  
7.382  
7.368  
4.275  
4.268  
4.263  
4.256  
4.251  
4.244  
4.171  
4.159  
4.143  
4.131  
3.854  
3.826  
3.426  
3.399  
2.803  
2.779  
2.633  
2.614  
2.581  
2.557  
1.488  
1.319  
1.307  
1.295  
1.220  
1.208  
1.196

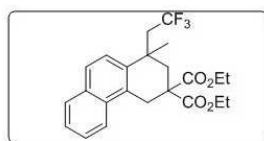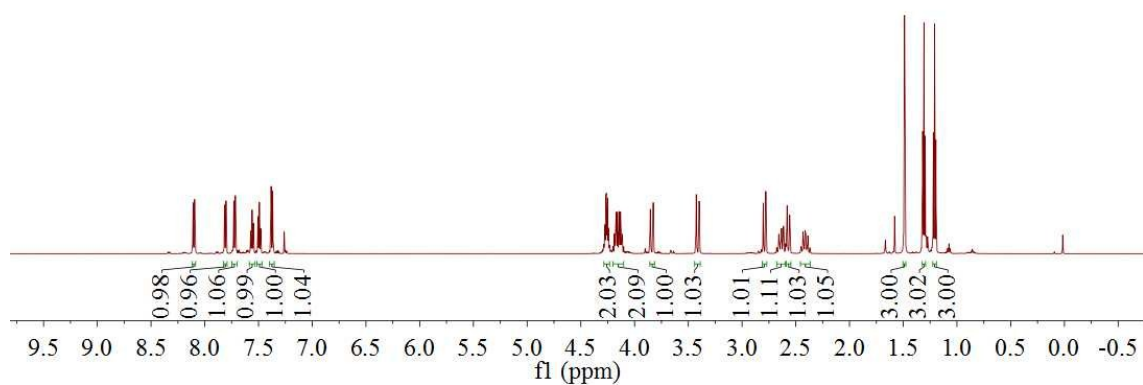

## <sup>13</sup>C-NMR Spectra of 2n

171.850  
171.351  
137.396  
132.176  
131.779  
129.144  
128.386  
128.224  
127.379  
127.279  
126.509  
125.701  
125.528  
123.826  
123.678  
123.388

61.861  
61.542  
52.080  
46.207  
46.035  
45.864  
45.692  
38.556  
35.599  
35.593  
30.840  
29.382  
13.947  
13.897

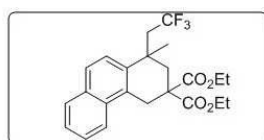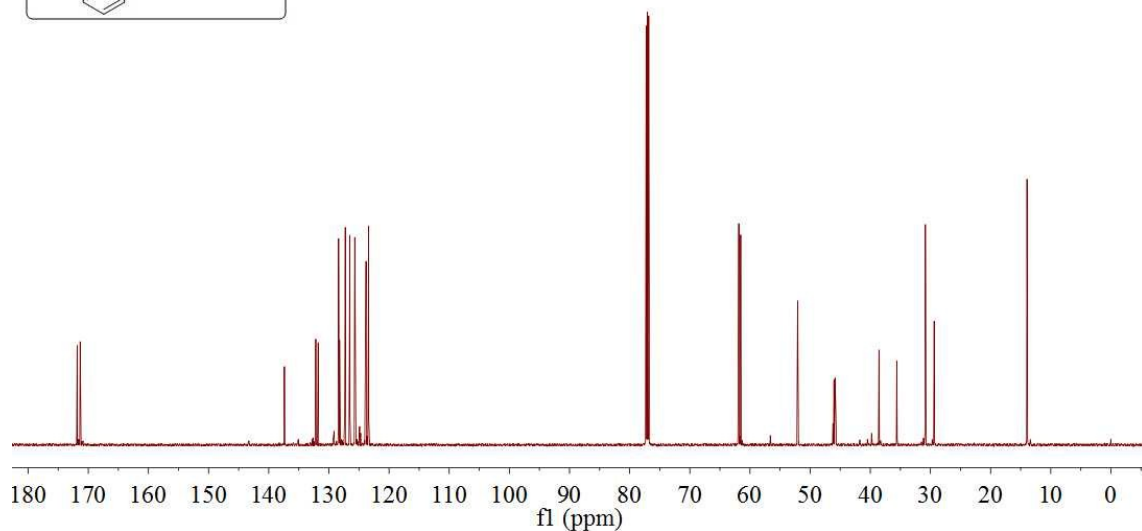

## <sup>19</sup>F-NMR Spectra of 2n

# SUPPORTING INFORMATION

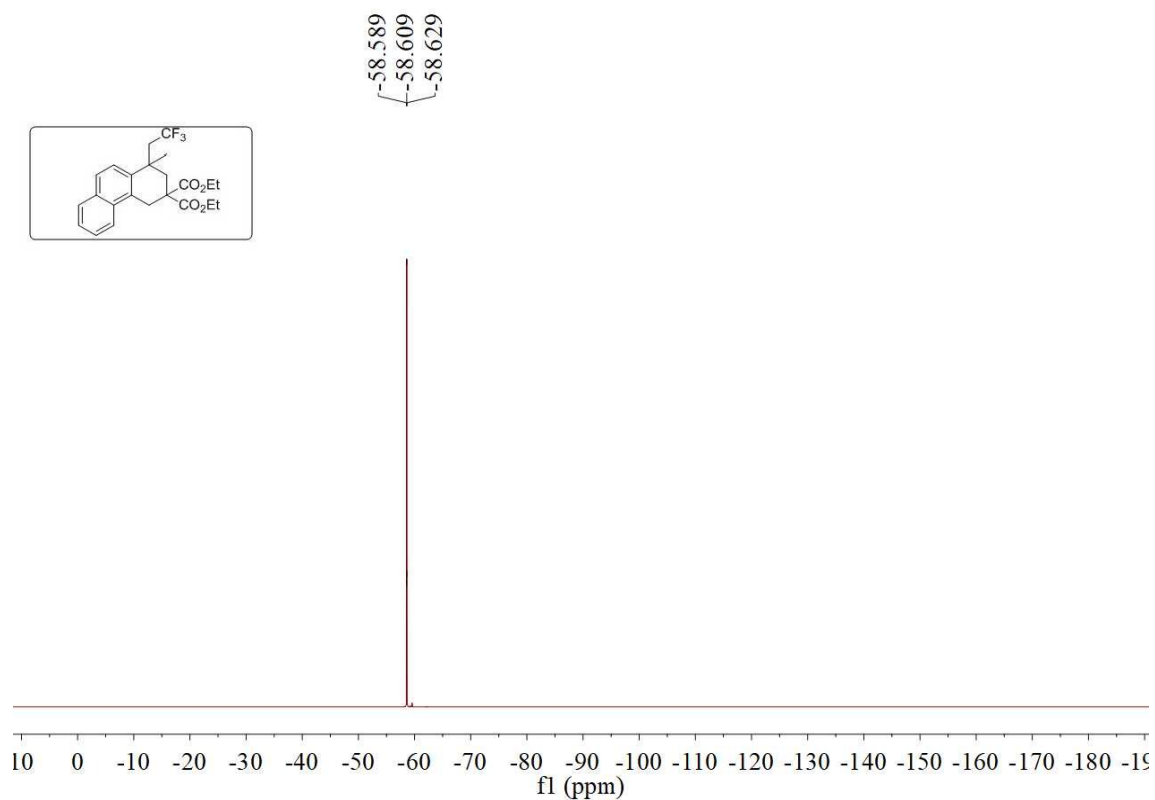

## $^1\text{H-NMR}$ Spectra of 4a

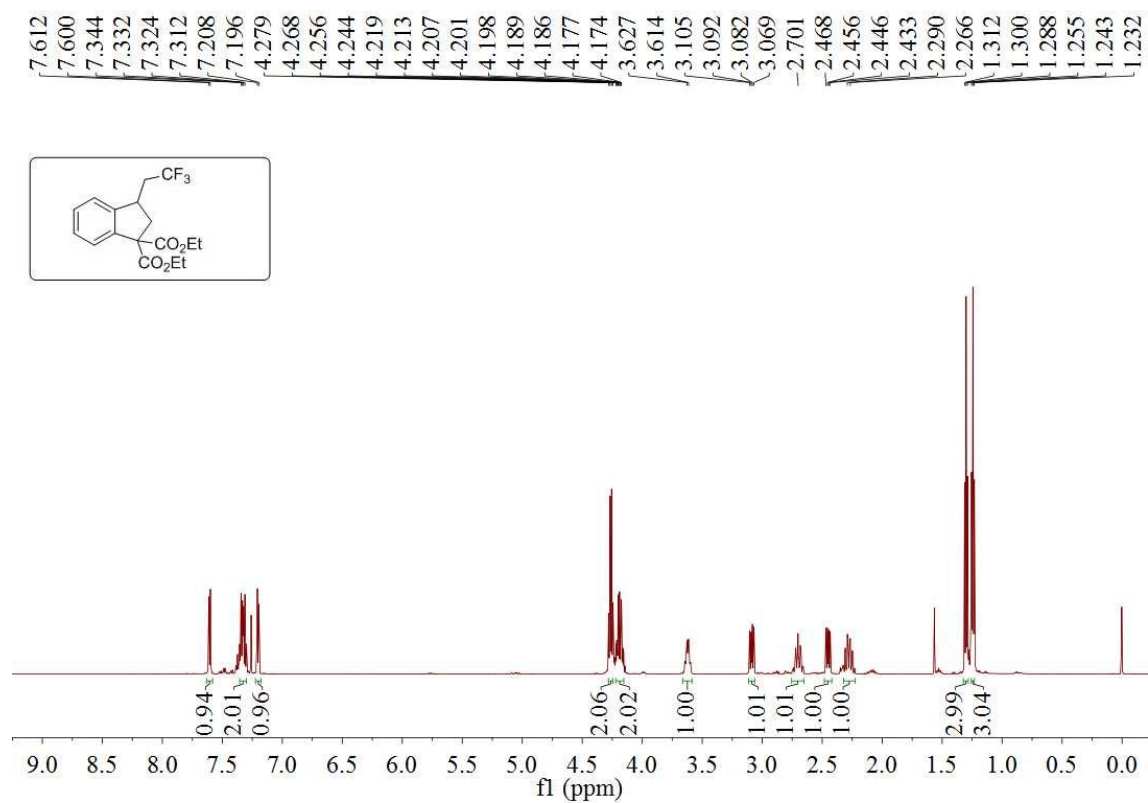

## $^{13}\text{C-NMR}$ Spectra of 4a



# SUPPORTING INFORMATION

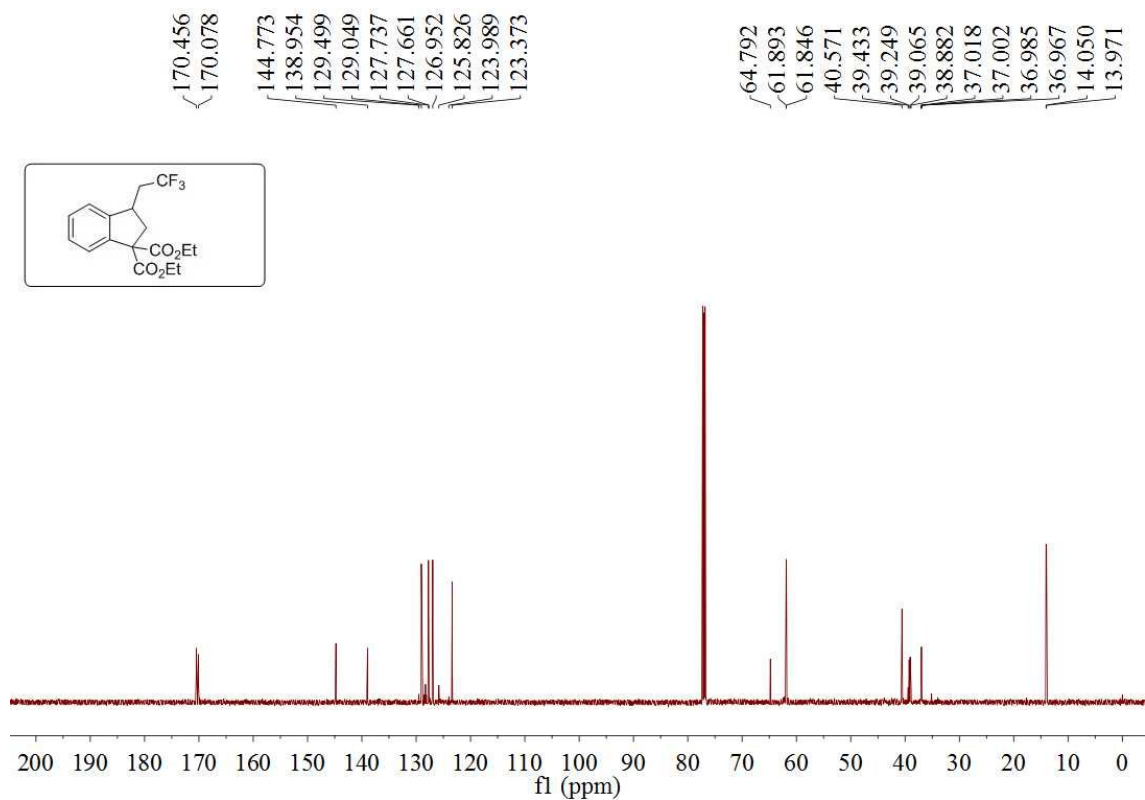

<sup>19</sup>F-NMR Spectra of 4a

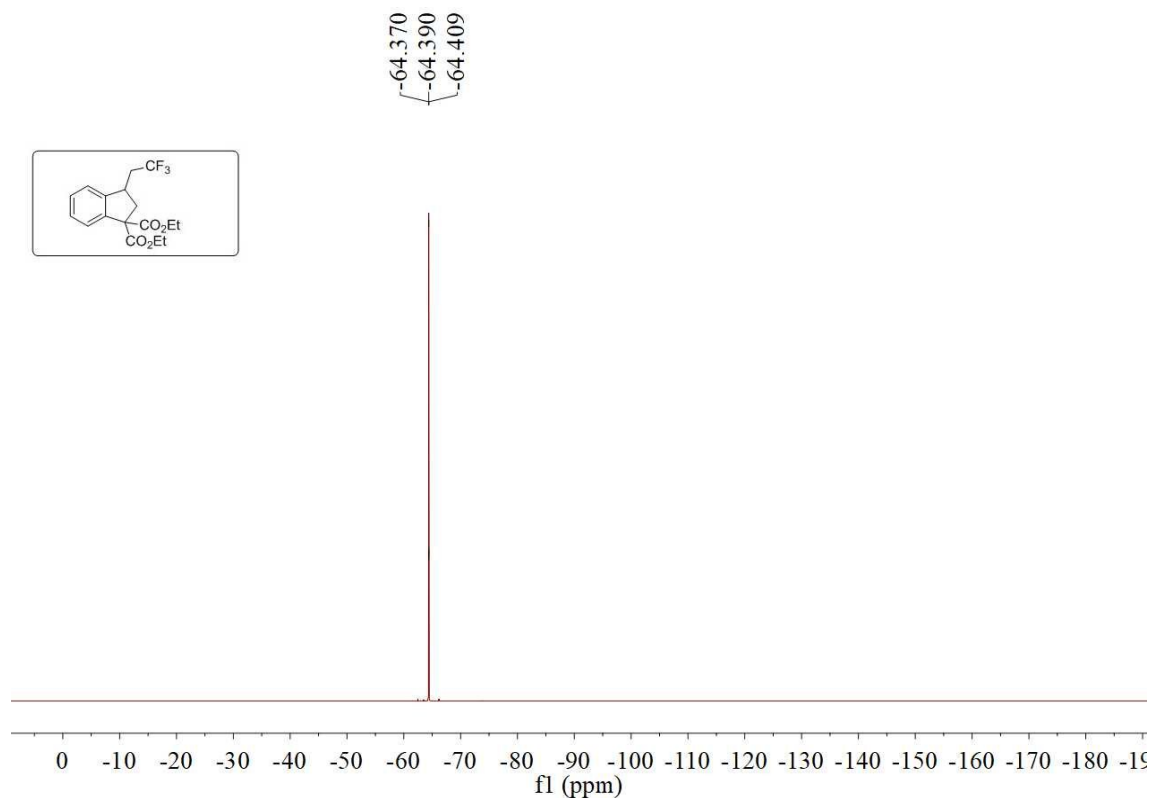

<sup>1</sup>H-NMR Spectra of 4b

# SUPPORTING INFORMATION

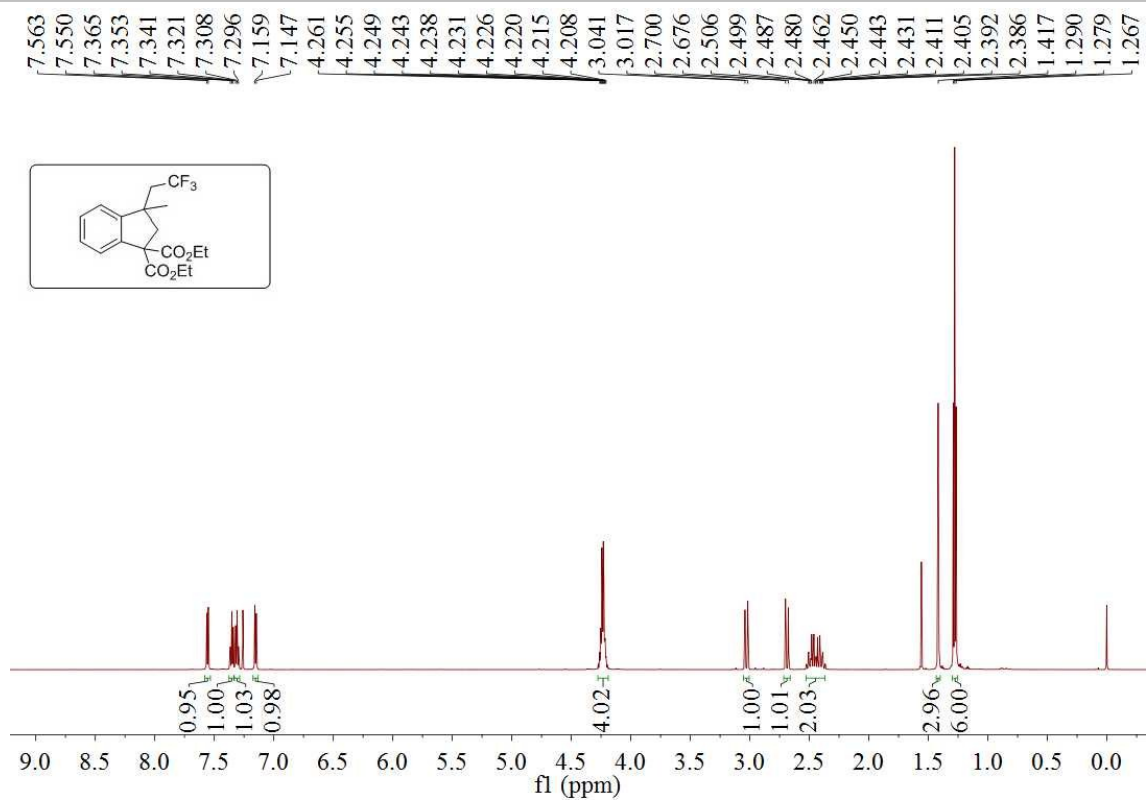

## <sup>13</sup>C-NMR Spectra of 4b

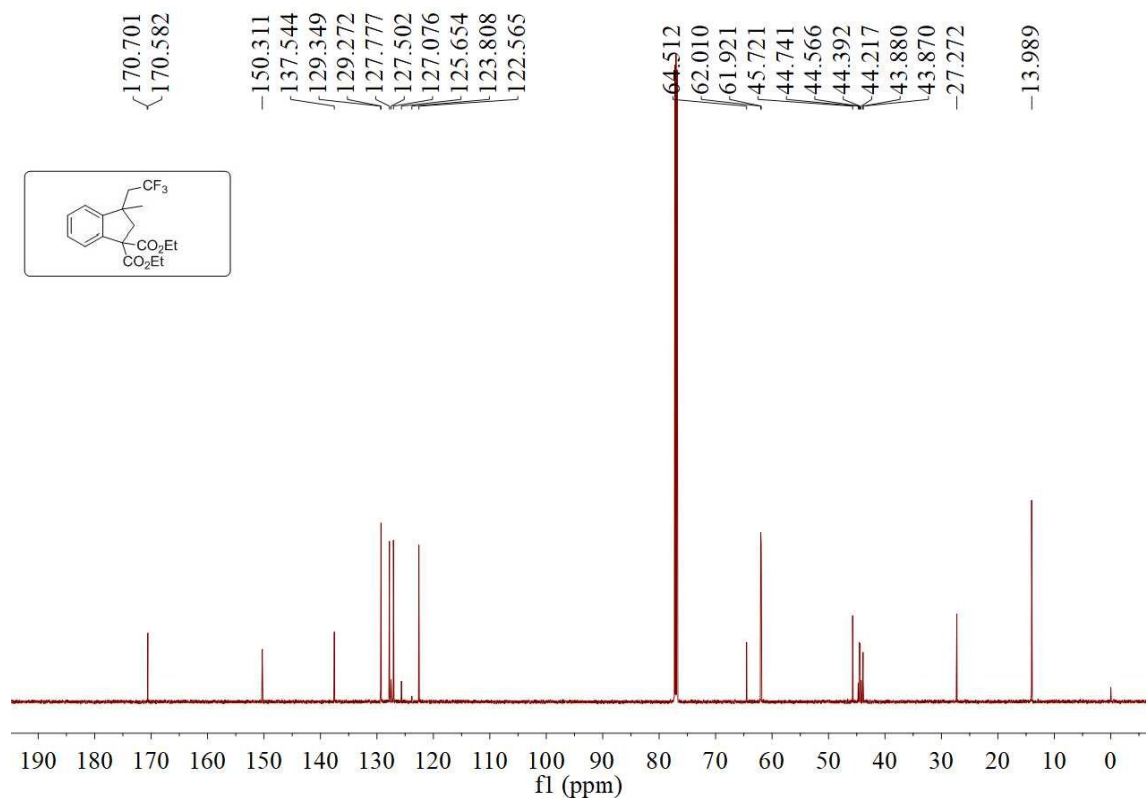

## <sup>19</sup>F-NMR Spectra of 4b

# SUPPORTING INFORMATION

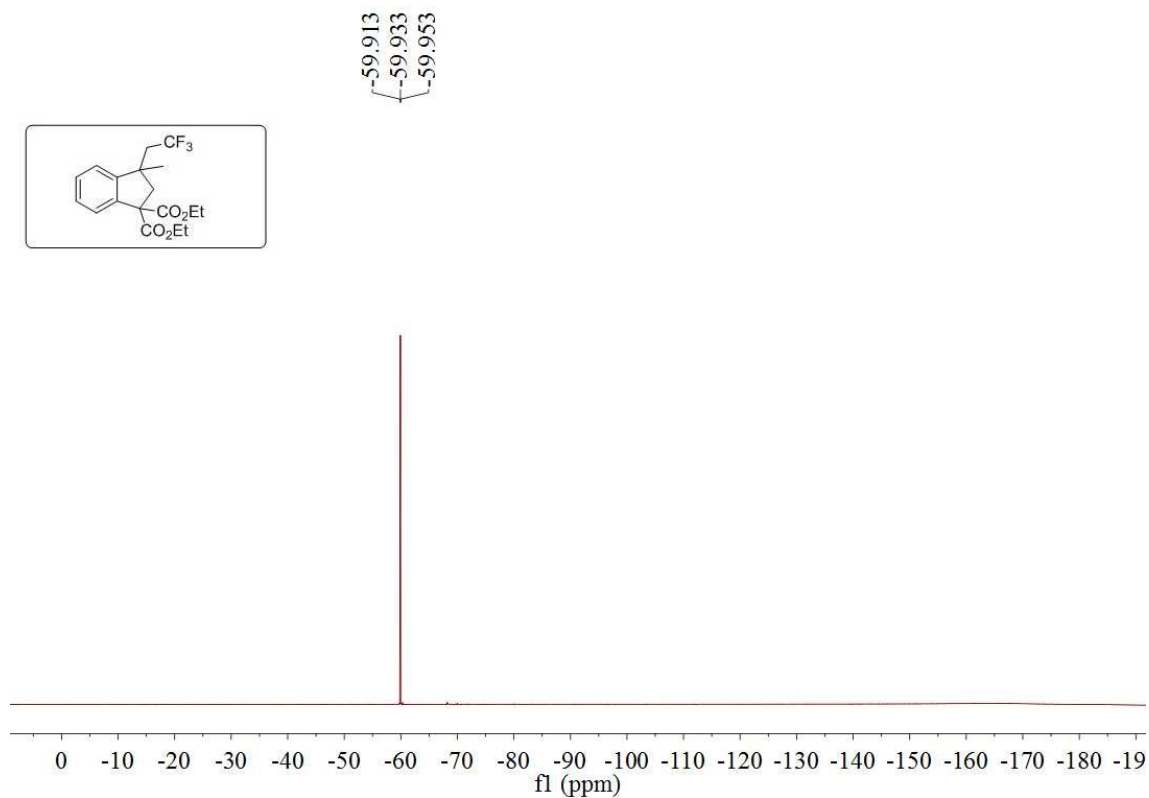

## <sup>1</sup>H-NMR Spectra of 4c

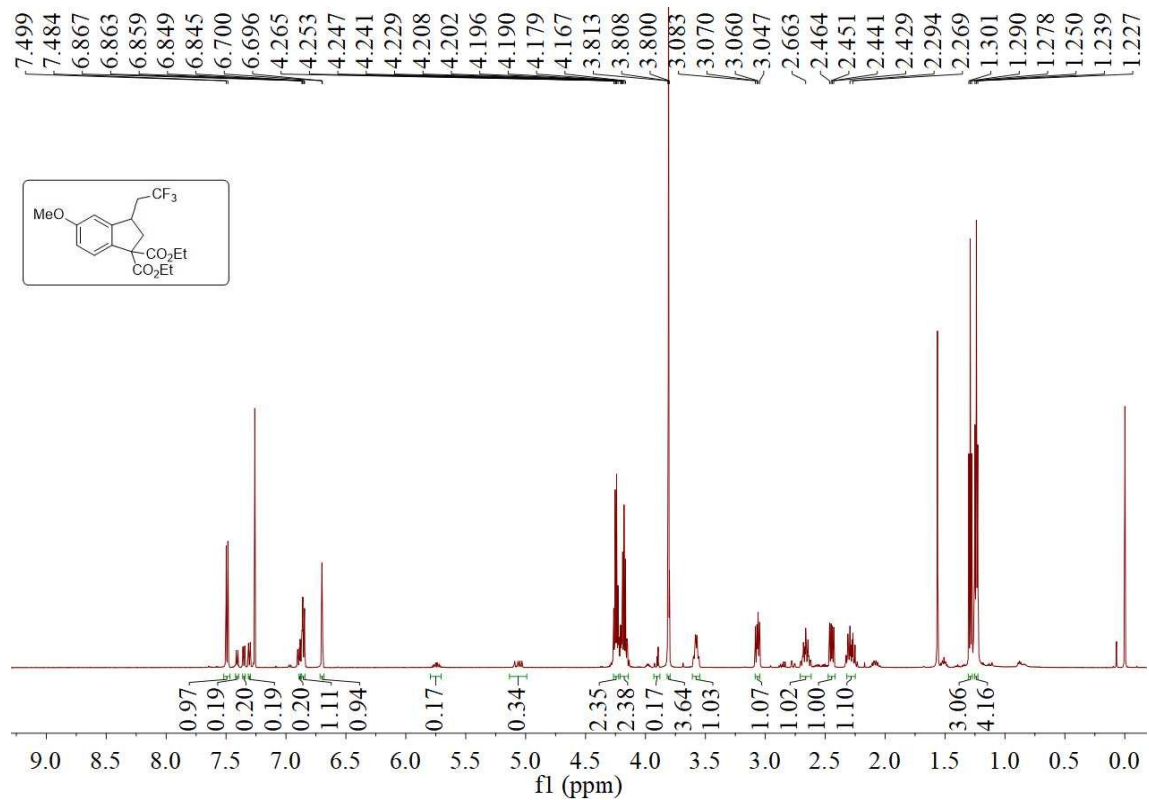

## <sup>13</sup>C-NMR Spectra of 4c

# SUPPORTING INFORMATION

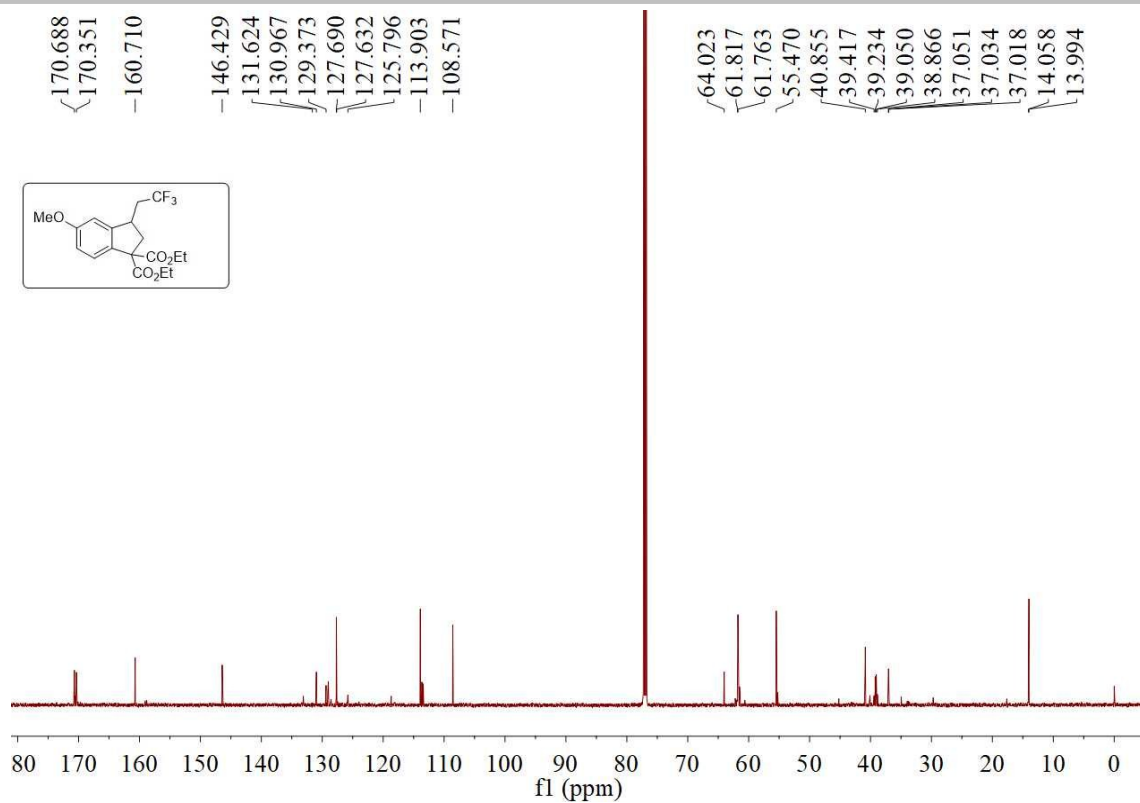

**<sup>19</sup>F-NMR Spectra of 4c**

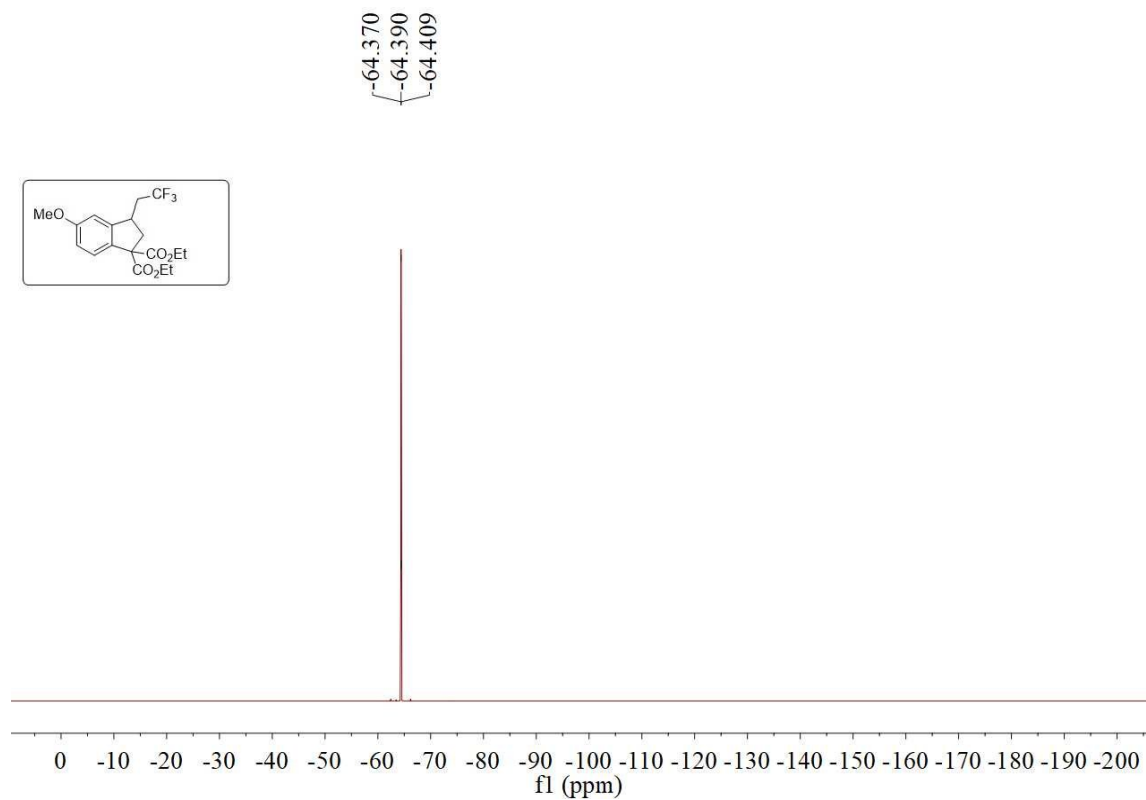

**<sup>1</sup>H-NMR Spectra of 4d**

# SUPPORTING INFORMATION

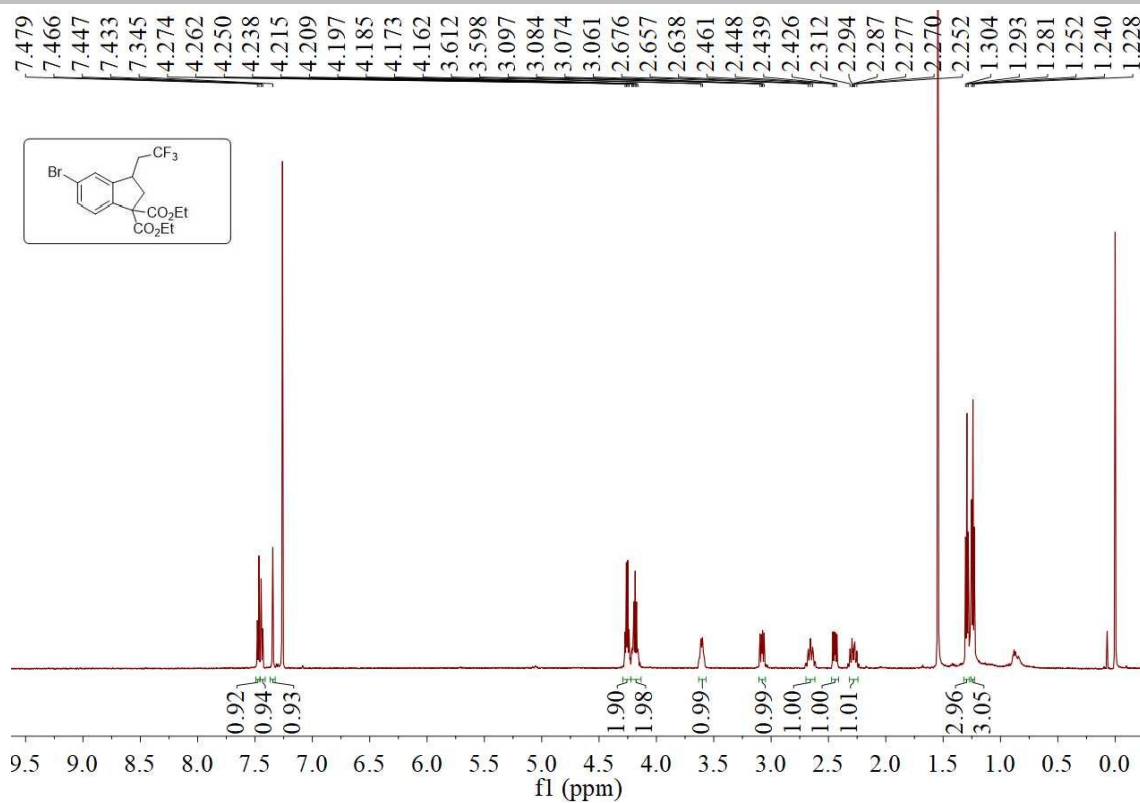

<sup>13</sup>C-NMR Spectra of 4d

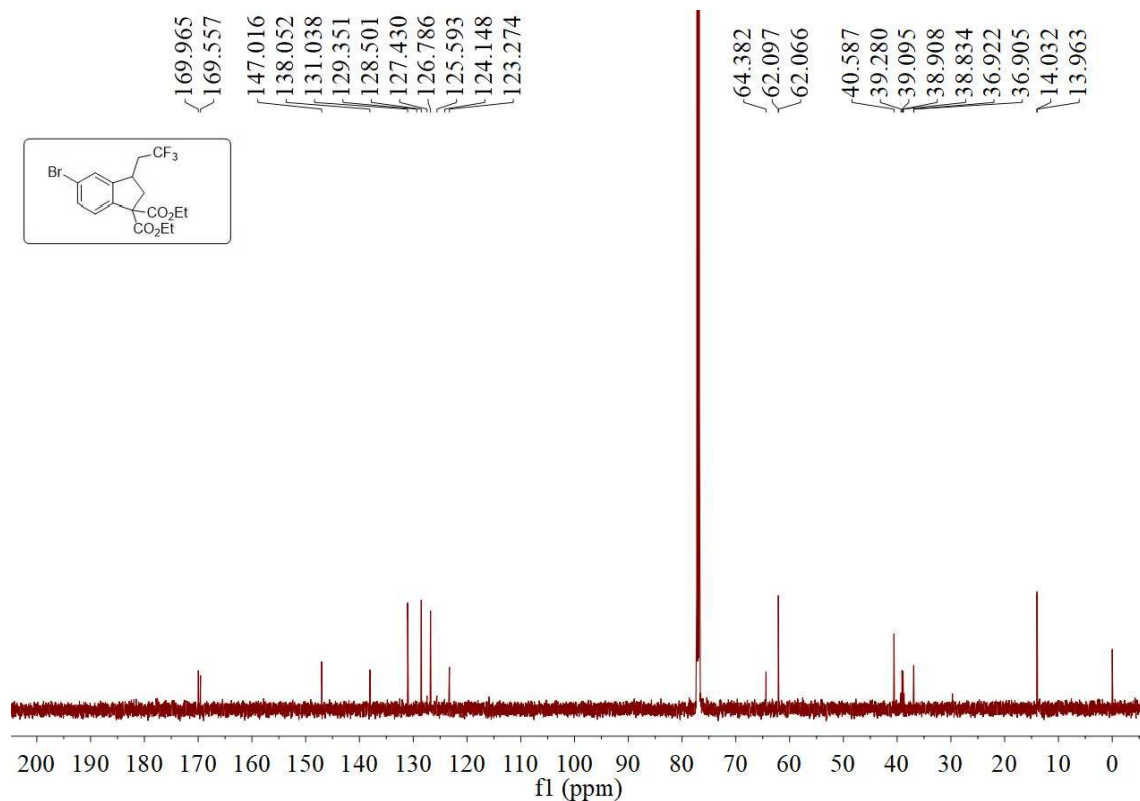

<sup>19</sup>F-NMR Spectra of 4d

# SUPPORTING INFORMATION

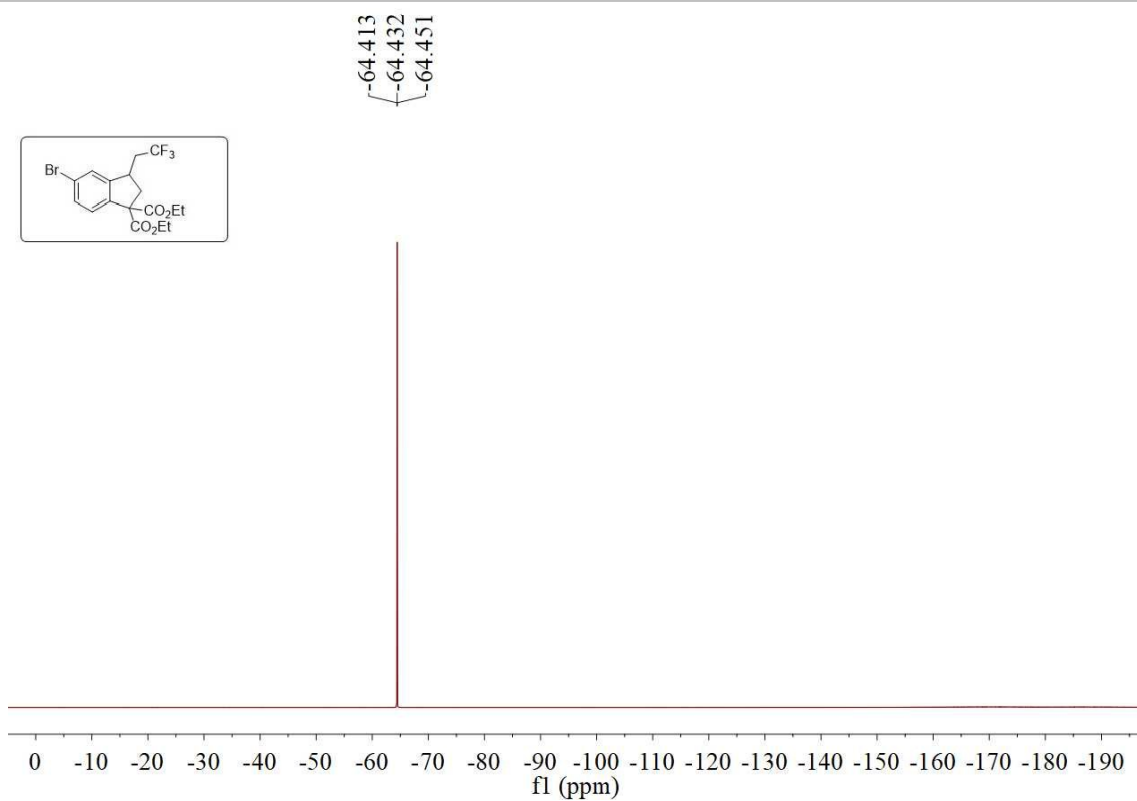

## $^1\text{H-NMR}$ Spectra of 4e

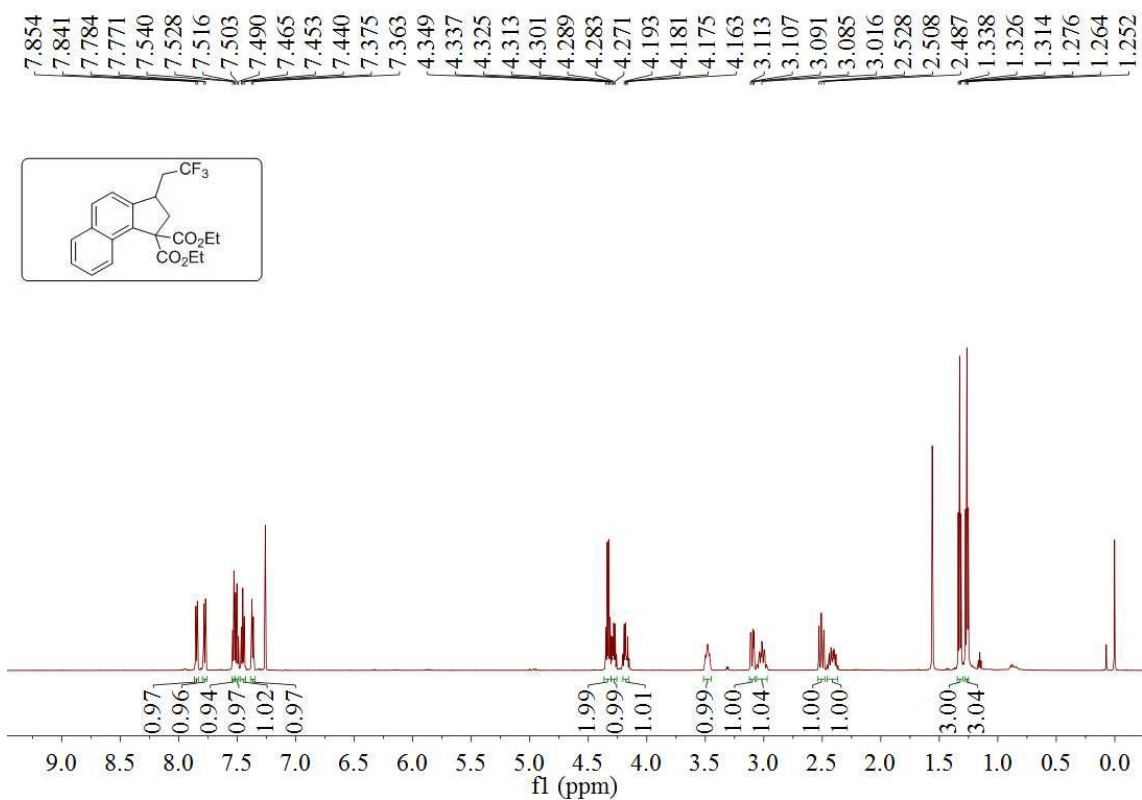

## $^{13}\text{C-NMR}$ Spectra of 4e

## SUPPORTING INFORMATION

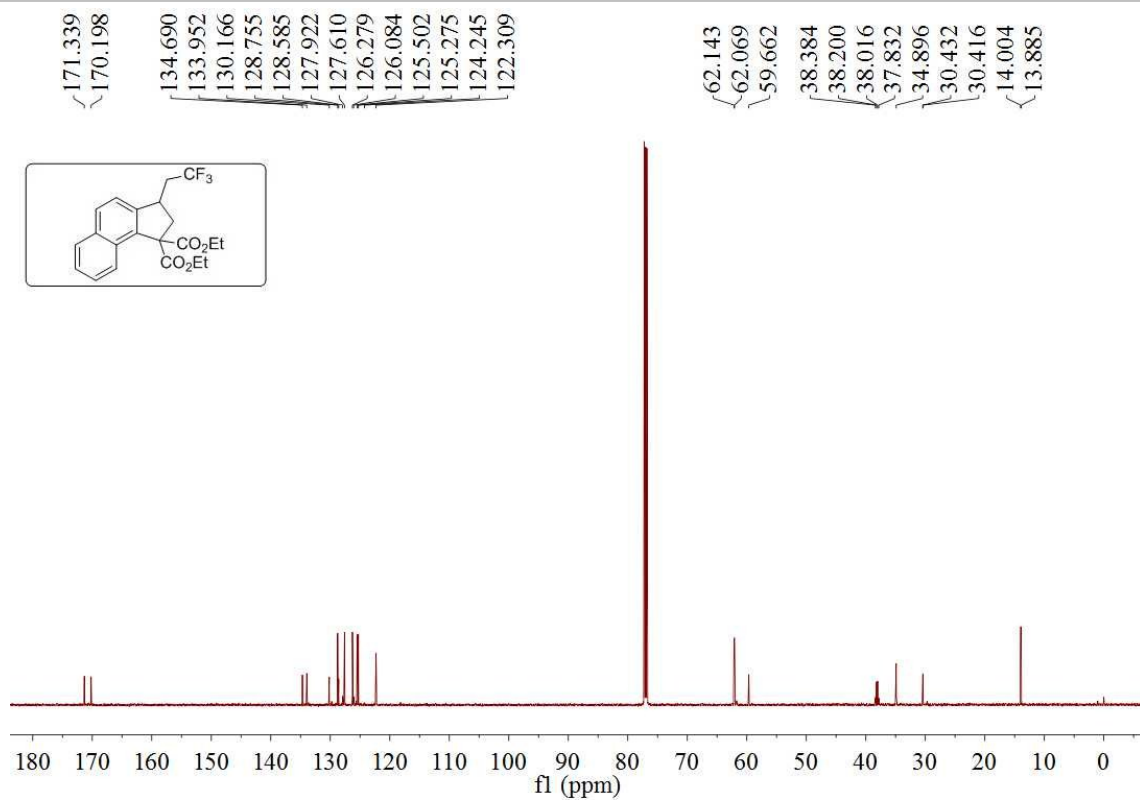

<sup>19</sup>F-NMR Spectra of 4e

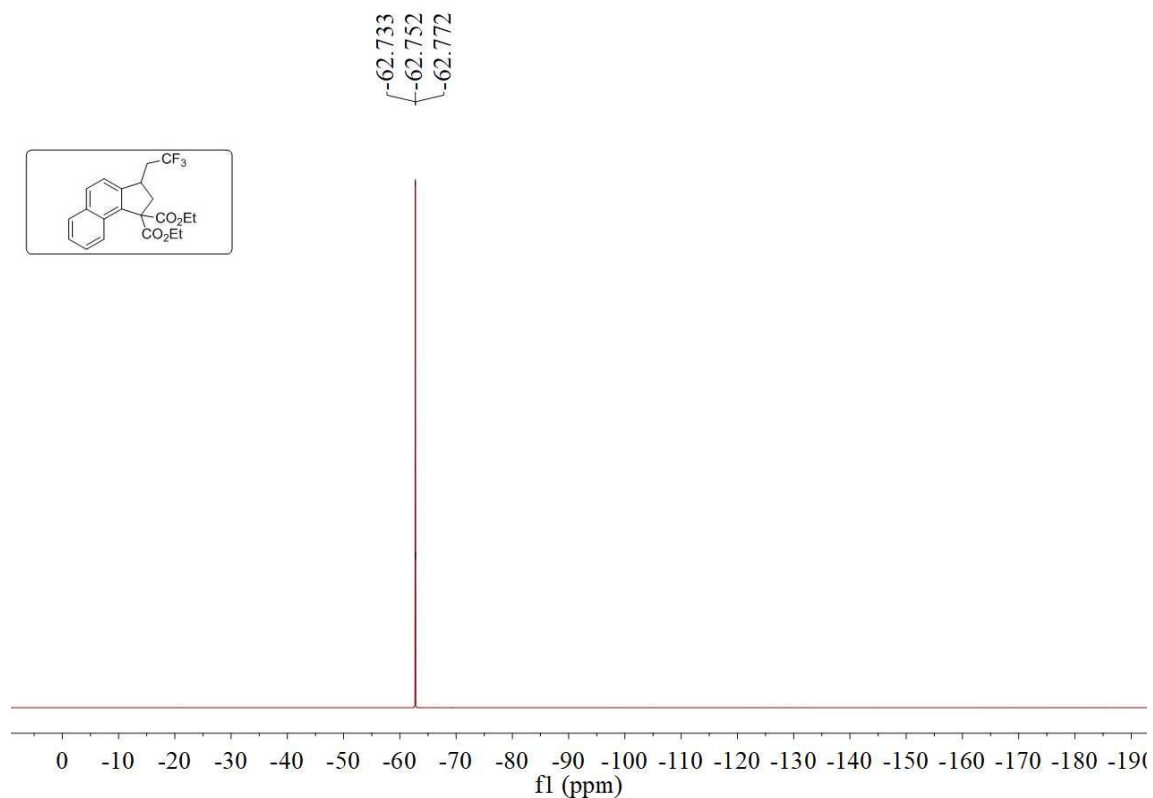

<sup>1</sup>H-NMR Spectra of 6a

# SUPPORTING INFORMATION

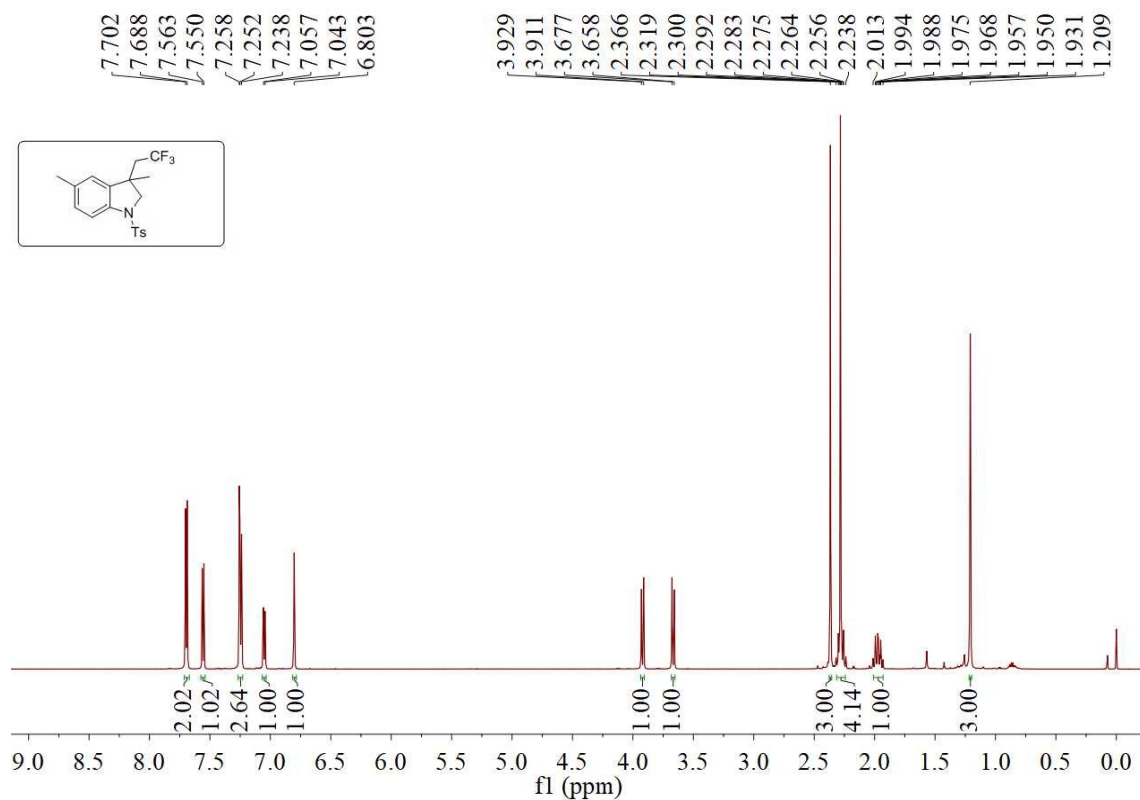

**<sup>13</sup>C-NMR Spectra of 6a**

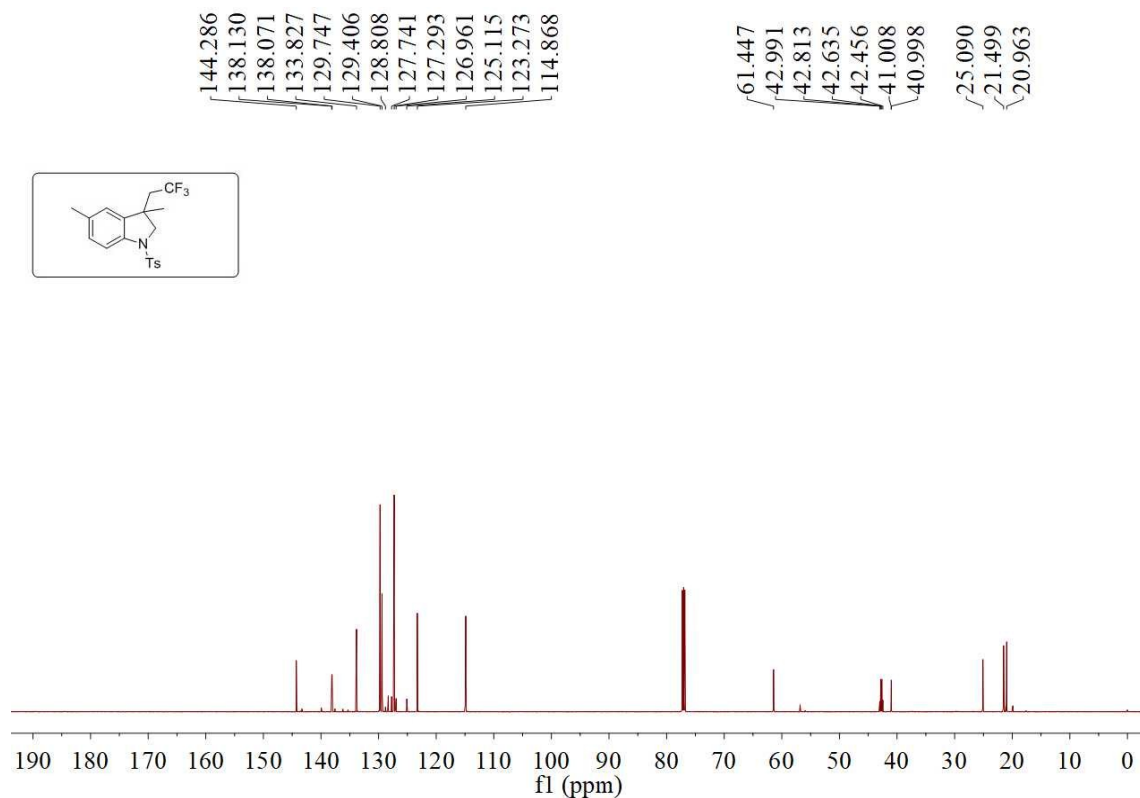

**<sup>19</sup>F-NMR Spectra of 6a**



# SUPPORTING INFORMATION

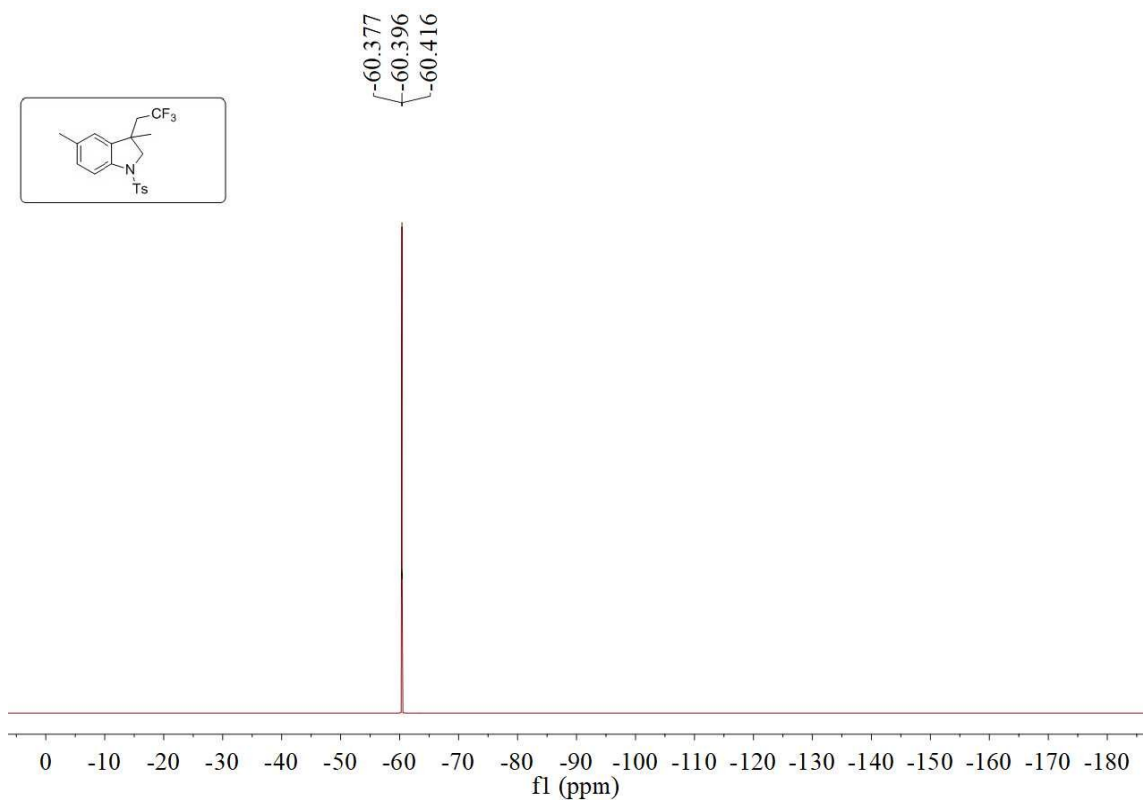

## **1H-NMR Spectra of 6b**

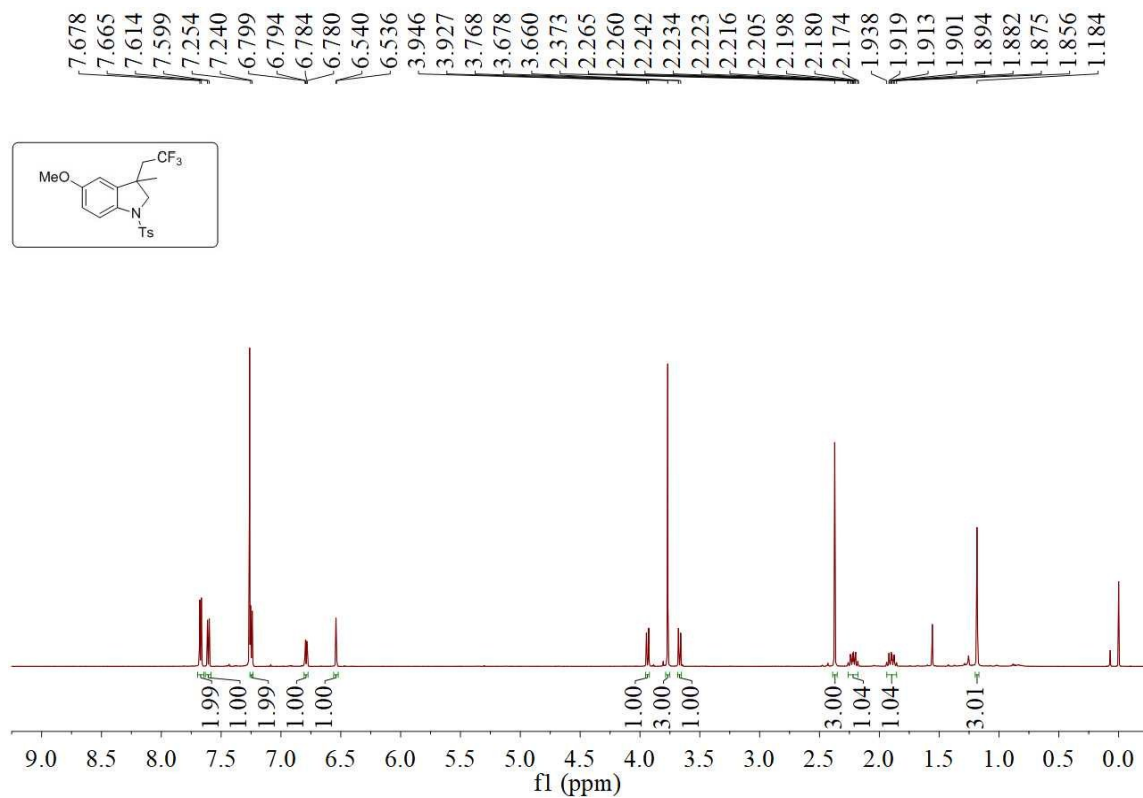

## **13C-NMR Spectra of 6b**

# SUPPORTING INFORMATION

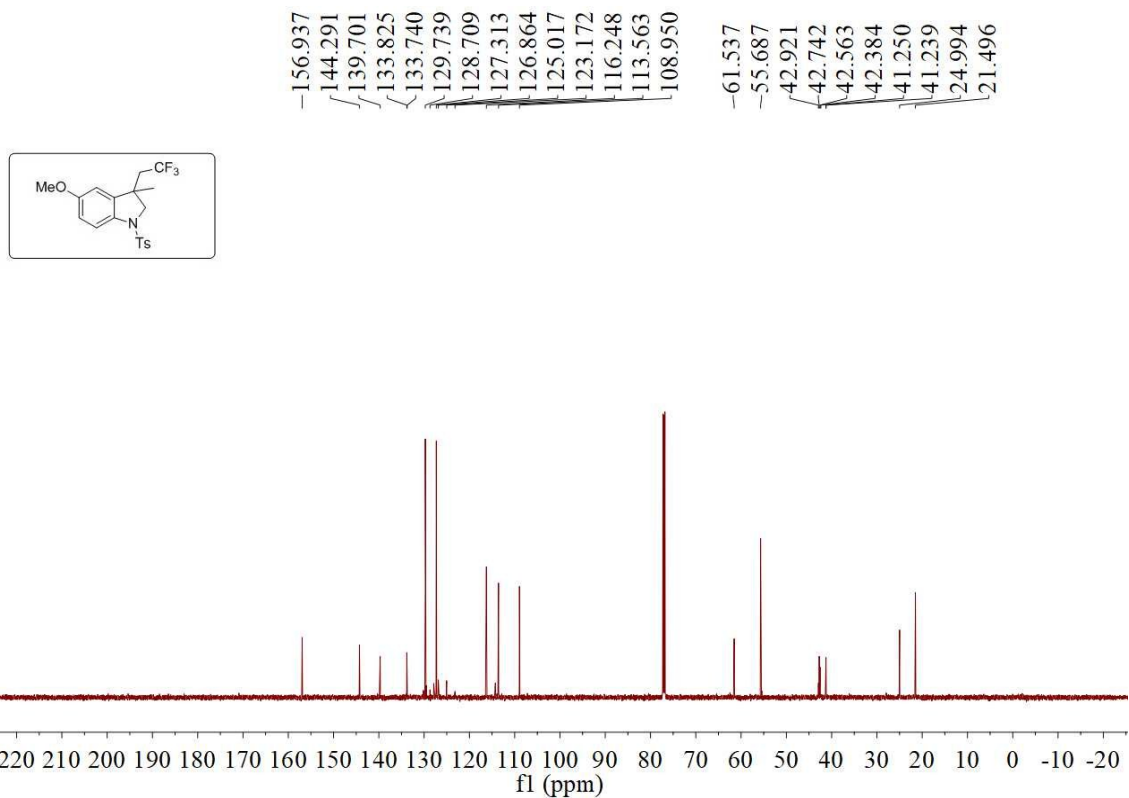

**<sup>19</sup>F-NMR Spectra of 6b**

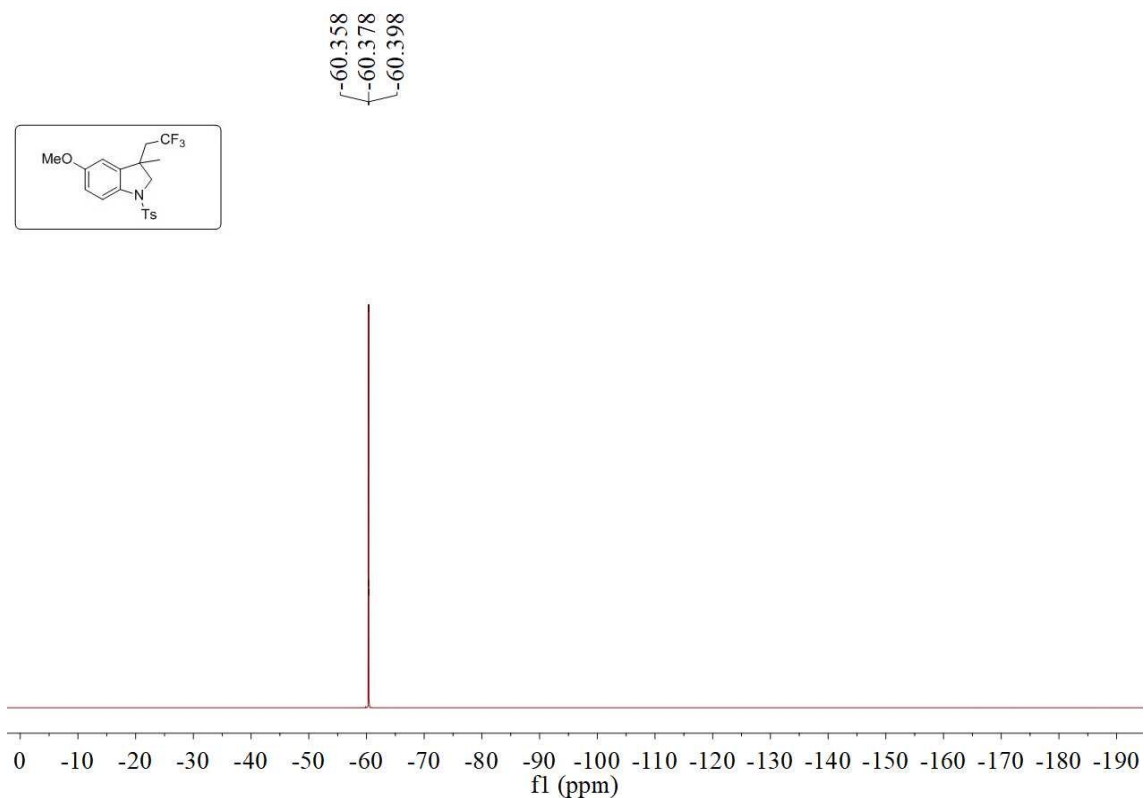

**<sup>1</sup>H-NMR Spectra of 6c**

# SUPPORTING INFORMATION

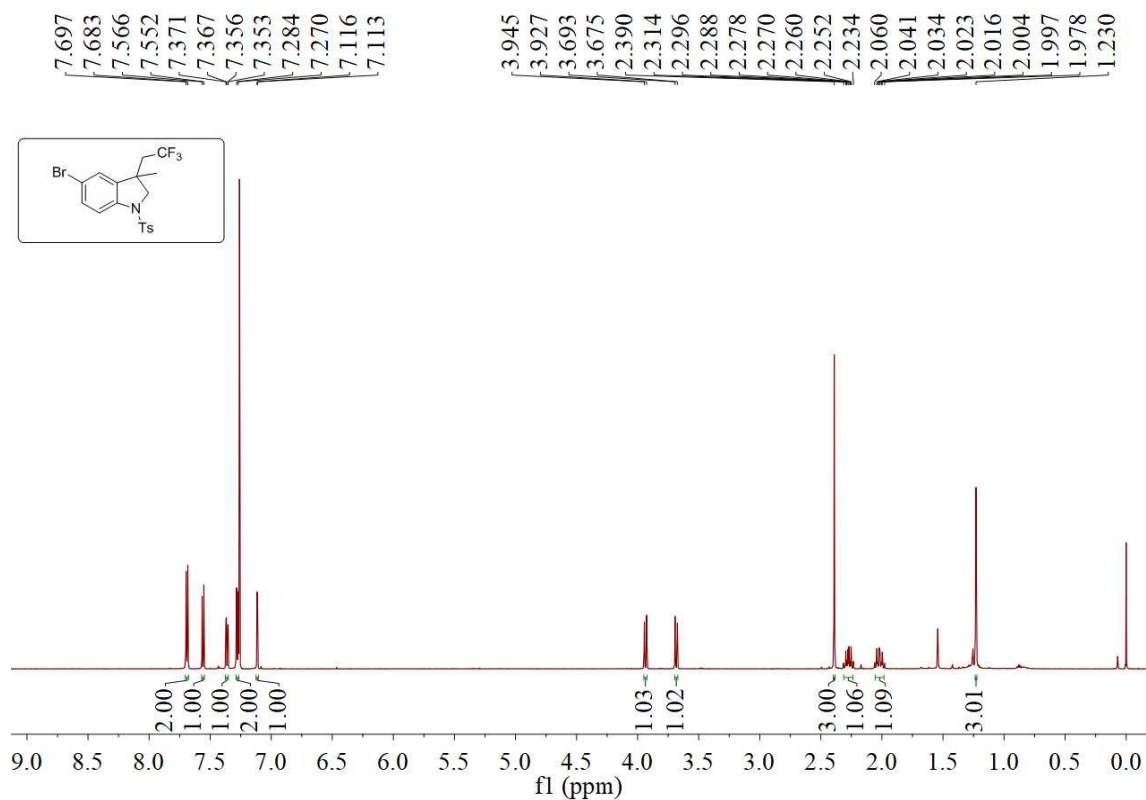

<sup>13</sup>C-NMR Spectra of 6c

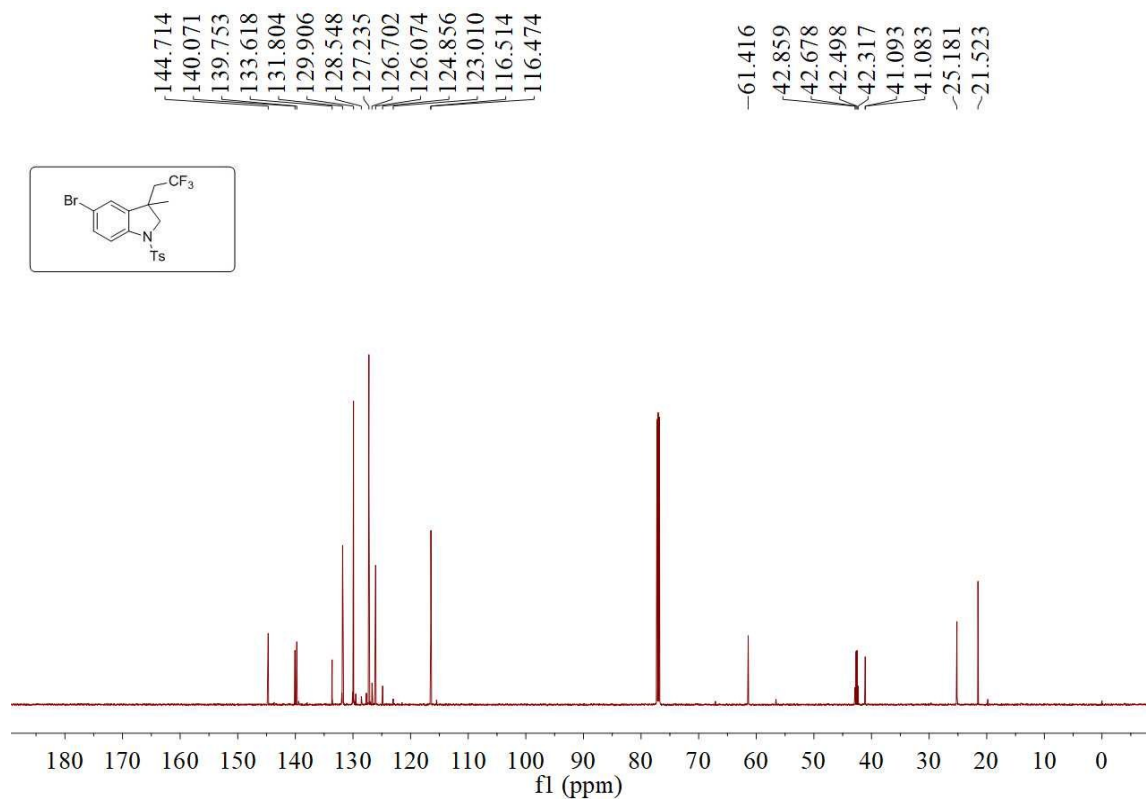

<sup>19</sup>F-NMR Spectra of 6c

# SUPPORTING INFORMATION

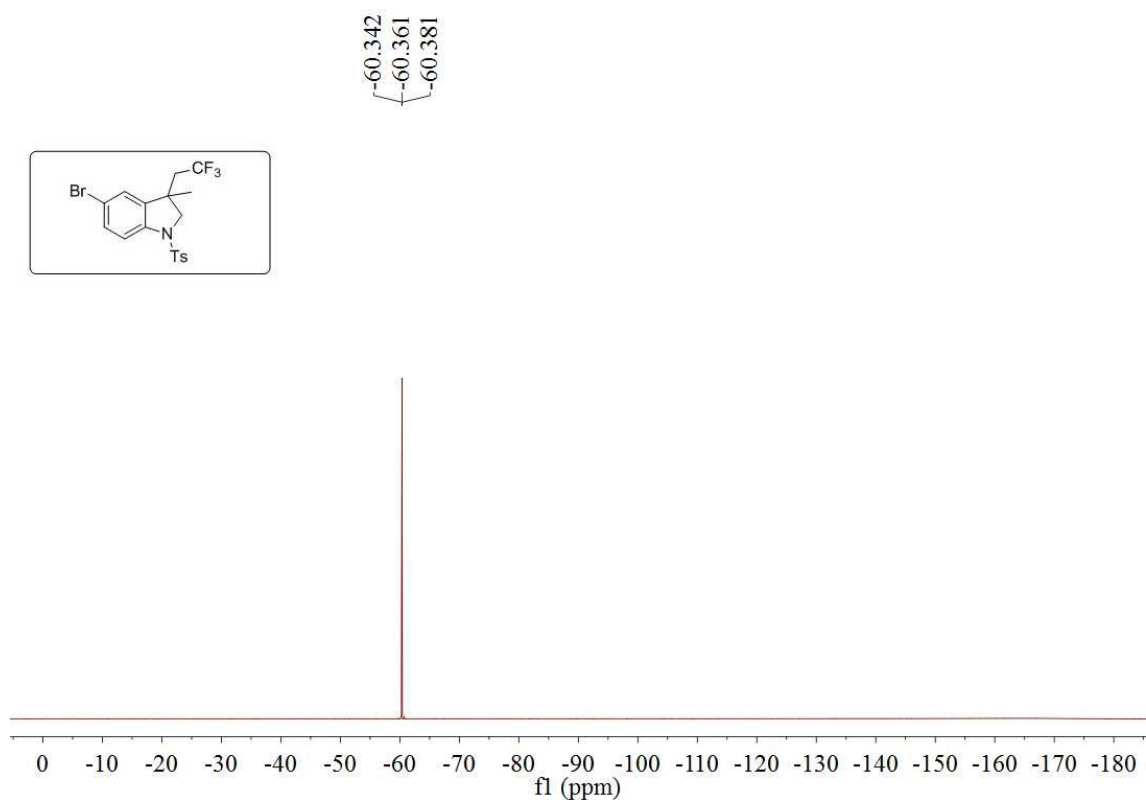

## <sup>1</sup>H-NMR Spectra of 6d

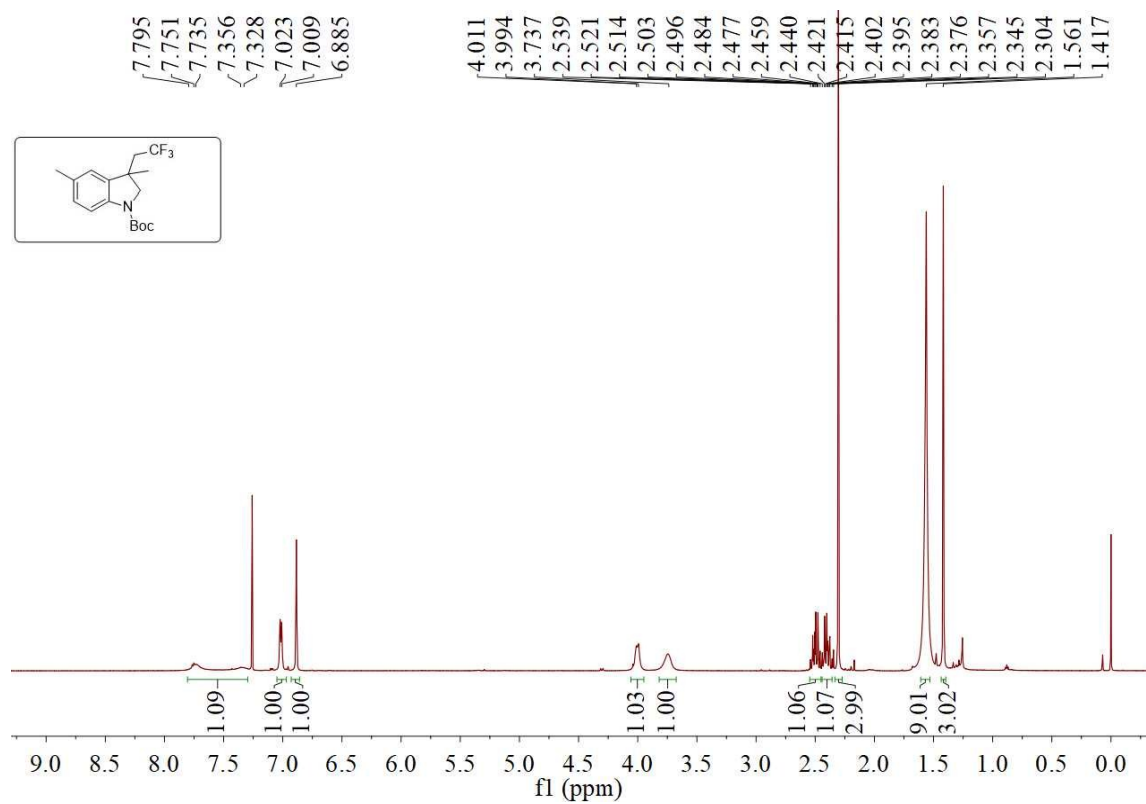

## <sup>13</sup>C-NMR Spectra of 6d

# SUPPORTING INFORMATION

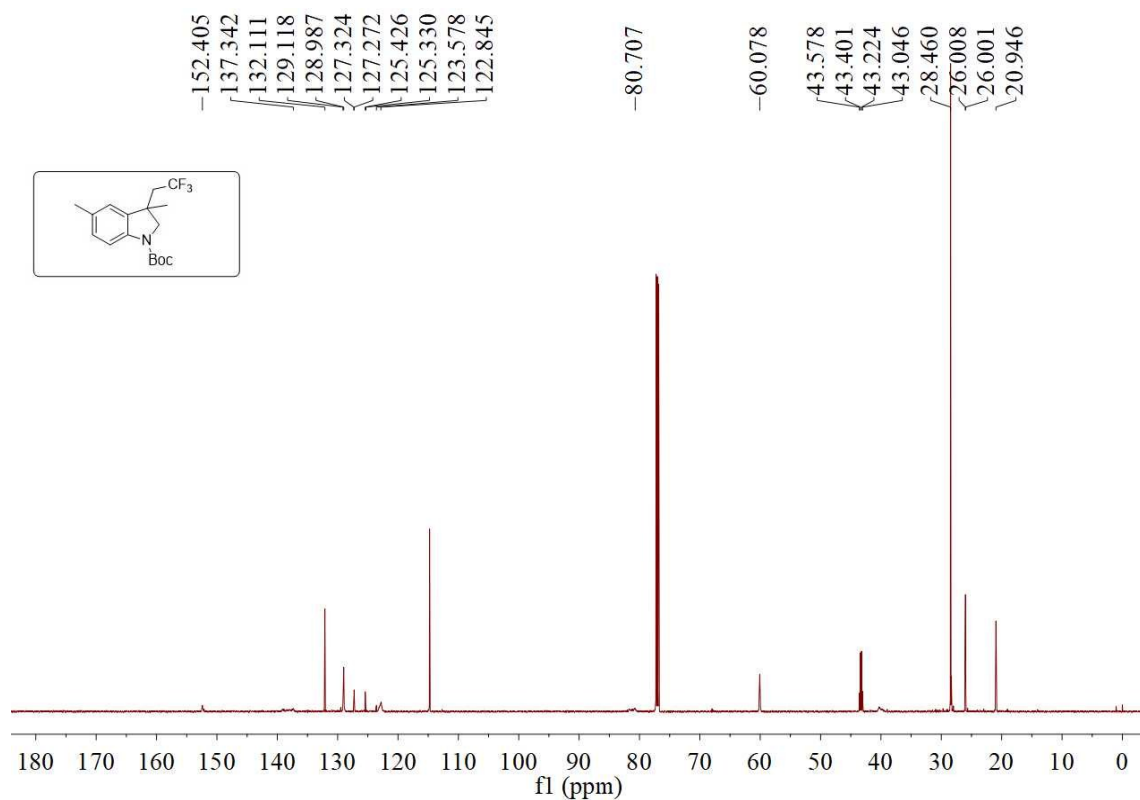

**<sup>19</sup>F-NMR Spectra of 6d**

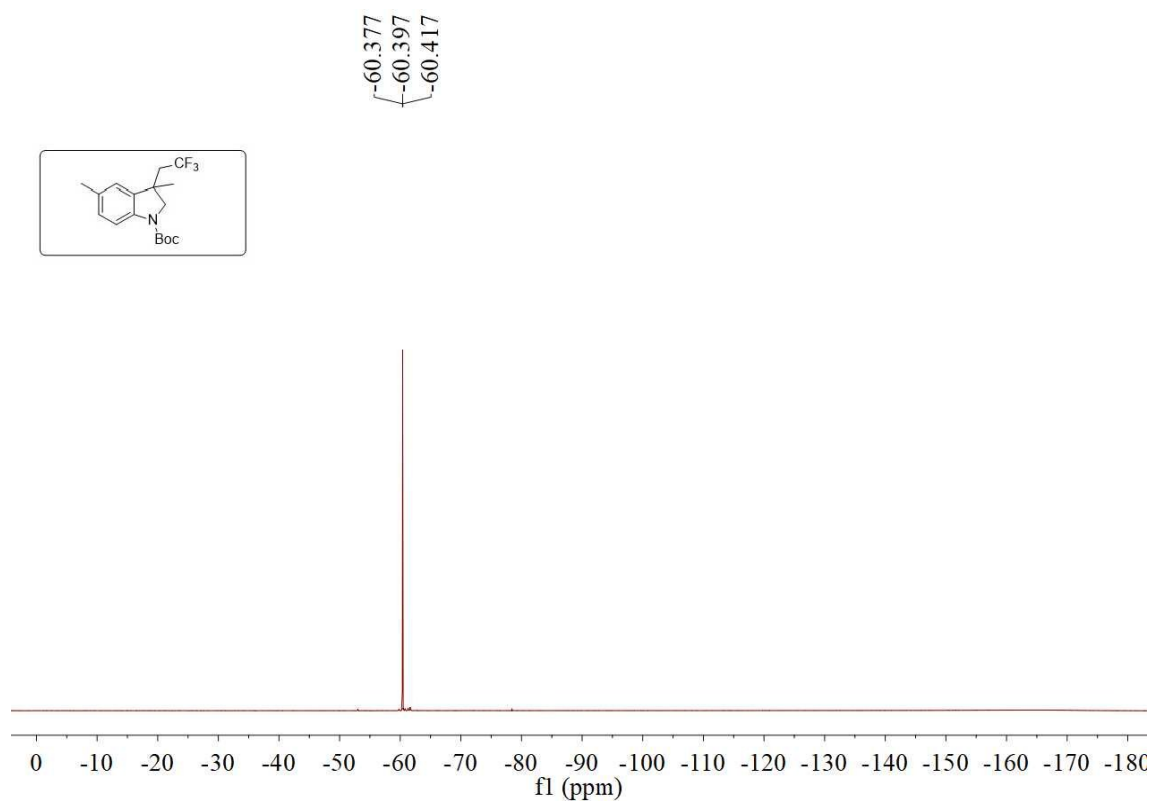

**<sup>1</sup>H-NMR Spectra of 6e**

# SUPPORTING INFORMATION

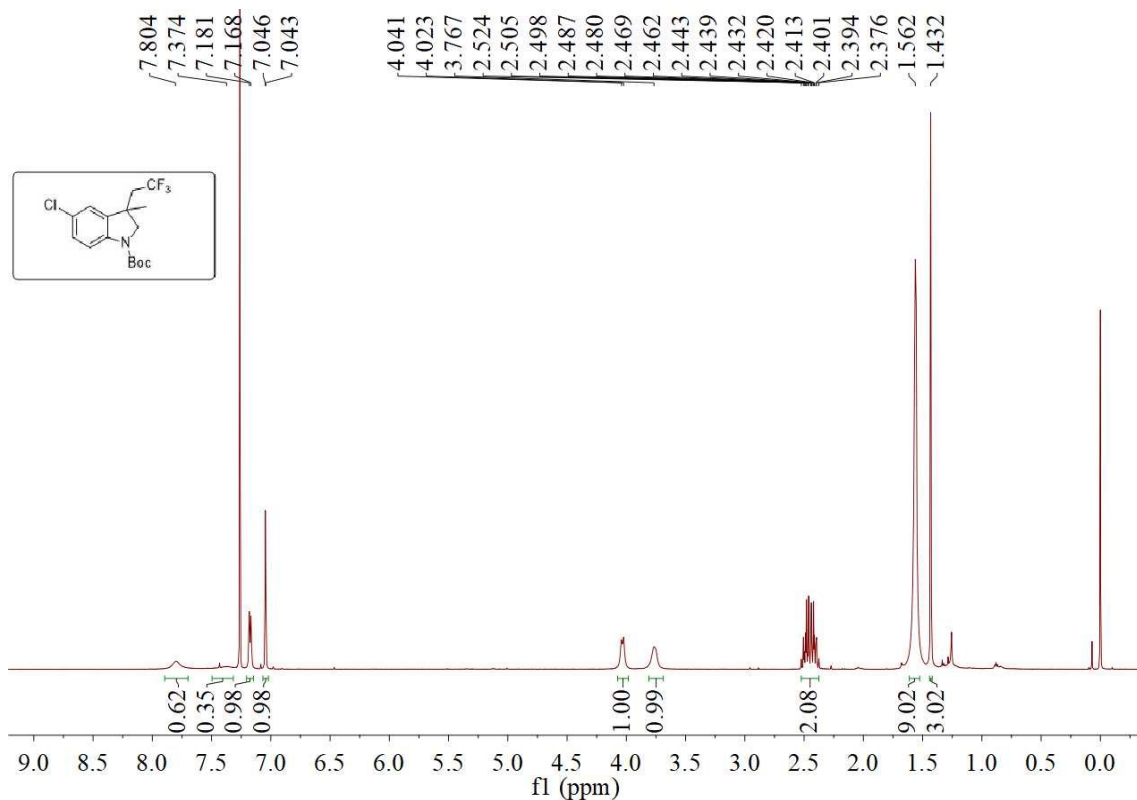

**<sup>13</sup>C-NMR Spectra of 6e**

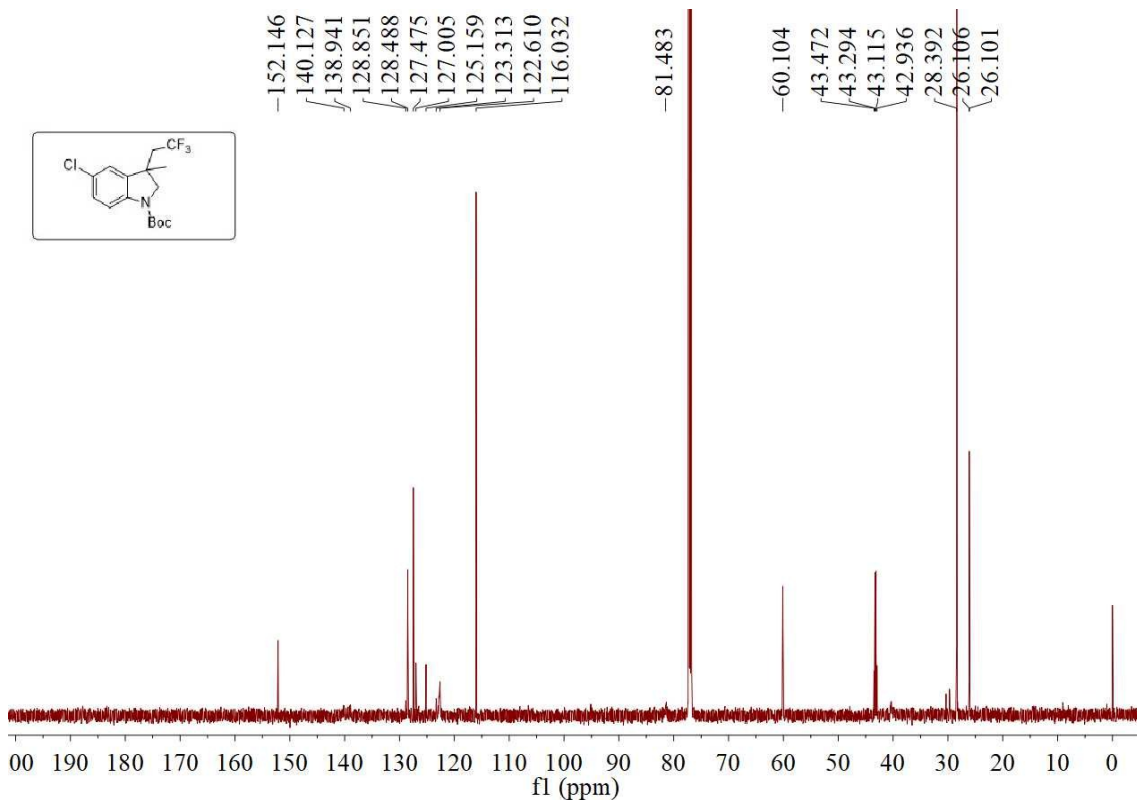

**<sup>19</sup>F-NMR Spectra of 6e**

# SUPPORTING INFORMATION

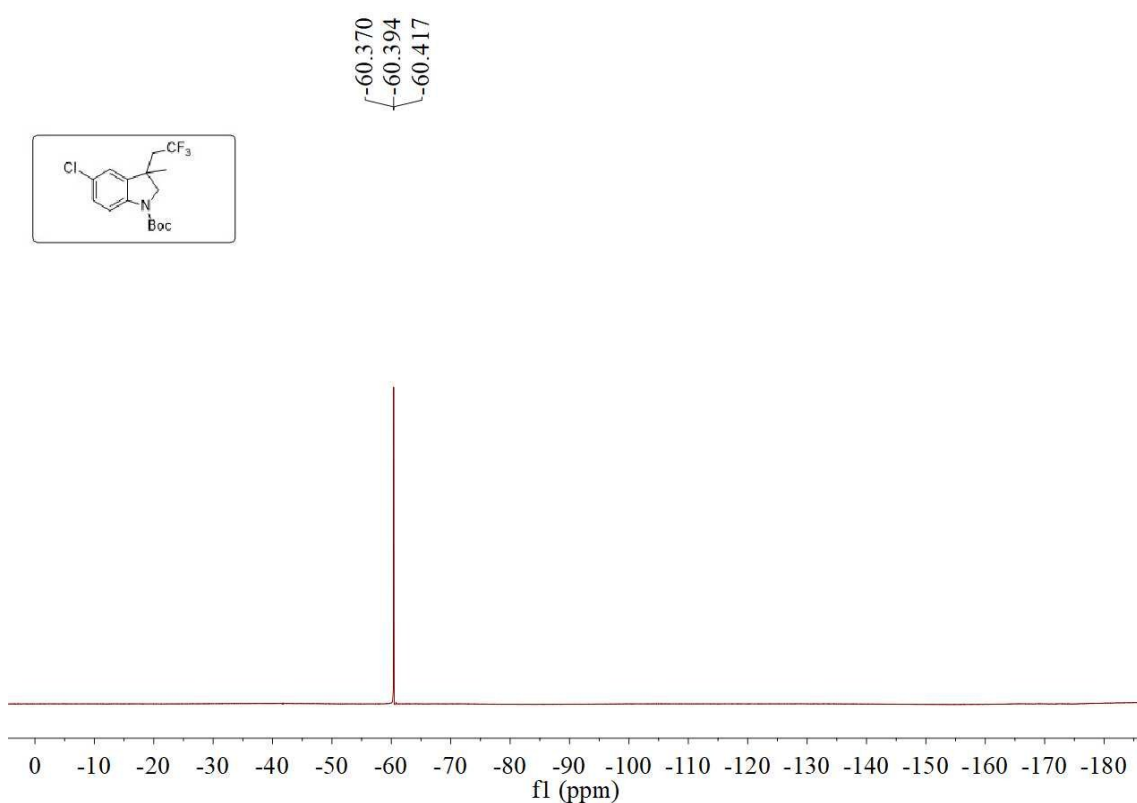

## $^1\text{H-NMR}$ Spectra of 6f

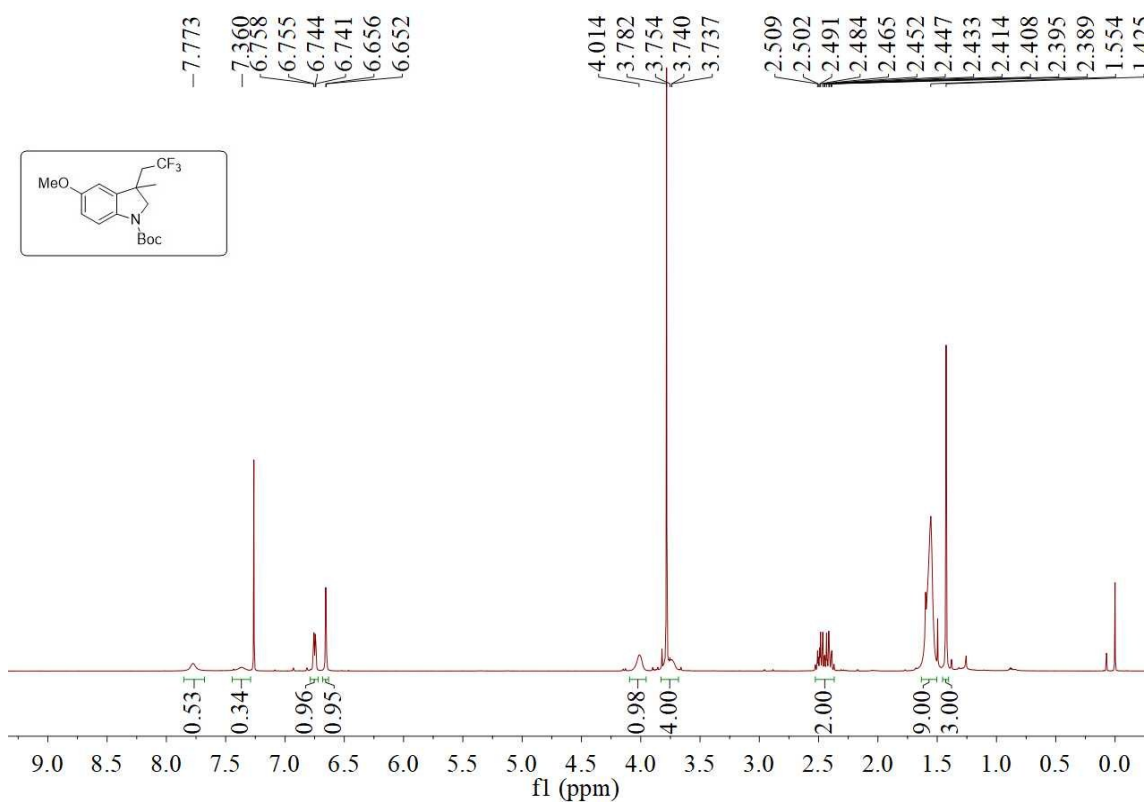

## $^{13}\text{C-NMR}$ Spectra of 6f

# SUPPORTING INFORMATION

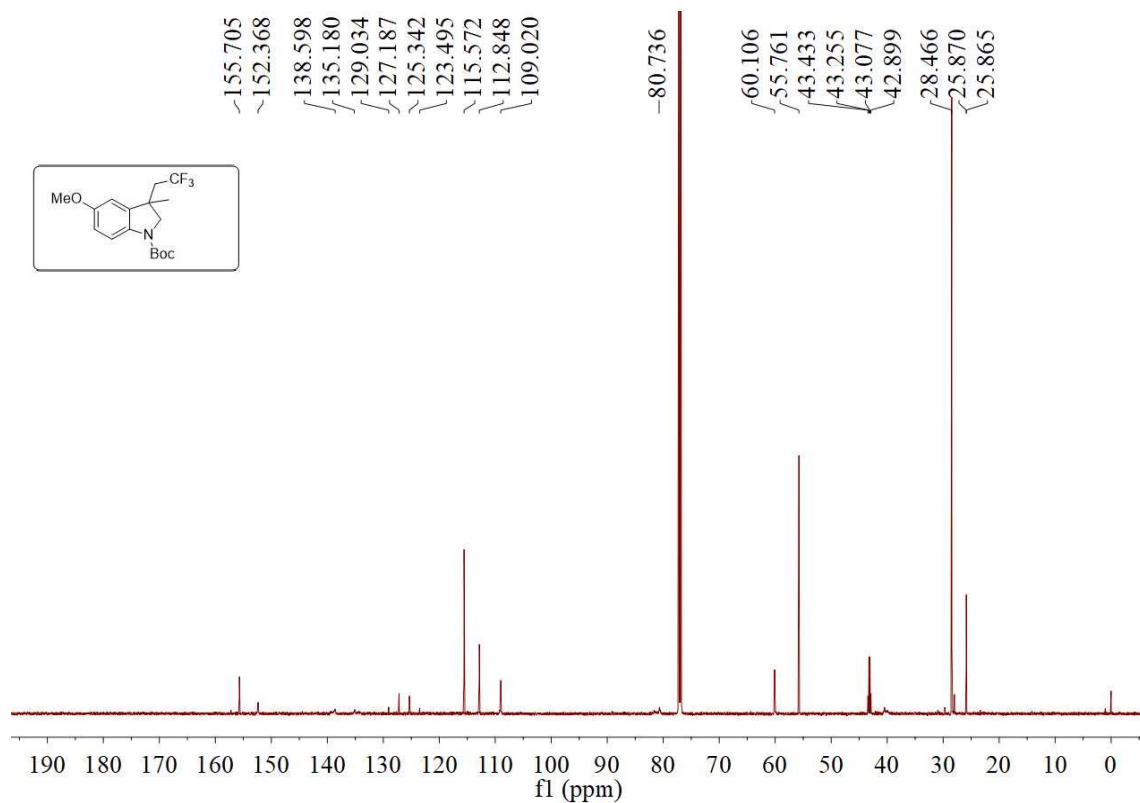

## <sup>19</sup>F-NMR Spectra of 6f

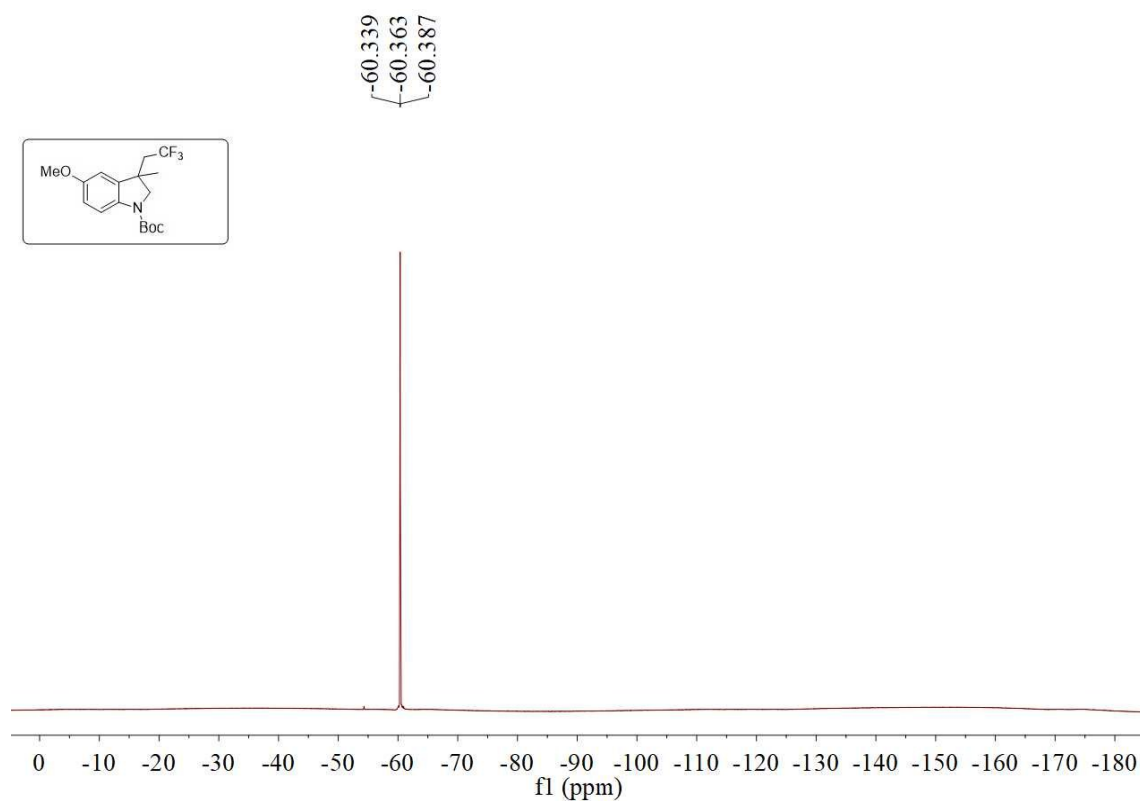

## <sup>1</sup>H-NMR Spectra of 6g



# SUPPORTING INFORMATION

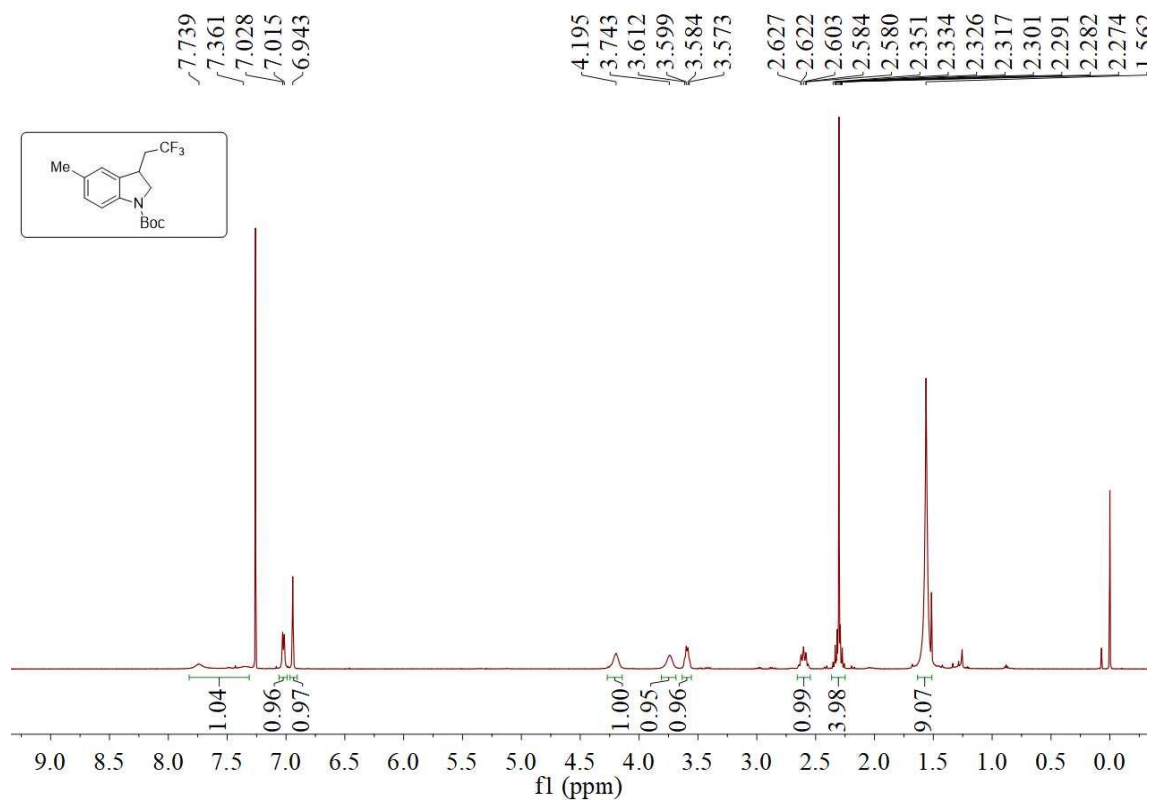

<sup>13</sup>C-NMR Spectra of 6g

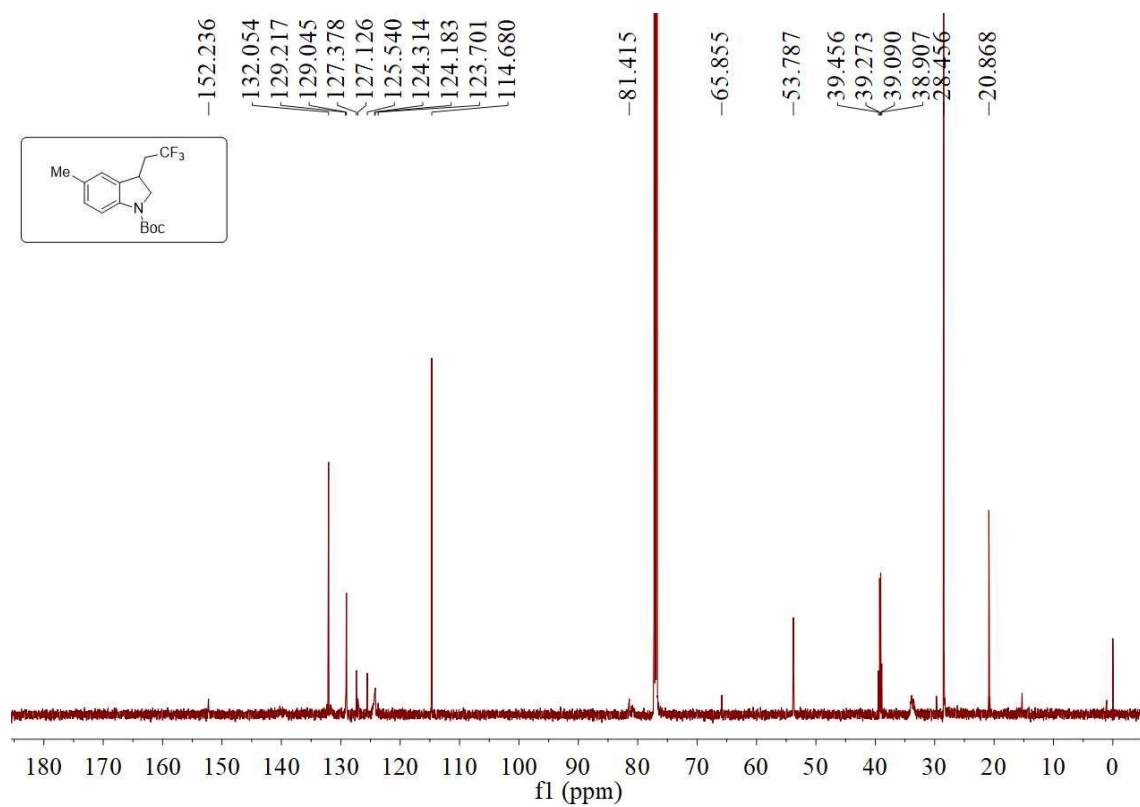

<sup>19</sup>F-NMR Spectra of 6g

# SUPPORTING INFORMATION

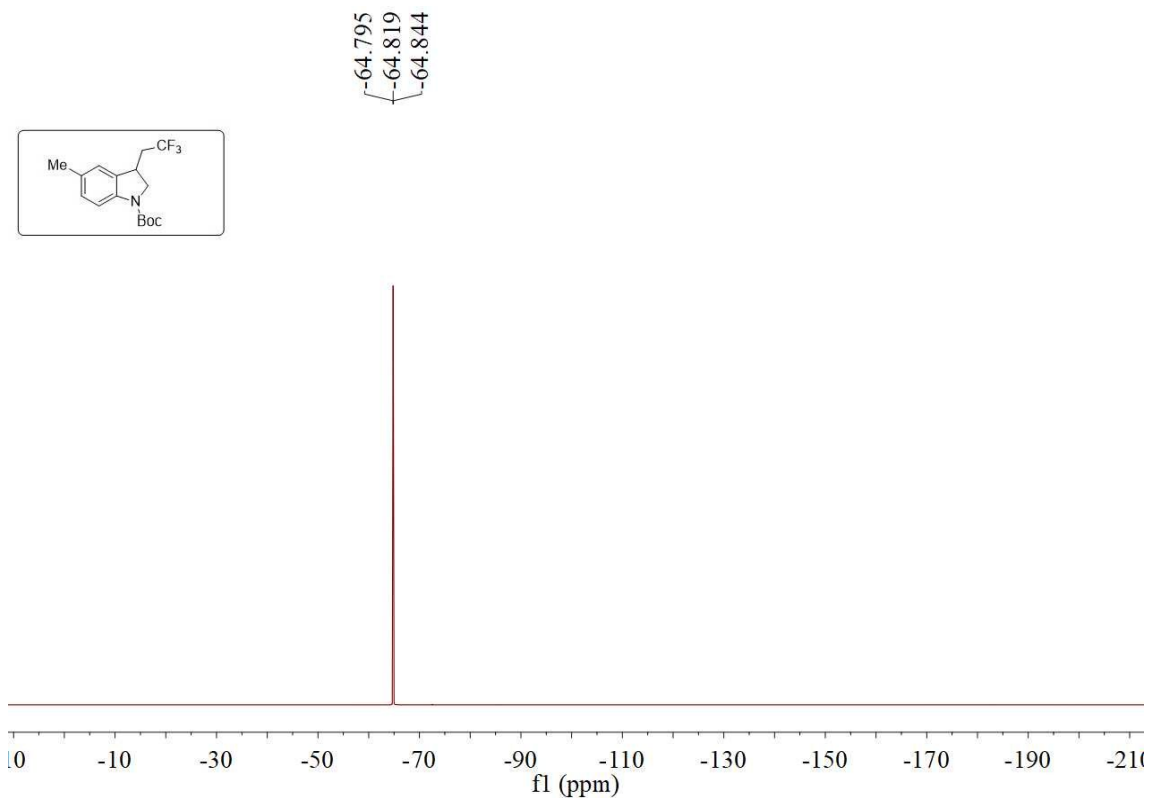

## $^1\text{H-NMR}$ Spectra of 6h

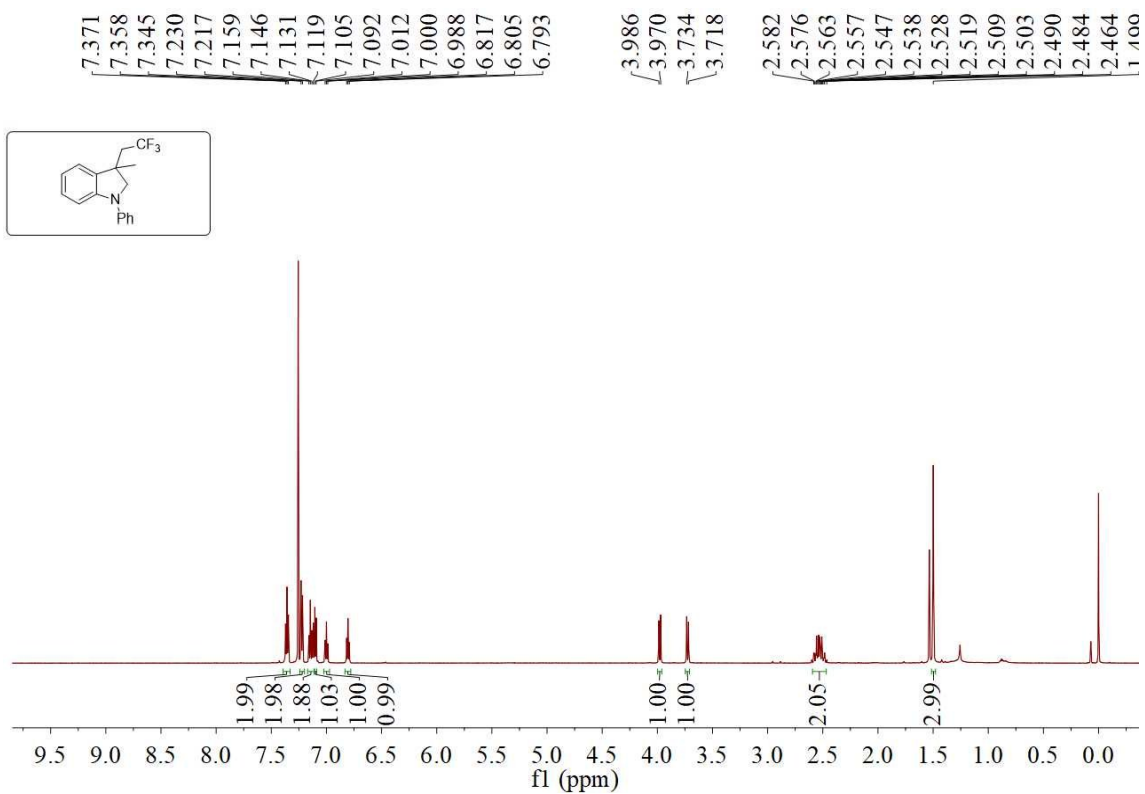

## $^{13}\text{C-NMR}$ Spectra of 6h

# SUPPORTING INFORMATION

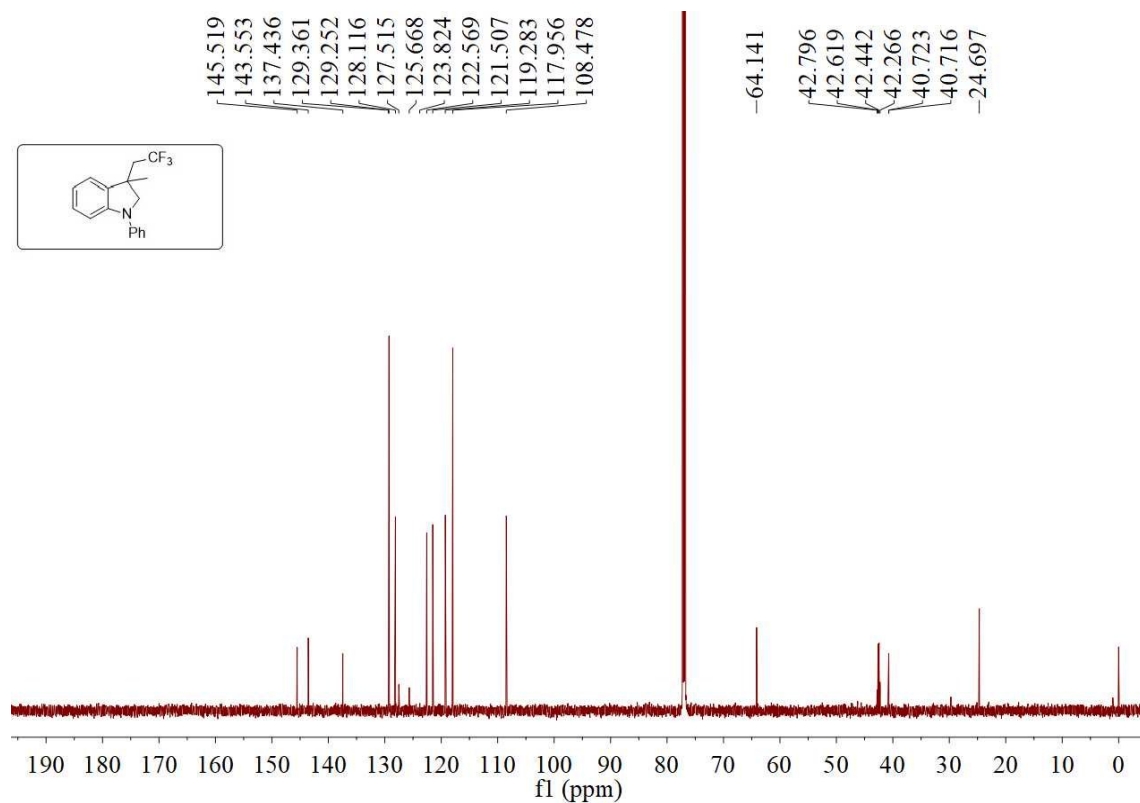

<sup>19</sup>F-NMR Spectra of 6h

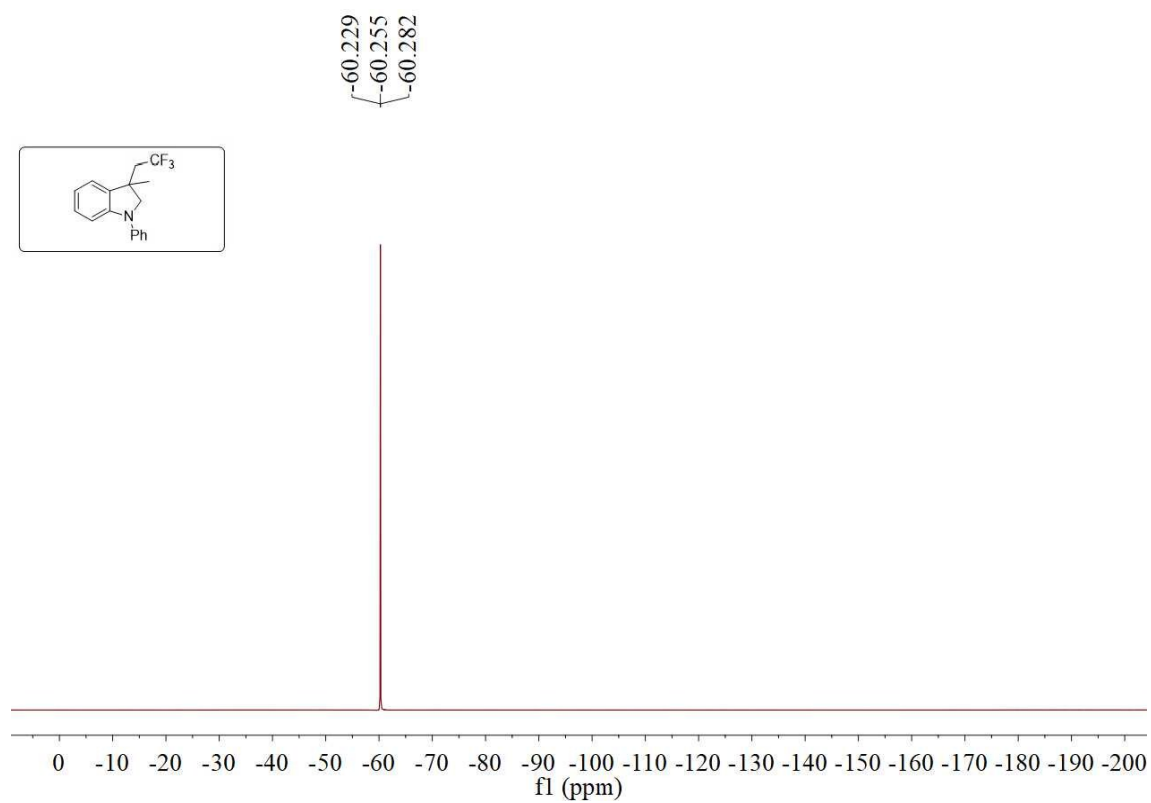

<sup>1</sup>H-NMR Spectra of 6i

# SUPPORTING INFORMATION

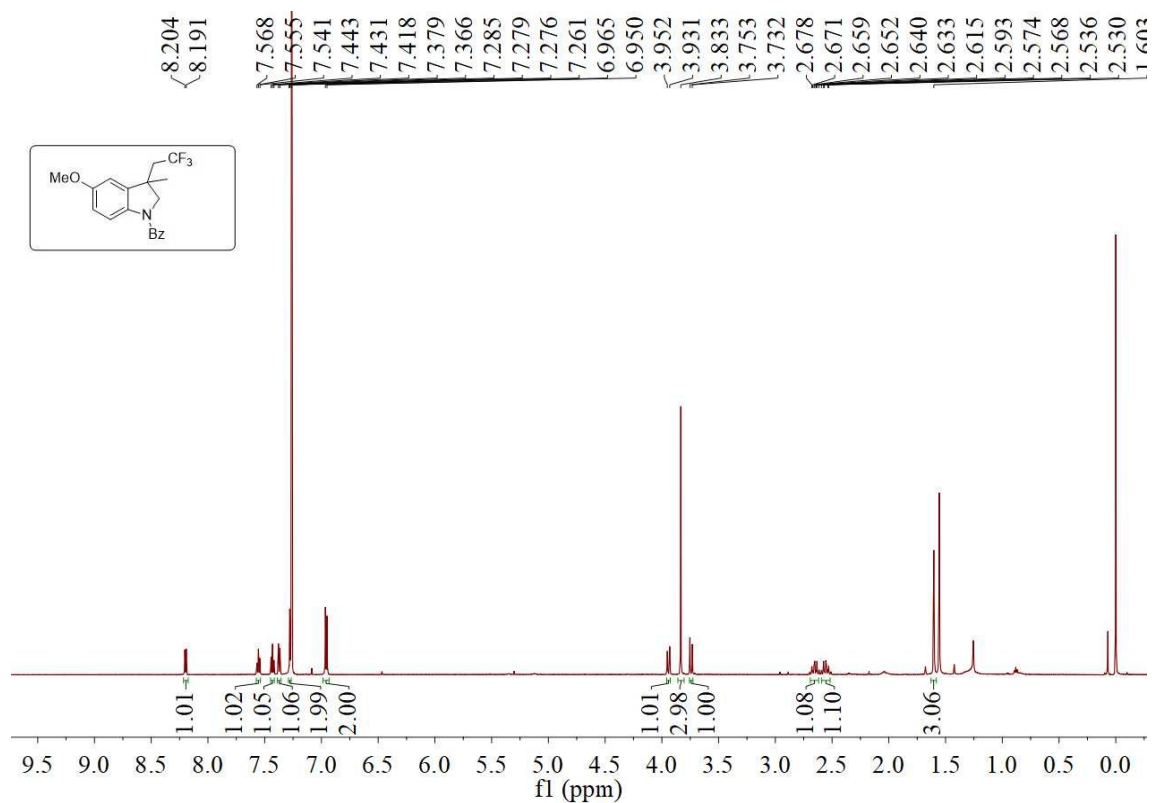

**<sup>13</sup>C-NMR Spectra of 6i**

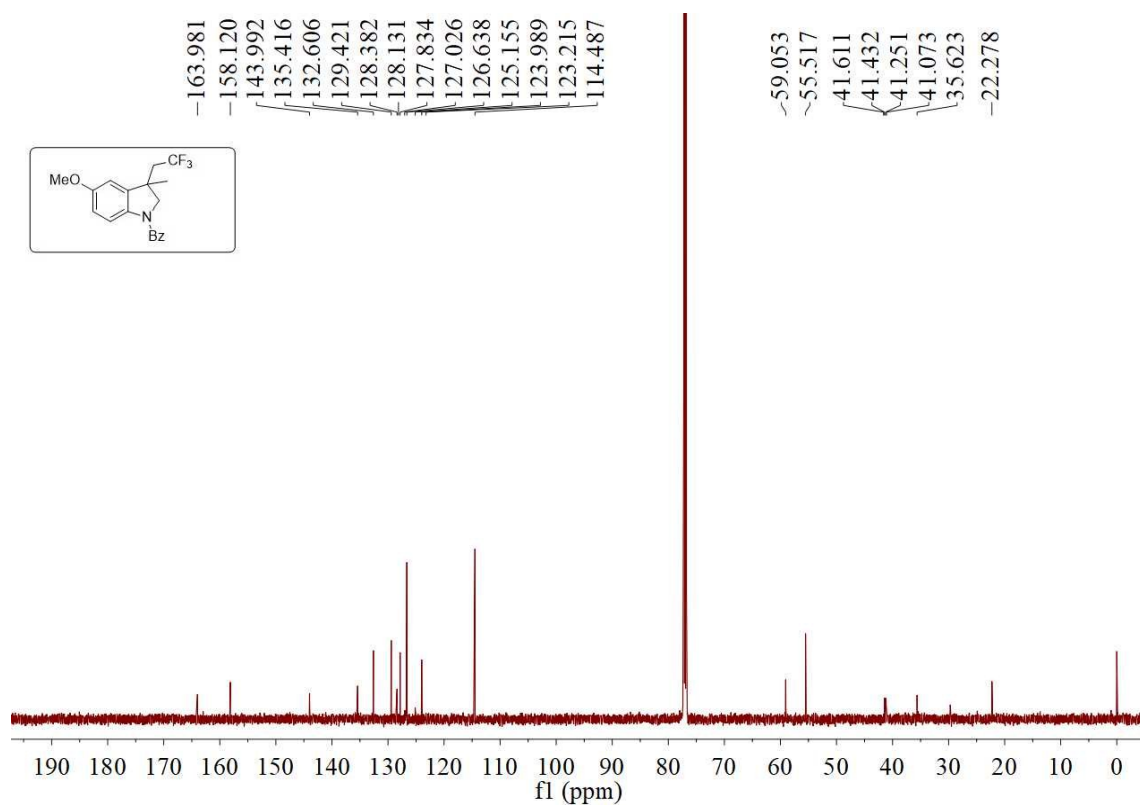

**<sup>19</sup>F-NMR Spectra of 6i**

# SUPPORTING INFORMATION

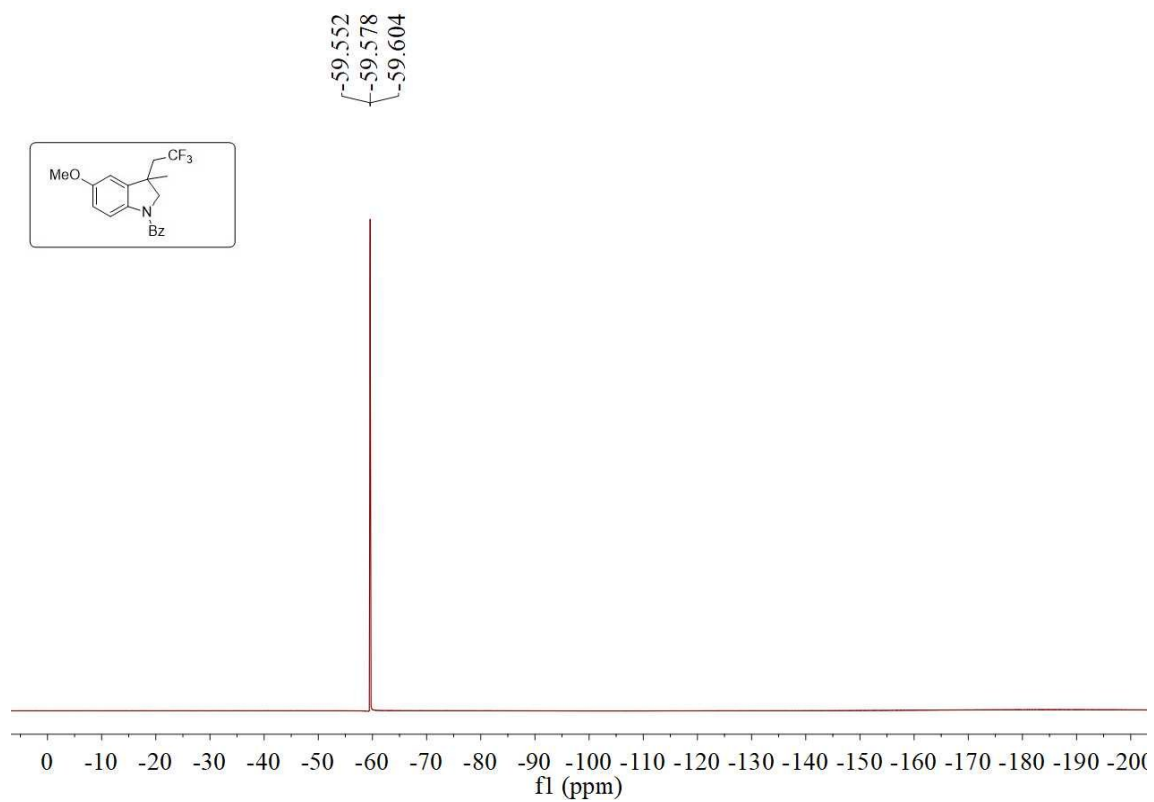

Supplement: c8ob03189d1.pdf [file c8ob03189d1.pdf]
